# Supplementary material
Source: PubMed Central journal article supplement (PMC9903687)
Supplement: mmc1.pdf [file mmc1.pdf]

# Supplementary Material

---

---

| <b>Dataset</b>                  | <b>Link</b>                                                                                                                                                                                             | <b>Download date</b> | <b>Version date</b> |
|---------------------------------|---------------------------------------------------------------------------------------------------------------------------------------------------------------------------------------------------------|----------------------|---------------------|
| SIVEP-Gripe 2020                | <a href="https://opendatasus.saude.gov.br/dataset/bd-srag-2020">https://opendatasus.saude.gov.br/dataset/bd-srag-2020</a>                                                                               | 17/05/2021           | 17/05/2021          |
| SIVEP-Gripe 2021                | <a href="https://opendatasus.saude.gov.br/dataset/bd-srag-2021">https://opendatasus.saude.gov.br/dataset/bd-srag-2021</a>                                                                               | 17/05/2021           | 17/05/2021          |
| GISAID                          | <a href="https://www.gisaid.org/">https://www.gisaid.org/</a>                                                                                                                                           | 01/06/2021           | 01/06/2021          |
| IBGE population estimates       | <a href="https://ftp.ibge.gov.br/Estimativas_de_Populacao/Estimativas_2020/POP2020_20210331.xls">https://ftp.ibge.gov.br/Estimativas_de_Populacao/Estimativas_2020/POP2020_20210331.xls</a>             | 17/05/2021           | 17/05/2021          |
| 2010 Census - IBGE              | <a href="https://biblioteca.ibge.gov.br/visualizacao/periodicos/92/cd.2010_aglomerados_subnormais.pdf">https://biblioteca.ibge.gov.br/visualizacao/periodicos/92/cd.2010_aglomerados_subnormais.pdf</a> | 09/09/2021           | 09/09/2021          |
| Hospital and ICU beds - DATASUS | <a href="http://tabnet.datasus.gov.br/cgi/deftohtm.exe?cnes/cnv/leintbr.def">http://tabnet.datasus.gov.br/cgi/deftohtm.exe?cnes/cnv/leintbr.def</a>                                                     | 17/05/2021           | 17/05/2021          |

Table 1: Links and versions of datasets used in the study.

| Variable name in the dataset                                                                                                                        | Variable description                             | Collected as                                                                                                 | Considered as                                                                                                           |
|-----------------------------------------------------------------------------------------------------------------------------------------------------|--------------------------------------------------|--------------------------------------------------------------------------------------------------------------|-------------------------------------------------------------------------------------------------------------------------|
| dt_notific, dt_interna, dt_evolucao, dt_entuti, dt_saiduti                                                                                          | Dates                                            | Date DD/MM/YYYY                                                                                              | We standardized the dates as there were several patterns in the dataset.                                                |
| hospital                                                                                                                                            | Was the patient admitted to the hospital?        | 'Yes', 'No', 'Ignored'                                                                                       | The Ignored level was disregarded.                                                                                      |
| pcr_sars2                                                                                                                                           | RT-PCR diagnostic result for SARS-CoV-2.         | Filled is considered as positive.                                                                            | For this study, only positive RT-PCR tests were considered.                                                             |
| evolucao                                                                                                                                            | Case evolution                                   | 'Discharge', 'Death', 'Death from another complication', 'Ignored'                                           | Only patients with discharge or death related to COVID-19 were considered.                                              |
| 'puerpera', 'cardiopati', 'hematologi', 'sind_down', 'hepatica', 'asma', 'diabetes', 'neurologic', 'pneumopati', 'imunodepre', 'renal', 'obesidade' | Comorbidities or risk factors collected          | For each comorbidities or risk factors, three levels were collected: Yes, No, and Ignored.                   | Considered at 2 levels: Yes and No. Missing and ignored entries were considered as without comorbidity or risk factors. |
| 'diarreaia', 'vomito', 'dor_abd', 'perd_olft', 'perd_pala', 'dispneia', 'tosse', 'desc_resp', 'garganta', 'febre', 'fadiga', 'saturacao'            | Collected symptoms                               | For each symptom, three levels were collected: Yes, No, and Ignored.                                         | Considered at 2 levels: Yes and No. Missing and ignored entries were considered to be symptom free.                     |
| sem_pri                                                                                                                                             | Epidemiological week of first symptoms.          | Calculated from the date of first symptoms.                                                                  |                                                                                                                         |
| uti                                                                                                                                                 | Was the patient admitted to the ICU?             | 'Yes', 'No', 'Ignored'                                                                                       | The Ignored level was considered as missing.                                                                            |
| suport_ven,                                                                                                                                         | Did the patient use ventilatory support?         | 'Yes, invasive', 'Yes, non-invasive', 'No', and 'Ignored'                                                    | The Ignored level was considered as missing.                                                                            |
| cs_sexo                                                                                                                                             | Sex of the patient.                              | 'Male', 'Female', and 'Ignored'                                                                              | The Ignored level was considered as missing.                                                                            |
| cs_raca                                                                                                                                             | Race/ethnicity declared by the patient           | White (Branca), Black (Preta), Asian (Amarelo), Brown (Parda), Indigenous (Indigena), and Ignored (Ignorado) | We consider the White, Asian, Indigenous, and group the Black and Brown races.                                          |
| cs_escol_n                                                                                                                                          | Patient's educational level.                     | Illiterate, Elementary School, Middle School, High School, College / University, Not applicable, and Ignored | The Ignored level was considered as missing.                                                                            |
| cs_zona                                                                                                                                             | Geographical area of the patient's home address. | Urban, Rural, Periphery, and Ignored                                                                         | The Ignored level was considered as missing.                                                                            |
| calc_idade                                                                                                                                          | synthetic                                        | Not applicable                                                                                               | Subtracting the date of hospitalization from the date of admission to the hospital                                      |
| faixa_etaria                                                                                                                                        | synthetic                                        | Not applicable                                                                                               | Patients grouped by age                                                                                                 |
| dias_internado, dias_uti, dias_atehosp, dias_ateuti                                                                                                 | synthetic                                        | Not applicable                                                                                               | Date DD/MM/YYYY - Dates derived from date of first symptom, hospitalization, and ICU                                    |
| qnt_comorbidades, qnt_sintomas                                                                                                                      | synthetic                                        | Not applicable                                                                                               | Number of comorbidities and symptoms that each patient presented.                                                       |

Table 2: Detailed description of the SIVEP-Gripe variables used in the study.

|                              | Whole pandemic   |                  | First Wave       |                 | Second Wave      |                 |
|------------------------------|------------------|------------------|------------------|-----------------|------------------|-----------------|
|                              | Cases            | Deaths           | Cases            | Deaths          | Cases            | Deaths          |
| Sex                          |                  |                  |                  |                 |                  |                 |
| Female                       | 104 193 (42.48%) | 63 228 (60.68%)  | 47 838 (41.60%)  | 26 718 (55.85%) | 56 355 (43.26%)  | 36 510 (64.79%) |
| Male                         | 141 092 (57.52%) | 85 131 (60.34%)  | 67 171 (58.40%)  | 37 867 (56.37%) | 73 921 (56.74%)  | 47 264 (63.94%) |
| General                      | 245 285          | 148 359 (60.48%) | 115 009 (46.89%) | 64 585 (56.16%) | 130 276 (53.11%) | 83 774 (64.31%) |
| Self-reported race/ethnicity |                  |                  |                  |                 |                  |                 |
| White                        | 109 465 (56.43%) | 66 334 (60.60%)  | 47 139 (54.27%)  | 26 120 (55.41%) | 62 326 (58.18%)  | 40 214 (64.52%) |
| Black/Brown                  | 81 687 (42.11%)  | 52 875 (64.73%)  | 38 274 (44.07%)  | 23 600 (61.66%) | 43 413 (40.53%)  | 29 275 (67.43%) |
| Asian                        | 2 493 (1.29%)    | 1 524 (61.13%)   | 1 231 (1.42%)    | 733 (59.55%)    | 1 262 (1.18%)    | 791 (62.68%)    |
| Indigenous                   | 330 (0.17%)      | 213 (64.55%)     | 214 (0.25%)      | 143 (66.82%)    | 116 (0.11%)      | 70 (60.34%)     |
| General                      | 193 975          | 120 946 (62.35%) | 86 858 (44.78%)  | 50 596 (58.25%) | 107 117 (55.22%) | 70 350 (65.68%) |
| Scholarity                   |                  |                  |                  |                 |                  |                 |
| Illiterate                   | 5 086 (5.87%)    | 3 850 (75.70%)   | 2 542 (6.35%)    | 1 887 (74.23%)  | 2 544 (5.46%)    | 1 963 (77.16%)  |
| Elementary School            | 23 480 (27.12%)  | 17 035 (72.55%)  | 10 869 (27.15%)  | 7 607 (69.99%)  | 12 611 (27.09%)  | 9 428 (74.76%)  |
| Middle School                | 16 988 (19.62%)  | 11 533 (67.89%)  | 7 817 (19.53%)   | 4 947 (63.29%)  | 9 171 (19.70%)   | 6 586 (71.81%)  |
| High School                  | 26 427 (30.52%)  | 15 146 (57.31%)  | 11 968 (29.90%)  | 6 241 (52.15%)  | 14 459 (31.06%)  | 8 905 (61.59%)  |
| College / University         | 14 600 (16.86%)  | 7 160 (49.04%)   | 6 833 (17.07%)   | 2 864 (41.91%)  | 7 767 (16.68%)   | 4 296 (55.31%)  |
| General                      | 86 581           | 54 724 (63.21%)  | 40 029 (46.23%)  | 23 546 (58.82%) | 46 552 (53.77%)  | 31 178 (66.97%) |
| Geographic zone              |                  |                  |                  |                 |                  |                 |
| Urban                        | 210 645 (96.76%) | 126 732 (60.16%) | 99 448 (96.92%)  | 55 544 (55.85%) | 111 197 (96.61%) | 71 188 (64.02%) |
| Rural                        | 6 390 (2.94%)    | 4 304 (67.36%)   | 2 832 (2.76%)    | 1 828 (64.55%)  | 3 558 (3.09%)    | 2 476 (69.59%)  |
| Periphery                    | 669 (0.31%)      | 426 (63.68%)     | 329 (0.32%)      | 205 (62.31%)    | 340 (0.30%)      | 221 (65.00%)    |
| General                      | 217 704          | 131 462 (60.39%) | 102 609 (47.13%) | 57 577 (56.11%) | 115 095 (52.87%) | 73 885 (64.19%) |

Table 3: Mortality in ICU stratified by sociodemographic characteristics and waves.

|                              | Whole pandemic   |                  | First Wave      |                 | Second Wave     |                 |
|------------------------------|------------------|------------------|-----------------|-----------------|-----------------|-----------------|
|                              | Cases            | Deaths           | Cases           | Deaths          | Cases           | Deaths          |
| Sex                          |                  |                  |                 |                 |                 |                 |
| Female                       | 59 240 (43.04%)  | 47 791 (80.67%)  | 25 292 (41.27%) | 19 663 (77.74%) | 33 948 (44.47%) | 28 128 (82.86%) |
| Male                         | 78 387 (56.96%)  | 63 480 (80.98%)  | 35 999 (58.73%) | 28 116 (78.10%) | 42 388 (55.53%) | 35 364 (83.43%) |
| General                      | 137 627          | 111 271 (80.85%) | 61 291 (44.53%) | 47 779 (77.95%) | 76 336 (55.47%) | 63 492 (83.17%) |
| Self-reported race/ethnicity |                  |                  |                 |                 |                 |                 |
| White                        | 61 552 (54.86%)  | 48 937 (79.51%)  | 24 242 (50.79%) | 18 358 (75.73%) | 37 310 (57.88%) | 30 579 (81.96%) |
| Black/Brown                  | 49 095 (43.76%)  | 41 023 (83.56%)  | 22 707 (47.58%) | 18 445 (81.23%) | 26 388 (40.93%) | 22 578 (85.56%) |
| Asian                        | 1 324 (1.18%)    | 1 061 (80.14%)   | 628 (1.32%)     | 491 (78.18%)    | 696 (1.08%)     | 570 (81.90%)    |
| Indigenous                   | 223 (0.20%)      | 180 (80.72%)     | 151 (0.32%)     | 119 (78.81%)    | 72 (0.11%)      | 61 (84.72%)     |
| General                      | 112 194          | 91 201 (81.29%)  | 47 728 (42.54%) | 37 413 (78.39%) | 64 466 (57.46%) | 53 788 (83.44%) |
| Scholarity                   |                  |                  |                 |                 |                 |                 |
| Illiterate                   | 3 444 (6.90%)    | 3 078 (89.37%)   | 1 723 (7.85%)   | 1 518 (88.10%)  | 1 721 (6.15%)   | 1 560 (90.64%)  |
| Elementary School            | 14 989 (30.03%)  | 12 924 (86.22%)  | 6 786 (30.93%)  | 5 741 (84.60%)  | 8 203 (29.33%)  | 7 183 (87.57%)  |
| Middle School                | 10 644 (21.33%)  | 8 842 (83.07%)   | 4 715 (21.49%)  | 3 760 (79.75%)  | 5 929 (21.20%)  | 5 082 (85.71%)  |
| High School                  | 14 139 (28.33%)  | 10 963 (77.54%)  | 5 943 (27.09%)  | 4 426 (74.47%)  | 8 196 (29.30%)  | 6 537 (79.76%)  |
| College / University         | 6 697 (13.42%)   | 4 980 (74.36%)   | 2 774 (12.64%)  | 1 932 (69.65%)  | 3 923 (14.02%)  | 3 048 (77.70%)  |
| General                      | 49 913           | 40 787 (81.72%)  | 21 941 (43.96%) | 17 377 (79.20%) | 27 972 (56.04%) | 23 410 (83.69%) |
| Geographic zone              |                  |                  |                 |                 |                 |                 |
| Urban                        | 117 070 (96.18%) | 94 403 (80.64%)  | 52 595 (96.23%) | 40 952 (77.86%) | 64 475 (96.15%) | 53 451 (82.90%) |
| Rural                        | 4 201 (3.45%)    | 3 528 (83.98%)   | 1 849 (3.38%)   | 1 520 (82.21%)  | 2 352 (3.51%)   | 2 008 (85.37%)  |
| Periphery                    | 444 (0.36%)      | 372 (83.78%)     | 212 (0.39%)     | 184 (86.79%)    | 232 (0.35%)     | 188 (81.03%)    |
| General                      | 121 715          | 98 303 (80.76%)  | 54 656 (44.90%) | 42 656 (78.04%) | 67 059 (55.10%) | 55 647 (82.98%) |

Table 4: Mortality of patients with the use of invasive mechanical ventilation stratified by sociodemographic characteristics and waves.

|                              | Whole pandemic   |                 | First Wave       |                 | Second Wave      |                 |
|------------------------------|------------------|-----------------|------------------|-----------------|------------------|-----------------|
|                              | Cases            | Deaths          | Cases            | Deaths          | Cases            | Deaths          |
| Sex                          |                  |                 |                  |                 |                  |                 |
| Female                       | 147 961 (44.64%) | 41 116 (27.79%) | 63 485 (44.04%)  | 17 011 (26.80%) | 84 476 (45.09%)  | 24 105 (28.53%) |
| Male                         | 183 517 (55.36%) | 50 649 (27.60%) | 80 653 (55.96%)  | 21 618 (26.80%) | 102 864 (54.91%) | 29 031 (28.22%) |
| General                      | 331 478          | 91 765 (27.68%) | 144 138 (43.48%) | 38 629 (26.80%) | 187 340 (56.52%) | 53 136 (28.36%) |
| Self-reported race/ethnicity |                  |                 |                  |                 |                  |                 |
| White                        | 155 819 (58.13%) | 43 882 (28.16%) | 61 606 (54.72%)  | 16 851 (27.35%) | 94 213 (60.60%)  | 27 031 (28.69%) |
| Black/Brown                  | 108 311 (40.41%) | 33 151 (30.61%) | 49 115 (43.62%)  | 14 630 (29.79%) | 59 196 (38.08%)  | 18 521 (31.29%) |
| Asian                        | 3 487 (1.30%)    | 1 013 (29.05%)  | 1 593 (1.41%)    | 455 (28.56%)    | 1 894 (1.22%)    | 558 (29.46%)    |
| Indigenous                   | 436 (0.16%)      | 120 (27.52%)    | 271 (0.24%)      | 77 (28.41%)     | 165 (0.11%)      | 43 (26.06%)     |
| General                      | 268 053          | 78 166 (29.16%) | 112 585 (42.00%) | 32 013 (28.43%) | 155 468 (58.00%) | 46 153 (29.69%) |
| Scholarity                   |                  |                 |                  |                 |                  |                 |
| Illiterate                   | 7 032 (5.73%)    | 3 395 (48.28%)  | 3 565 (6.62%)    | 1 730 (48.53%)  | 3 467 (5.03%)    | 1 665 (48.02%)  |
| Elementary School            | 33 197 (27.04%)  | 13 324 (40.14%) | 15 039 (27.95%)  | 5 707 (37.95%)  | 18 158 (26.34%)  | 7 617 (41.95%)  |
| Middle School                | 24 122 (19.65%)  | 7 340 (30.43%)  | 10 560 (19.62%)  | 3 065 (29.02%)  | 13 562 (19.67%)  | 4 275 (31.52%)  |
| High School                  | 39 731 (32.37%)  | 9 250 (23.28%)  | 16 935 (31.47%)  | 3 697 (21.83%)  | 22 796 (33.07%)  | 5 553 (24.36%)  |
| College / University         | 18 672 (15.21%)  | 3 642 (19.51%)  | 7 716 (14.34%)   | 1 326 (17.19%)  | 10 956 (15.89%)  | 2 316 (21.14%)  |
| General                      | 122 754          | 36 951 (30.10%) | 53 815 (43.84%)  | 15 525 (28.85%) | 68 939 (56.16%)  | 21 426 (31.08%) |
| Geographic zone              |                  |                 |                  |                 |                  |                 |
| Urban                        | 289 372 (96.69%) | 79 963 (27.63%) | 126 472 (96.91%) | 33 755 (26.69%) | 162 900 (96.52%) | 46 208 (28.37%) |
| Rural                        | 9 030 (3.02%)    | 3 118 (34.53%)  | 3 658 (2.80%)    | 1 245 (34.03%)  | 5 372 (3.18%)    | 1 873 (34.87%)  |
| Periphery                    | 882 (0.29%)      | 276 (31.29%)    | 378 (0.29%)      | 113 (29.89%)    | 504 (0.30%)      | 163 (32.34%)    |
| General                      | 299 284          | 83 357 (27.85%) | 130 508 (43.61%) | 35 113 (26.90%) | 168 776 (56.39%) | 48 244 (28.58%) |

Table 5: Mortality of patients with the use of non-invasive ventilation stratified by sociodemographic characteristics and waves.

| Variables            | Total             |                  | White            |                  | Black/Brown      |                 | Asian          |                | Indigenous    |              |
|----------------------|-------------------|------------------|------------------|------------------|------------------|-----------------|----------------|----------------|---------------|--------------|
|                      | Cases             | Deaths           | Cases            | Deaths           | Cases            | Deaths          | Cases          | Deaths         | Cases         | Deaths       |
| Age groups           |                   |                  |                  |                  |                  |                 |                |                |               |              |
| 0 to 19              | 10 152 (1.50%)    | 969 (9.54%)      | 3 393 (1.14%)    | 274 (8.08%)      | 4 421 (1.94%)    | 522 (11.81%)    | 61 (0.88%)     | 9 (14.75%)     | 55 (5.49%)    | 13 (23.64%)  |
| 20 to 39             | 82 214 (12.12%)   | 11 666 (14.19%)  | 34 450 (11.53%)  | 4 414 (12.81%)   | 28 509 (12.50%)  | 5 122 (17.97%)  | 755 (10.89%)   | 89 (11.79%)    | 142 (14.19%)  | 22 (15.49%)  |
| 40 to 49             | 96 950 (14.29%)   | 19 375 (19.98%)  | 40 505 (13.55%)  | 7 438 (18.36%)   | 33 487 (14.68%)  | 8 280 (24.75%)  | 837 (12.07%)   | 172 (20.55%)   | 147 (14.69%)  | 29 (19.73%)  |
| 50 to 59             | 128 931 (19.01%)  | 36 310 (28.16%)  | 55 359 (18.52%)  | 14 736 (26.62%)  | 44 121 (19.34%)  | 14 792 (33.53%) | 1 220 (17.59%) | 325 (26.45%)   | 191 (19.08%)  | 66 (34.55%)  |
| 60 to 69             | 148 303 (21.87%)  | 61 602 (41.54%)  | 65 968 (22.07%)  | 26 691 (40.46%)  | 50 253 (22.03%)  | 23 616 (46.90%) | 1 546 (22.30%) | 578 (37.39%)   | 185 (18.48%)  | 75 (40.54%)  |
| 70 to 79             | 121 879 (17.97%)  | 64 746 (53.12%)  | 56 140 (18.78%)  | 29 295 (52.18%)  | 40 023 (17.54%)  | 23 211 (57.99%) | 1 435 (20.70%) | 714 (49.76%)   | 161 (16.08%)  | 98 (60.87%)  |
| 80+                  | 89 806 (13.24%)   | 57 242 (63.74%)  | 43 072 (14.41%)  | 27 382 (63.57%)  | 27 320 (11.98%)  | 18 324 (67.07%) | 1 080 (15.58%) | 698 (64.63%)   | 120 (11.99%)  | 71 (59.17%)  |
| General              | 678 235 (100.00%) | 251 910 (37.14%) | 298 887 (44.07%) | 110 230 (36.88%) | 228 134 (33.64%) | 93 867 (41.15%) | 6 934 (1.02%)  | 2 585 (37.28%) | 1 001 (0.15%) | 374 (37.36%) |
| Sex                  |                   |                  |                  |                  |                  |                 |                |                |               |              |
| Female               | 301 521 (44.46%)  | 110 256 (36.57%) | 135 299 (45.27%) | 48 795 (36.06%)  | 100 588 (44.10%) | 40 813 (40.57%) | 2 905 (41.90%) | 1 052 (36.21%) | 433 (43.26%)  | 158 (36.49%) |
| Male                 | 376 638 (55.54%)  | 141 627 (37.60%) | 163 571 (54.73%) | 61 429 (37.55%)  | 127 518 (55.90%) | 53 040 (41.59%) | 4 028 (58.10%) | 1 533 (38.06%) | 568 (56.74%)  | 216 (38.03%) |
| General              | 678 159 (99.99%)  | 251 883 (37.14%) | 298 870 (44.07%) | 110 224 (36.88%) | 228 106 (33.63%) | 93 853 (41.14%) | 6 933 (1.02%)  | 2 585 (37.29%) | 1 001 (0.15%) | 374 (37.36%) |
| Scholarity           |                   |                  |                  |                  |                  |                 |                |                |               |              |
| Illiterate           | 13 744 (5.73%)    | 7 847 (57.09%)   | 5 817 (4.24%)    | 3 068 (52.74%)   | 7 225 (8.17%)    | 4 427 (61.27%)  | 123 (5.16%)    | 61 (49.59%)    | 79 (19.75%)   | 44 (55.70%)  |
| Elementary School    | 62 953 (26.26%)   | 31 171 (49.51%)  | 35 451 (25.86%)  | 17 100 (48.24%)  | 25 047 (28.32%)  | 12 982 (51.83%) | 542 (22.73%)   | 248 (45.76%)   | 151 (37.75%)  | 57 (37.75%)  |
| Middle School        | 45 712 (19.07%)   | 19 166 (41.93%)  | 25 491 (18.60%)  | 10 302 (40.41%)  | 18 436 (20.85%)  | 8 203 (44.49%)  | 353 (14.81%)   | 154 (43.63%)   | 67 (16.75%)   | 33 (49.25%)  |
| High School          | 77 903 (32.50%)   | 24 219 (31.09%)  | 44 038 (32.13%)  | 13 240 (30.06%)  | 28 204 (31.89%)  | 9 635 (34.16%)  | 853 (35.78%)   | 276 (32.36%)   | 76 (19.00%)   | 18 (23.68%)  |
| College / University | 39 397 (16.44%)   | 10 326 (26.21%)  | 26 265 (19.16%)  | 6 747 (25.69%)   | 9 528 (10.77%)   | 2 894 (30.37%)  | 513 (21.52%)   | 130 (25.34%)   | 27 (6.75%)    | 12 (44.44%)  |
| General              | 239 709 (53.34%)  | 92 729 (38.68%)  | 137 062 (20.21%) | 50 457 (36.81%)  | 88 440 (13.04%)  | 38 141 (43.13%) | 2 384 (0.35%)  | 869 (36.45%)   | 400 (0.06%)   | 164 (41.00%) |
| Geographic zone      |                   |                  |                  |                  |                  |                 |                |                |               |              |
| Urban                | 584 140 (96.66%)  | 215 310 (36.86%) | 262 192 (96.80%) | 95 628 (36.47%)  | 199 077 (95.74%) | 80 860 (40.62%) | 6 117 (97.03%) | 2 286 (37.37%) | 503 (57.09%)  | 179 (35.59%) |
| Rural                | 18 316 (3.03%)    | 8 024 (43.81%)   | 7 908 (2.92%)    | 3 041 (38.45%)   | 8 125 (3.91%)    | 4 033 (49.64%)  | 161 (2.55%)    | 70 (43.48%)    | 373 (42.34%)  | 151 (40.48%) |
| Periphery            | 1 842 (0.30%)     | 767 (41.64%)     | 757 (0.28%)      | 287 (37.91%)     | 740 (0.36%)      | 340 (45.95%)    | 26 (0.41%)     | 9 (34.62%)     | 5 (0.57%)     | 2 (40.00%)   |
| General              | 604 298 (89.10%)  | 224 101 (37.08%) | 270 857 (39.94%) | 98 956 (36.53%)  | 207 942 (30.66%) | 85 233 (40.99%) | 6 304 (0.93%)  | 2 365 (37.52%) | 881 (0.13%)   | 332 (37.68%) |
| ICU                  |                   |                  |                  |                  |                  |                 |                |                |               |              |
| Yes                  | 245 304 (39.66%)  | 148 870 (60.48%) | 109 465 (38.99%) | 66 334 (60.60%)  | 81 687 (39.74%)  | 52 875 (64.73%) | 2 493 (39.91%) | 1 524 (61.13%) | 330 (36.79%)  | 213 (64.55%) |
| No                   | 373 289 (60.34%)  | 80 365 (21.53%)  | 171 293 (61.01%) | 36 613 (21.37%)  | 123 887 (60.26%) | 31 429 (25.37%) | 3 754 (60.09%) | 811 (21.60%)   | 367 (63.21%)  | 127 (27.40%) |
| General              | 618 593 (91.21%)  | 228 735 (36.98%) | 280 758 (41.40%) | 102 947 (36.67%) | 205 574 (30.31%) | 84 304 (41.01%) | 6 247 (0.92%)  | 2 335 (37.38%) | 897 (0.13%)   | 340 (37.90%) |
| Respiratory support  |                   |                  |                  |                  |                  |                 |                |                |               |              |
| Invasive             | 137 638 (23.07%)  | 111 279 (80.85%) | 61 552 (22.49%)  | 48 937 (79.51%)  | 49 095 (24.66%)  | 41 023 (83.56%) | 1 324 (22.00%) | 1 061 (80.14%) | 223 (25.84%)  | 180 (80.72%) |
| Non-invasive         | 331 506 (55.56%)  | 91 772 (27.68%)  | 155 819 (56.93%) | 43 882 (28.16%)  | 108 311 (54.40%) | 33 151 (30.61%) | 3 487 (57.94%) | 1 013 (29.05%) | 436 (50.52%)  | 120 (27.52%) |
| No                   | 127 516 (21.37%)  | 18 046 (14.15%)  | 56 344 (20.58%)  | 7 555 (13.41%)   | 41 683 (20.94%)  | 7 313 (17.54%)  | 1 207 (20.06%) | 164 (13.59%)   | 204 (23.64%)  | 27 (13.24%)  |
| General              | 596 660 (87.97%)  | 221 097 (37.06%) | 273 715 (40.36%) | 100 374 (36.67%) | 199 089 (29.35%) | 81 487 (40.93%) | 6 018 (0.89%)  | 2 238 (37.19%) | 863 (0.13%)   | 327 (37.89%) |

Table 6: Mortality stratified by sociodemographic characteristics.

| Variables            | Total             |                  | White            |                 | Black/Brown      |                 | Asian          |                | Indigenous   |              |
|----------------------|-------------------|------------------|------------------|-----------------|------------------|-----------------|----------------|----------------|--------------|--------------|
|                      | Cases             | Deaths           | Cases            | Deaths          | Cases            | Deaths          | Cases          | Deaths         | Cases        | Deaths       |
| Age groups           |                   |                  |                  |                 |                  |                 |                |                |              |              |
| 0 to 19              | 5 983 (1.84%)     | 548 (9.16%)      | 1 852 (1.44%)    | 126 (6.80%)     | 2 658 (2.36%)    | 310 (11.66%)    | 36 (1.01%)     | 5 (13.89%)     | 41 (6.14%)   | 13 (31.71%)  |
| 20 to 39             | 40 842 (12.53%)   | 4 530 (11.09%)   | 15 316 (11.93%)  | 1 409 (9.20%)   | 14 330 (12.73%)  | 2 094 (14.61%)  | 421 (11.78%)   | 48 (11.40%)    | 91 (13.62%)  | 12 (13.19%)  |
| 40 to 49             | 45 996 (14.11%)   | 7 574 (16.47%)   | 17 041 (13.27%)  | 2 410 (14.14%)  | 16 122 (14.32%)  | 3 406 (21.13%)  | 430 (12.03%)   | 71 (16.51%)    | 101 (15.12%) | 20 (19.80%)  |
| 50 to 59             | 59 966 (18.40%)   | 14 759 (24.61%)  | 22 913 (17.85%)  | 4 972 (21.70%)  | 20 430 (18.60%)  | 3 360 (30.39%)  | 589 (16.48%)   | 141 (23.94%)   | 130 (19.46%) | 47 (36.15%)  |
| 60 to 69             | 67 562 (20.73%)   | 26 166 (38.73%)  | 26 718 (20.81%)  | 9 685 (36.25%)  | 23 644 (21.01%)  | 10 603 (44.84%) | 747 (20.90%)   | 257 (34.40%)   | 117 (17.51%) | 46 (39.32%)  |
| 70 to 79             | 58 145 (17.84%)   | 29 743 (51.15%)  | 23 864 (18.59%)  | 11 814 (49.51%) | 19 939 (17.72%)  | 11 247 (56.41%) | 743 (20.78%)   | 359 (48.32%)   | 100 (14.97%) | 61 (61.00%)  |
| 80+                  | 47 409 (14.55%)   | 30 124 (63.54%)  | 20 678 (16.11%)  | 13 124 (63.47%) | 14 922 (13.26%)  | 9 962 (66.76%)  | 609 (17.03%)   | 397 (65.19%)   | 88 (13.17%)  | 54 (61.36%)  |
| General              | 325 903 (100.00%) | 113 444 (34.81%) | 128 382 (39.39%) | 43 540 (33.91%) | 112 545 (34.53%) | 43 982 (39.08%) | 3 575 (1.10%)  | 1 278 (35.75%) | 668 (0.20%)  | 253 (37.87%) |
| Sex                  |                   |                  |                  |                 |                  |                 |                |                |              |              |
| Female               | 142 942 (43.87%)  | 48 205 (33.72%)  | 57 263 (44.61%)  | 18 778 (32.79%) | 48 621 (43.21%)  | 18 327 (37.69%) | 1 455 (40.70%) | 517 (35.53%)   | 279 (41.77%) | 95 (34.05%)  |
| Male                 | 182 915 (56.13%)  | 65 227 (35.66%)  | 71 110 (55.39%)  | 24 761 (34.82%) | 63 907 (56.79%)  | 25 648 (40.13%) | 2 120 (59.30%) | 761 (35.90%)   | 389 (58.23%) | 158 (40.62%) |
| General              | 325 857 (99.99%)  | 113 432 (34.81%) | 128 373 (39.39%) | 43 539 (33.92%) | 112 528 (34.53%) | 43 975 (39.08%) | 3 575 (1.10%)  | 1 278 (35.75%) | 668 (0.20%)  | 253 (37.87%) |
| Scholarity           |                   |                  |                  |                 |                  |                 |                |                |              |              |
| Illiterate           | 7 260 (6.30%)     | 4 118 (56.72%)   | 2 818 (4.58%)    | 1 470 (52.16%)  | 3 973 (8.75%)    | 2 408 (60.61%)  | 82 (6.28%)     | 38 (46.34%)    | 61 (22.51%)  | 33 (54.10%)  |
| Elementary School    | 30 355 (26.34%)   | 14 219 (46.84%)  | 15 811 (25.71%)  | 7 115 (45.00%)  | 13 074 (28.80%)  | 6 452 (49.35%)  | 299 (22.91%)   | 133 (44.48%)   | 102 (37.64%) | 34 (33.33%)  |
| Middle School        | 21 736 (18.86%)   | 8 482 (39.02%)   | 11 343 (18.44%)  | 4 201 (37.04%)  | 9 328 (20.55%)   | 3 897 (41.78%)  | 198 (15.17%)   | 83 (41.92%)    | 51 (18.82%)  | 24 (47.06%)  |
| High School          | 37 101 (32.19%)   | 10 201 (27.50%)  | 19 585 (31.85%)  | 5 194 (26.52%)  | 14 433 (31.79%)  | 4 347 (30.12%)  | 459 (35.17%)   | 130 (28.32%)   | 40 (14.76%)  | 11 (27.50%)  |
| College / University | 18 808 (16.32%)   | 4 127 (21.94%)   | 11 941 (19.42%)  | 2 580 (21.61%)  | 4 592 (10.11%)   | 1 187 (25.85%)  | 267 (20.46%)   | 70 (26.22%)    | 17 (6.27%)   | 7 (41.18%)   |
| General              | 115 260 (35.37%)  | 41 147 (35.70%)  | 61 498 (18.87%)  | 20 560 (33.43%) | 45 400 (13.93%)  | 18 291 (40.29%) | 1 305 (0.40%)  | 454 (34.79%)   | 271 (0.89%)  | 109 (40.22%) |
| Geographic zone      |                   |                  |                  |                 |                  |                 |                |                |              |              |
| Urban                | 281 272 (86.81%)  | 97 349 (34.61%)  | 114 178 (87.20%) | 38 521 (33.74%) | 98 307 (85.80%)  | 38 037 (38.66%) | 3 142 (96.50%) | 1 125 (35.81%) | 304 (52.14%) | 106 (34.87%) |
| Rural                | 8 367 (2.85%)     | 3 525 (42.13%)   | 2 980 (2.54%)    | 1 021 (34.26%)  | 3 972 (3.87%)    | 1 923 (48.41%)  | 97 (2.98%)     | 43 (44.33%)    | 276 (47.34%) | 115 (41.67%) |
| Periphery            | 888 (0.31%)       | 364 (40.99%)     | 907 (0.26%)      | 101 (32.90%)    | 345 (0.34%)      | 168 (48.70%)    | 14 (0.43%)     | 6 (42.86%)     | 3 (0.51%)    | 2 (66.67%)   |
| General              | 290 527 (89.15%)  | 101 238 (34.85%) | 117 465 (36.04%) | 39 643 (33.75%) | 102 714 (31.52%) | 40 128 (39.07%) | 3 253 (1.00%)  | 1 174 (36.09%) | 583 (0.18%)  | 223 (38.25%) |
| ICU                  |                   |                  |                  |                 |                  |                 |                |                |              |              |
| Yes                  | 115 018 (39.08%)  | 64 589 (56.16%)  | 47 139 (39.18%)  | 26 120 (55.41%) | 38 274 (37.80%)  | 23 600 (61.66%) | 1 231 (38.60%) | 733 (59.55%)   | 214 (35.73%) | 143 (66.82%) |
| No                   | 179 264 (60.92%)  | 36 689 (20.47%)  | 73 189 (60.82%)  | 14 292 (19.53%) | 62 983 (62.20%)  | 15 556 (24.70%) | 1 958 (61.40%) | 404 (20.63%)   | 385 (64.27%) | 86 (22.34%)  |
| General              | 294 282 (90.30%)  | 101 278 (34.42%) | 120 328 (36.92%) | 40 412 (33.58%) | 101 257 (31.07%) | 39 156 (38.67%) | 3 189 (0.98%)  | 1 137 (35.65%) | 599 (0.18%)  | 229 (38.23%) |
| Respiratory support  |                   |                  |                  |                 |                  |                 |                |                |              |              |
| Invasive             | 61 297 (21.76%)   | 47 782 (77.95%)  | 24 242 (20.78%)  | 18 358 (75.73%) | 22 707 (23.37%)  | 18 445 (81.23%) | 628 (20.94%)   | 491 (78.18%)   | 151 (26.49%) | 119 (78.81%) |
| Non-invasive         | 174 245 (51.17%)  | 38 633 (26.80%)  | 61 606 (52.80%)  | 16 851 (27.35%) | 49 115 (50.55%)  | 14 630 (29.79%) | 1 593 (53.12%) | 455 (28.56%)   | 271 (47.54%) | 77 (28.41%)  |
| No                   | 24 129 (7.07%)    | 10 710 (14.05%)  | 30 837 (26.43%)  | 4 049 (13.13%)  | 25 347 (26.09%)  | 4 425 (17.46%)  | 778 (25.94%)   | 109 (10.41%)   | 148 (25.96%) | 20 (13.51%)  |
| General              | 281 699 (86.44%)  | 97 125 (34.48%)  | 116 685 (35.80%) | 39 258 (33.64%) | 97 169 (29.82%)  | 37 500 (38.59%) | 2 999 (0.92%)  | 1 055 (35.18%) | 570 (0.17%)  | 216 (37.89%) |

Table 7: Mortality stratified by sociodemographic characteristics and first wave.

| Variables            | Total             |                  | White            |                 | Black/Brown      |                 | Asian          |                | Indigenous   |              |
|----------------------|-------------------|------------------|------------------|-----------------|------------------|-----------------|----------------|----------------|--------------|--------------|
|                      | Cases             | Deaths           | Cases            | Deaths          | Cases            | Deaths          | Cases          | Deaths         | Cases        | Deaths       |
| Age groups           |                   |                  |                  |                 |                  |                 |                |                |              |              |
| 0 to 19              | 4 169 (1.18%)     | 421 (10.10%)     | 1 541 (0.90%)    | 148 (9.60%)     | 1 763 (1.53%)    | 212 (12.02%)    | 25 (0.74%)     | 4 (16.00%)     | 14 (4.20%)   | 0 (0.00%)    |
| 20 to 39             | 41 372 (11.74%)   | 7 136 (17.25%)   | 19 134 (11.22%)  | 3 005 (15.71%)  | 14 179 (12.27%)  | 3 028 (21.36%)  | 334 (9.94%)    | 41 (12.28%)    | 51 (15.32%)  | 10 (19.61%)  |
| 40 to 49             | 50 954 (14.46%)   | 11 801 (23.16%)  | 23 464 (13.76%)  | 5 028 (21.43%)  | 17 365 (15.02%)  | 4 874 (28.07%)  | 407 (12.12%)   | 101 (24.82%)   | 46 (13.81%)  | 9 (19.57%)   |
| 50 to 59             | 68 965 (19.57%)   | 21 551 (31.25%)  | 32 446 (19.03%)  | 9 764 (30.09%)  | 23 191 (20.06%)  | 8 432 (36.36%)  | 631 (18.79%)   | 184 (29.16%)   | 61 (18.32%)  | 19 (31.15%)  |
| 60 to 69             | 80 741 (22.92%)   | 35 436 (43.89%)  | 39 250 (23.02%)  | 17 006 (43.33%) | 26 609 (23.02%)  | 13 013 (48.90%) | 799 (23.79%)   | 321 (40.18%)   | 68 (20.42%)  | 29 (42.65%)  |
| 70 to 79             | 63 734 (18.09%)   | 35 003 (54.92%)  | 32 276 (18.93%)  | 17 481 (54.16%) | 20 084 (17.38%)  | 11 964 (59.57%) | 692 (20.60%)   | 355 (51.30%)   | 61 (18.32%)  | 37 (60.66%)  |
| 80+                  | 42 397 (12.03%)   | 27 118 (63.96%)  | 22 304 (13.13%)  | 14 258 (63.67%) | 12 398 (10.73%)  | 8 362 (67.45%)  | 471 (14.02%)   | 301 (63.91%)   | 32 (6.61%)   | 17 (33.12%)  |
| General              | 352 332 (100.00%) | 138 466 (39.30%) | 170 505 (48.39%) | 66 690 (39.11%) | 115 589 (32.81%) | 49 885 (43.16%) | 3 359 (0.95%)  | 1 307 (38.91%) | 333 (0.90%)  | 121 (36.34%) |
| Sex                  |                   |                  |                  |                 |                  |                 |                |                |              |              |
| Female               | 158 579 (45.01%)  | 62 051 (39.13%)  | 78 036 (45.77%)  | 30 017 (38.47%) | 51 967 (44.96%)  | 22 486 (43.27%) | 1 450 (43.18%) | 535 (36.90%)   | 154 (46.25%) | 63 (40.91%)  |
| Male                 | 193 723 (54.99%)  | 76 400 (39.44%)  | 92 461 (54.23%)  | 36 668 (39.66%) | 63 611 (55.04%)  | 27 392 (43.06%) | 1 908 (56.82%) | 772 (40.46%)   | 179 (53.75%) | 58 (32.40%)  |
| General              | 352 302 (99.99%)  | 138 451 (39.30%) | 170 497 (48.39%) | 66 685 (39.11%) | 115 578 (32.80%) | 49 878 (43.16%) | 3 358 (0.95%)  | 1 307 (38.92%) | 333 (0.90%)  | 121 (36.34%) |
| Scholarity           |                   |                  |                  |                 |                  |                 |                |                |              |              |
| Illiterate           | 6 484 (5.21%)     | 3 729 (57.51%)   | 2 999 (3.97%)    | 1 598 (53.28%)  | 3 252 (7.56%)    | 2 019 (62.08%)  | 41 (3.80%)     | 23 (56.10%)    | 18 (13.95%)  | 11 (61.11%)  |
| Elementary School    | 32 598 (26.19%)   | 16 952 (52.00%)  | 19 640 (25.99%)  | 9 985 (50.84%)  | 11 973 (27.82%)  | 6 530 (54.54%)  | 243 (22.52%)   | 115 (47.33%)   | 49 (37.98%)  | 23 (46.94%)  |
| Middle School        | 23 976 (19.27%)   | 10 684 (44.56%)  | 14 148 (18.72%)  | 6 101 (43.12%)  | 9 108 (21.16%)   | 4 306 (47.28%)  | 155 (14.37%)   | 71 (45.81%)    | 16 (12.40%)  | 9 (56.25%)   |
| High School          | 40 802 (32.70%)   | 14 018 (34.36%)  | 24 453 (32.36%)  | 8 046 (32.90%)  | 13 771 (32.00%)  | 5 288 (38.40%)  | 394 (36.52%)   | 146 (37.06%)   | 36 (27.91%)  | 7 (19.44%)   |
| College / University | 20 589 (16.54%)   | 6 199 (30.11%)   | 14 324 (18.96%)  | 4 167 (29.09%)  | 4 936 (11.47%)   | 1 707 (34.58%)  | 246 (22.80%)   | 60 (24.30%)    | 10 (7.75%)   | 5 (50.00%)   |
| General              | 124 449 (35.32%)  | 51 582 (41.45%)  | 75 564 (21.45%)  | 29 897 (39.57%) | 43 040 (12.22%)  | 19 850 (46.12%) | 1 079 (0.31%)  | 415 (38.46%)   | 129 (0.04%)  | 55 (42.64%)  |
| Geographic zone      |                   |                  |                  |                 |                  |                 |                |                |              |              |
| Urban                | 302 868 (96.53%)  | 117 961 (38.95%) | 148 014 (96.49%) | 57 107 (38.58%) | 100 680 (95.68%) | 42 823 (42.53%) | 2 975 (97.51%) | 1 161 (39.03%) | 199 (66.78%) | 73 (36.68%)  |
| Rural                | 9 949 (3.17%)     | 4 499 (45.22%)   | 4 928 (3.21%)    | 2 020 (40.99%)  | 4 153 (3.95%)    | 2 110 (50.81%)  | 64 (2.10%)     | 27 (42.19%)    | 97 (32.55%)  | 36 (37.11%)  |
| Periphery            | 954 (0.30%)       | 403 (42.24%)     | 450 (0.29%)      | 186 (41.33%)    | 395 (0.38%)      | 172 (43.54%)    | 12 (0.39%)     | 3 (25.00%)     | 2 (6.67%)    | 0 (0.00%)    |
| General              | 313 771 (89.06%)  | 122 863 (39.16%) | 153 392 (43.54%) | 59 313 (38.67%) | 105 228 (29.87%) | 45 105 (42.86%) | 3 051 (0.87%)  | 1 191 (39.04%) | 298 (0.08%)  | 109 (36.58%) |
| ICU                  |                   |                  |                  |                 |                  |                 |                |                |              |              |
| Yes                  | 130 286 (40.17%)  | 83 781 (64.31%)  | 62 326 (38.85%)  | 40 214 (64.52%) | 43 413 (41.62%)  | 29 275 (67.43%) | 1 262 (41.27%) | 791 (62.68%)   | 116 (38.93%) | 70 (60.34%)  |
| No                   | 194 025 (59.83%)  | 43 676 (22.51%)  | 98 104 (61.15%)  | 22 321 (22.75%) | 60 904 (58.38%)  | 15 873 (26.06%) | 1 796 (58.73%) | 407 (22.66%)   | 182 (61.07%) | 41 (22.53%)  |
| General              | 324 311 (92.05%)  | 127 457 (39.30%) | 160 430 (45.53%) | 62 535 (38.98%) | 104 317 (29.61%) | 45 148 (43.28%) | 3 058 (0.87%)  | 1 198 (39.18%) | 298 (0.08%)  | 111 (37.25%) |
| Respiratory support  |                   |                  |                  |                 |                  |                 |                |                |              |              |
| Invasive             | 76 341 (24.24%)   | 63 497 (83.18%)  | 37 310 (23.76%)  | 30 579 (81.96%) | 26 388 (25.89%)  | 22 578 (85.56%) | 696 (23.05%)   | 570 (81.90%)   | 72 (24.57%)  | 61 (84.72%)  |
| Non-invasive         | 187 353 (59.48%)  | 53 139 (28.36%)  | 91 213 (60.00%)  | 27 031 (28.69%) | 59 196 (58.08%)  | 18 521 (31.29%) | 1 894 (62.74%) | 558 (29.46%)   | 165 (56.31%) | 43 (26.96%)  |
| No                   | 51 267 (16.28%)   | 7 336 (14.31%)   | 25 507 (16.24%)  | 3 506 (13.75%)  | 16 336 (16.03%)  | 2 888 (17.68%)  | 429 (14.21%)   | 55 (12.87%)    | 56 (19.11%)  | 7 (12.50%)   |
| General              | 314 961 (89.39%)  | 123 972 (39.36%) | 157 030 (44.57%) | 61 116 (38.92%) | 101 920 (28.93%) | 43 987 (43.16%) | 3 019 (0.86%)  | 1 183 (39.19%) | 293 (0.08%)  | 111 (37.88%) |

Table 8: Mortality stratified by sociodemographic characteristics and second wave.

| Epidemiologic week | Cases          | Deaths          |
|--------------------|----------------|-----------------|
| First wave         |                |                 |
| 8                  | 8 (0.00%)      | 2 (25.00%)      |
| 9                  | 26 (0.01%)     | 6 (23.08%)      |
| 10                 | 188 (0.06%)    | 67 (35.64%)     |
| 11                 | 924 (0.28%)    | 276 (29.87%)    |
| 12                 | 2 963 (0.91%)  | 863 (29.13%)    |
| 13                 | 4 427 (1.36%)  | 1 382 (31.22%)  |
| 14                 | 5 402 (1.66%)  | 1 980 (36.65%)  |
| 15                 | 7 192 (2.21%)  | 2 730 (37.96%)  |
| 16                 | 9 973 (3.06%)  | 3 794 (38.04%)  |
| 17                 | 12 520 (3.84%) | 4 895 (39.10%)  |
| 18                 | 14 069 (4.32%) | 5 805 (41.26%)  |
| 19                 | 14 054 (4.31%) | 5 532 (39.36%)  |
| 20                 | 14 825 (4.55%) | 5 644 (38.07%)  |
| 21                 | 13 049 (4.00%) | 4 853 (37.19%)  |
| 22                 | 11 869 (3.64%) | 4 385 (36.94%)  |
| 23                 | 13 462 (4.13%) | 4 839 (35.95%)  |
| 24                 | 13 324 (4.09%) | 4 495 (33.74%)  |
| 25                 | 14 007 (4.30%) | 4 698 (33.54%)  |
| 26                 | 12 761 (3.92%) | 4 306 (33.74%)  |
| 27                 | 14 750 (4.53%) | 4 981 (33.77%)  |
| 28                 | 14 681 (4.50%) | 4 957 (33.76%)  |
| 29                 | 13 302 (4.08%) | 4 528 (34.04%)  |
| 30                 | 12 652 (3.88%) | 4 364 (34.49%)  |
| 31                 | 11 427 (3.51%) | 3 957 (34.63%)  |
| 32                 | 10 250 (3.15%) | 3 417 (33.34%)  |
| 33                 | 10 352 (3.18%) | 3 410 (32.94%)  |
| 34                 | 9 406 (2.89%)  | 3 059 (32.52%)  |
| 35                 | 8 490 (2.61%)  | 2 678 (31.54%)  |
| 36                 | 8 379 (2.57%)  | 2 750 (32.82%)  |
| 37                 | 7 482 (2.30%)  | 2 386 (31.89%)  |
| 38                 | 6 662 (2.04%)  | 2 124 (31.88%)  |
| 39                 | 6 311 (1.94%)  | 1 917 (30.38%)  |
| 40                 | 5 977 (1.83%)  | 1 859 (31.10%)  |
| 41                 | 5 649 (1.73%)  | 1 711 (30.29%)  |
| 42                 | 5 178 (1.59%)  | 1 512 (29.20%)  |
| 43                 | 5 130 (1.57%)  | 1 542 (30.06%)  |
| 44                 | 3 748 (1.15%)  | 1 288 (34.36%)  |
| 45                 | 937 (0.29%)    | 391 (41.73%)    |
| Second wave        |                |                 |
| 45                 | 6 656 (1.89%)  | 1 844 (27.70%)  |
| 46                 | 9 139 (2.59%)  | 2 750 (30.09%)  |
| 47                 | 10 813 (3.07%) | 3 419 (31.62%)  |
| 48                 | 11 040 (3.13%) | 3 606 (32.66%)  |
| 49                 | 12 319 (3.50%) | 4 210 (34.17%)  |
| 50                 | 11 388 (3.23%) | 3 978 (34.93%)  |
| 51                 | 10 209 (2.90%) | 3 583 (35.10%)  |
| 52                 | 11 087 (3.15%) | 3 850 (34.73%)  |
| 53                 | 12 333 (3.50%) | 4 339 (35.18%)  |
| 54                 | 12 926 (3.67%) | 4 459 (34.50%)  |
| 55                 | 11 944 (3.39%) | 4 167 (34.89%)  |
| 56                 | 10 672 (3.03%) | 3 676 (34.45%)  |
| 57                 | 9 830 (2.79%)  | 3 387 (34.46%)  |
| 58                 | 12 284 (3.49%) | 4 414 (35.93%)  |
| 59                 | 14 050 (3.99%) | 5 224 (37.18%)  |
| 60                 | 18 744 (5.32%) | 7 550 (40.28%)  |
| 61                 | 19 941 (5.66%) | 8 420 (42.22%)  |
| 62                 | 27 045 (7.68%) | 12 118 (44.81%) |
| 63                 | 27 154 (7.71%) | 12 494 (46.01%) |
| 64                 | 25 344 (7.19%) | 11 691 (46.13%) |
| 65                 | 18 824 (5.34%) | 8 565 (45.50%)  |
| 66                 | 16 218 (4.60%) | 7 352 (45.33%)  |
| 67                 | 13 704 (3.89%) | 5 913 (43.15%)  |
| 68                 | 9 866 (2.80%)  | 3 970 (40.24%)  |
| 69                 | 5 470 (1.55%)  | 2 343 (42.83%)  |
| 70                 | 974 (0.28%)    | 516 (52.98%)    |

Table 9: Hospitalizations stratified by epidemiologic week

| SARS-CoV-2 variants stratified by epidemiologic week |                 |              |
|------------------------------------------------------|-----------------|--------------|
| Epidemiologic week                                   | Lineage         | Cases        |
| First wave                                           |                 |              |
| 9                                                    | B.1             | 2 (40.00%)   |
| 9                                                    | B.1.1           | 1 (20.00%)   |
| 9                                                    | B.1.1.28        | 0 (0.00%)    |
| 9                                                    | B.1.1.33        | 0 (0.00%)    |
| 9                                                    | B.1.1.7 (Alpha) | 0 (0.00%)    |
| 9                                                    | Other           | 2 (40.00%)   |
| 9                                                    | P.1 (Gamma)     | 0 (0.00%)    |
| 9                                                    | P.1.2           | 0 (0.00%)    |
| 9                                                    | P.2 (Zeta)      | 0 (0.00%)    |
| 10                                                   | B.1             | 5 (22.73%)   |
| 10                                                   | B.1.1           | 9 (40.91%)   |
| 10                                                   | B.1.1.28        | 1 (4.55%)    |
| 10                                                   | B.1.1.33        | 1 (4.55%)    |
| 10                                                   | B.1.1.7 (Alpha) | 0 (0.00%)    |
| 10                                                   | Other           | 6 (27.27%)   |
| 10                                                   | P.1 (Gamma)     | 0 (0.00%)    |
| 10                                                   | P.1.2           | 0 (0.00%)    |
| 10                                                   | P.2 (Zeta)      | 0 (0.00%)    |
| 11                                                   | B.1             | 23 (39.66%)  |
| 11                                                   | B.1.1           | 4 (6.90%)    |
| 11                                                   | B.1.1.28        | 6 (10.34%)   |
| 11                                                   | B.1.1.33        | 11 (18.97%)  |
| 11                                                   | B.1.1.7 (Alpha) | 0 (0.00%)    |
| 11                                                   | Other           | 14 (24.14%)  |
| 11                                                   | P.1 (Gamma)     | 0 (0.00%)    |
| 11                                                   | P.1.2           | 0 (0.00%)    |
| 11                                                   | P.2 (Zeta)      | 0 (0.00%)    |
| 12                                                   | B.1             | 45 (25.42%)  |
| 12                                                   | B.1.1           | 15 (8.47%)   |
| 12                                                   | B.1.1.28        | 48 (27.12%)  |
| 12                                                   | B.1.1.33        | 38 (21.47%)  |
| 12                                                   | B.1.1.7 (Alpha) | 0 (0.00%)    |
| 12                                                   | Other           | 31 (17.51%)  |
| 12                                                   | P.1 (Gamma)     | 0 (0.00%)    |
| 12                                                   | P.1.2           | 0 (0.00%)    |
| 12                                                   | P.2 (Zeta)      | 0 (0.00%)    |
| 13                                                   | B.1             | 26 (13.54%)  |
| 13                                                   | B.1.1           | 10 (5.21%)   |
| 13                                                   | B.1.1.28        | 77 (40.10%)  |
| 13                                                   | B.1.1.33        | 66 (34.38%)  |
| 13                                                   | B.1.1.7 (Alpha) | 0 (0.00%)    |
| 13                                                   | Other           | 13 (6.77%)   |
| 13                                                   | P.1 (Gamma)     | 0 (0.00%)    |
| 13                                                   | P.1.2           | 0 (0.00%)    |
| 13                                                   | P.2 (Zeta)      | 0 (0.00%)    |
| 14                                                   | B.1             | 18 (7.86%)   |
| 14                                                   | B.1.1           | 8 (3.49%)    |
| 14                                                   | B.1.1.28        | 84 (36.68%)  |
| 14                                                   | B.1.1.33        | 97 (42.36%)  |
| 14                                                   | B.1.1.7 (Alpha) | 0 (0.00%)    |
| 14                                                   | Other           | 22 (9.61%)   |
| 14                                                   | P.1 (Gamma)     | 0 (0.00%)    |
| 14                                                   | P.1.2           | 0 (0.00%)    |
| 14                                                   | P.2 (Zeta)      | 0 (0.00%)    |
| 15                                                   | B.1             | 9 (4.46%)    |
| 15                                                   | B.1.1           | 34 (16.83%)  |
| 15                                                   | B.1.1.28        | 67 (33.17%)  |
| 15                                                   | B.1.1.33        | 78 (38.61%)  |
| 15                                                   | B.1.1.7 (Alpha) | 0 (0.00%)    |
| 15                                                   | Other           | 14 (6.93%)   |
| 15                                                   | P.1 (Gamma)     | 0 (0.00%)    |
| 15                                                   | P.1.2           | 0 (0.00%)    |
| 15                                                   | P.2 (Zeta)      | 0 (0.00%)    |
| 16                                                   | B.1             | 10 (3.68%)   |
| 16                                                   | B.1.1           | 15 (5.51%)   |
| 16                                                   | B.1.1.28        | 115 (42.28%) |
| 16                                                   | B.1.1.33        | 114 (41.91%) |
| 16                                                   | B.1.1.7 (Alpha) | 0 (0.00%)    |
| 16                                                   | Other           | 16 (5.88%)   |
| 16                                                   | P.1 (Gamma)     | 0 (0.00%)    |
| 16                                                   | P.1.2           | 0 (0.00%)    |
| 16                                                   | P.2 (Zeta)      | 2 (0.74%)    |
| 17                                                   | B.1             | 16 (5.61%)   |

Continued on next page

**Table 10 – continued from previous page**

| Epidemiologic week | Lineage         | Cases        |
|--------------------|-----------------|--------------|
| 17                 | B.1.1           | 30 (10.53%)  |
| 17                 | B.1.1.28        | 107 (37.54%) |
| 17                 | B.1.1.33        | 121 (42.46%) |
| 17                 | B.1.1.7 (Alpha) | 0 (0.00%)    |
| 17                 | Other           | 11 (3.86%)   |
| 17                 | P.1 (Gamma)     | 0 (0.00%)    |
| 17                 | P.1.2           | 0 (0.00%)    |
| 17                 | P.2 (Zeta)      | 0 (0.00%)    |
| 18                 | B.1             | 9 (5.14%)    |
| 18                 | B.1.1           | 16 (9.14%)   |
| 18                 | B.1.1.28        | 53 (30.29%)  |
| 18                 | B.1.1.33        | 86 (49.14%)  |
| 18                 | B.1.1.7 (Alpha) | 0 (0.00%)    |
| 18                 | Other           | 11 (6.29%)   |
| 18                 | P.1 (Gamma)     | 0 (0.00%)    |
| 18                 | P.1.2           | 0 (0.00%)    |
| 18                 | P.2 (Zeta)      | 0 (0.00%)    |
| 19                 | B.1             | 3 (2.54%)    |
| 19                 | B.1.1           | 20 (16.95%)  |
| 19                 | B.1.1.28        | 39 (33.05%)  |
| 19                 | B.1.1.33        | 51 (43.22%)  |
| 19                 | B.1.1.7 (Alpha) | 0 (0.00%)    |
| 19                 | Other           | 5 (4.24%)    |
| 19                 | P.1 (Gamma)     | 0 (0.00%)    |
| 19                 | P.1.2           | 0 (0.00%)    |
| 19                 | P.2 (Zeta)      | 0 (0.00%)    |
| 20                 | B.1             | 2 (2.35%)    |
| 20                 | B.1.1           | 10 (11.76%)  |
| 20                 | B.1.1.28        | 29 (34.12%)  |
| 20                 | B.1.1.33        | 36 (42.35%)  |
| 20                 | B.1.1.7 (Alpha) | 0 (0.00%)    |
| 20                 | Other           | 8 (9.41%)    |
| 20                 | P.1 (Gamma)     | 0 (0.00%)    |
| 20                 | P.1.2           | 0 (0.00%)    |
| 20                 | P.2 (Zeta)      | 0 (0.00%)    |
| 21                 | B.1             | 1 (1.54%)    |
| 21                 | B.1.1           | 3 (4.62%)    |
| 21                 | B.1.1.28        | 18 (27.69%)  |
| 21                 | B.1.1.33        | 36 (55.38%)  |
| 21                 | B.1.1.7 (Alpha) | 0 (0.00%)    |
| 21                 | Other           | 7 (10.77%)   |
| 21                 | P.1 (Gamma)     | 0 (0.00%)    |
| 21                 | P.1.2           | 0 (0.00%)    |
| 21                 | P.2 (Zeta)      | 0 (0.00%)    |
| 22                 | B.1             | 3 (4.55%)    |
| 22                 | B.1.1           | 5 (7.58%)    |
| 22                 | B.1.1.28        | 14 (21.21%)  |
| 22                 | B.1.1.33        | 38 (57.58%)  |
| 22                 | B.1.1.7 (Alpha) | 0 (0.00%)    |
| 22                 | Other           | 6 (9.09%)    |
| 22                 | P.1 (Gamma)     | 0 (0.00%)    |
| 22                 | P.1.2           | 0 (0.00%)    |
| 22                 | P.2 (Zeta)      | 0 (0.00%)    |
| 23                 | B.1             | 0 (0.00%)    |
| 23                 | B.1.1           | 19 (18.81%)  |
| 23                 | B.1.1.28        | 8 (7.92%)    |
| 23                 | B.1.1.33        | 68 (67.33%)  |
| 23                 | B.1.1.7 (Alpha) | 0 (0.00%)    |
| 23                 | Other           | 6 (5.94%)    |
| 23                 | P.1 (Gamma)     | 0 (0.00%)    |
| 23                 | P.1.2           | 0 (0.00%)    |
| 23                 | P.2 (Zeta)      | 0 (0.00%)    |
| 24                 | B.1             | 0 (0.00%)    |
| 24                 | B.1.1           | 1 (1.89%)    |
| 24                 | B.1.1.28        | 17 (32.08%)  |
| 24                 | B.1.1.33        | 30 (56.60%)  |
| 24                 | B.1.1.7 (Alpha) | 0 (0.00%)    |
| 24                 | Other           | 5 (9.43%)    |
| 24                 | P.1 (Gamma)     | 0 (0.00%)    |
| 24                 | P.1.2           | 0 (0.00%)    |
| 24                 | P.2 (Zeta)      | 0 (0.00%)    |
| 25                 | B.1             | 0 (0.00%)    |
| 25                 | B.1.1           | 2 (2.99%)    |
| 25                 | B.1.1.28        | 28 (41.79%)  |

Continued on next page



**Table 10 – continued from previous page**

| Epidemiologic week | Lineage         | Cases       |
|--------------------|-----------------|-------------|
| 25                 | B.1.1.33        | 35 (52.24%) |
| 25                 | B.1.1.7 (Alpha) | 0 (0.00%)   |
| 25                 | Other           | 2 (2.99%)   |
| 25                 | P.1 (Gamma)     | 0 (0.00%)   |
| 25                 | P.1.2           | 0 (0.00%)   |
| 25                 | P.2 (Zeta)      | 0 (0.00%)   |
| 26                 | B.1             | 1 (1.23%)   |
| 26                 | B.1.1           | 17 (20.99%) |
| 26                 | B.1.1.28        | 29 (35.80%) |
| 26                 | B.1.1.33        | 27 (33.33%) |
| 26                 | B.1.1.7 (Alpha) | 0 (0.00%)   |
| 26                 | Other           | 6 (7.41%)   |
| 26                 | P.1 (Gamma)     | 0 (0.00%)   |
| 26                 | P.1.2           | 0 (0.00%)   |
| 26                 | P.2 (Zeta)      | 1 (1.23%)   |
| 27                 | B.1             | 2 (1.56%)   |
| 27                 | B.1.1           | 28 (21.88%) |
| 27                 | B.1.1.28        | 43 (33.59%) |
| 27                 | B.1.1.33        | 42 (32.81%) |
| 27                 | B.1.1.7 (Alpha) | 0 (0.00%)   |
| 27                 | Other           | 13 (10.16%) |
| 27                 | P.1 (Gamma)     | 0 (0.00%)   |
| 27                 | P.1.2           | 0 (0.00%)   |
| 27                 | P.2 (Zeta)      | 0 (0.00%)   |
| 28                 | B.1             | 1 (1.72%)   |
| 28                 | B.1.1           | 2 (3.45%)   |
| 28                 | B.1.1.28        | 27 (46.55%) |
| 28                 | B.1.1.33        | 24 (41.38%) |
| 28                 | B.1.1.7 (Alpha) | 0 (0.00%)   |
| 28                 | Other           | 4 (6.90%)   |
| 28                 | P.1 (Gamma)     | 0 (0.00%)   |
| 28                 | P.1.2           | 0 (0.00%)   |
| 28                 | P.2 (Zeta)      | 0 (0.00%)   |
| 29                 | B.1             | 0 (0.00%)   |
| 29                 | B.1.1           | 1 (2.94%)   |
| 29                 | B.1.1.28        | 10 (29.41%) |
| 29                 | B.1.1.33        | 18 (52.94%) |
| 29                 | B.1.1.7 (Alpha) | 0 (0.00%)   |
| 29                 | Other           | 5 (14.71%)  |
| 29                 | P.1 (Gamma)     | 0 (0.00%)   |
| 29                 | P.1.2           | 0 (0.00%)   |
| 29                 | P.2 (Zeta)      | 0 (0.00%)   |
| 30                 | B.1             | 9 (17.31%)  |
| 30                 | B.1.1           | 1 (1.92%)   |
| 30                 | B.1.1.28        | 13 (25.00%) |
| 30                 | B.1.1.33        | 22 (42.31%) |
| 30                 | B.1.1.7 (Alpha) | 0 (0.00%)   |
| 30                 | Other           | 6 (11.54%)  |
| 30                 | P.1 (Gamma)     | 0 (0.00%)   |
| 30                 | P.1.2           | 0 (0.00%)   |
| 30                 | P.2 (Zeta)      | 1 (1.92%)   |
| 31                 | B.1             | 0 (0.00%)   |
| 31                 | B.1.1           | 3 (3.09%)   |
| 31                 | B.1.1.28        | 13 (13.40%) |
| 31                 | B.1.1.33        | 74 (76.29%) |
| 31                 | B.1.1.7 (Alpha) | 0 (0.00%)   |
| 31                 | Other           | 7 (7.22%)   |
| 31                 | P.1 (Gamma)     | 0 (0.00%)   |
| 31                 | P.1.2           | 0 (0.00%)   |
| 31                 | P.2 (Zeta)      | 0 (0.00%)   |
| 32                 | B.1             | 0 (0.00%)   |
| 32                 | B.1.1           | 2 (4.26%)   |
| 32                 | B.1.1.28        | 11 (23.40%) |
| 32                 | B.1.1.33        | 30 (63.83%) |
| 32                 | B.1.1.7 (Alpha) | 0 (0.00%)   |
| 32                 | Other           | 4 (8.51%)   |
| 32                 | P.1 (Gamma)     | 0 (0.00%)   |
| 32                 | P.1.2           | 0 (0.00%)   |
| 32                 | P.2 (Zeta)      | 0 (0.00%)   |
| 33                 | B.1             | 21 (23.60%) |
| 33                 | B.1.1           | 7 (7.87%)   |
| 33                 | B.1.1.28        | 24 (26.97%) |
| 33                 | B.1.1.33        | 23 (25.84%) |
| 33                 | B.1.1.7 (Alpha) | 0 (0.00%)   |

Continued on next page

**Table 10 – continued from previous page**

| Epidemiologic week | Lineage         | Cases       |
|--------------------|-----------------|-------------|
| 33                 | Other           | 13 (14.61%) |
| 33                 | P.1 (Gamma)     | 0 (0.00%)   |
| 33                 | P.1.2           | 0 (0.00%)   |
| 33                 | P.2 (Zeta)      | 1 (1.12%)   |
| 34                 | B.1             | 0 (0.00%)   |
| 34                 | B.1.1           | 3 (5.56%)   |
| 34                 | B.1.1.28        | 19 (35.19%) |
| 34                 | B.1.1.33        | 30 (55.56%) |
| 34                 | B.1.1.7 (Alpha) | 0 (0.00%)   |
| 34                 | Other           | 2 (3.70%)   |
| 34                 | P.1 (Gamma)     | 0 (0.00%)   |
| 34                 | P.1.2           | 0 (0.00%)   |
| 34                 | P.2 (Zeta)      | 0 (0.00%)   |
| 35                 | B.1             | 1 (2.44%)   |
| 35                 | B.1.1           | 1 (2.44%)   |
| 35                 | B.1.1.28        | 14 (34.15%) |
| 35                 | B.1.1.33        | 21 (51.22%) |
| 35                 | B.1.1.7 (Alpha) | 0 (0.00%)   |
| 35                 | Other           | 4 (9.76%)   |
| 35                 | P.1 (Gamma)     | 0 (0.00%)   |
| 35                 | P.1.2           | 0 (0.00%)   |
| 35                 | P.2 (Zeta)      | 0 (0.00%)   |
| 36                 | B.1             | 1 (2.00%)   |
| 36                 | B.1.1           | 5 (10.00%)  |
| 36                 | B.1.1.28        | 7 (14.00%)  |
| 36                 | B.1.1.33        | 30 (60.00%) |
| 36                 | B.1.1.7 (Alpha) | 0 (0.00%)   |
| 36                 | Other           | 3 (6.00%)   |
| 36                 | P.1 (Gamma)     | 0 (0.00%)   |
| 36                 | P.1.2           | 0 (0.00%)   |
| 36                 | P.2 (Zeta)      | 4 (8.00%)   |
| 37                 | B.1             | 1 (3.70%)   |
| 37                 | B.1.1           | 0 (0.00%)   |
| 37                 | B.1.1.28        | 11 (40.74%) |
| 37                 | B.1.1.33        | 13 (48.15%) |
| 37                 | B.1.1.7 (Alpha) | 0 (0.00%)   |
| 37                 | Other           | 0 (0.00%)   |
| 37                 | P.1 (Gamma)     | 1 (3.70%)   |
| 37                 | P.1.2           | 0 (0.00%)   |
| 37                 | P.2 (Zeta)      | 1 (3.70%)   |
| 38                 | B.1             | 0 (0.00%)   |
| 38                 | B.1.1           | 2 (4.17%)   |
| 38                 | B.1.1.28        | 18 (37.50%) |
| 38                 | B.1.1.33        | 19 (39.58%) |
| 38                 | B.1.1.7 (Alpha) | 0 (0.00%)   |
| 38                 | Other           | 5 (10.42%)  |
| 38                 | P.1 (Gamma)     | 0 (0.00%)   |
| 38                 | P.1.2           | 0 (0.00%)   |
| 38                 | P.2 (Zeta)      | 4 (8.33%)   |
| 39                 | B.1             | 0 (0.00%)   |
| 39                 | B.1.1           | 8 (17.39%)  |
| 39                 | B.1.1.28        | 11 (23.91%) |
| 39                 | B.1.1.33        | 22 (47.83%) |
| 39                 | B.1.1.7 (Alpha) | 0 (0.00%)   |
| 39                 | Other           | 1 (2.17%)   |
| 39                 | P.1 (Gamma)     | 0 (0.00%)   |
| 39                 | P.1.2           | 0 (0.00%)   |
| 39                 | P.2 (Zeta)      | 4 (8.70%)   |
| 40                 | B.1             | 2 (3.28%)   |
| 40                 | B.1.1           | 5 (8.20%)   |
| 40                 | B.1.1.28        | 22 (36.07%) |
| 40                 | B.1.1.33        | 21 (34.43%) |
| 40                 | B.1.1.7 (Alpha) | 0 (0.00%)   |
| 40                 | Other           | 8 (13.11%)  |
| 40                 | P.1 (Gamma)     | 1 (1.64%)   |
| 40                 | P.1.2           | 0 (0.00%)   |
| 40                 | P.2 (Zeta)      | 2 (3.28%)   |
| 41                 | B.1             | 0 (0.00%)   |
| 41                 | B.1.1           | 2 (4.76%)   |
| 41                 | B.1.1.28        | 16 (38.10%) |
| 41                 | B.1.1.33        | 18 (42.86%) |
| 41                 | B.1.1.7 (Alpha) | 0 (0.00%)   |
| 41                 | Other           | 2 (4.76%)   |
| 41                 | P.1 (Gamma)     | 0 (0.00%)   |

Continued on next page

**Table 10 – continued from previous page**

| Epidemiologic week | Lineage         | Cases       |
|--------------------|-----------------|-------------|
| 41                 | P.1.2           | 0 (0.00%)   |
| 41                 | P.2 (Zeta)      | 4 (9.52%)   |
| 42                 | B.1             | 0 (0.00%)   |
| 42                 | B.1.1           | 3 (7.50%)   |
| 42                 | B.1.1.28        | 14 (35.00%) |
| 42                 | B.1.1.33        | 14 (35.00%) |
| 42                 | B.1.1.7 (Alpha) | 0 (0.00%)   |
| 42                 | Other           | 1 (2.50%)   |
| 42                 | P.1 (Gamma)     | 0 (0.00%)   |
| 42                 | P.1.2           | 0 (0.00%)   |
| 42                 | P.2 (Zeta)      | 8 (20.00%)  |
| 43                 | B.1             | 0 (0.00%)   |
| 43                 | B.1.1           | 3 (6.52%)   |
| 43                 | B.1.1.28        | 18 (39.13%) |
| 43                 | B.1.1.33        | 8 (17.39%)  |
| 43                 | B.1.1.7 (Alpha) | 0 (0.00%)   |
| 43                 | Other           | 3 (6.52%)   |
| 43                 | P.1 (Gamma)     | 0 (0.00%)   |
| 43                 | P.1.2           | 0 (0.00%)   |
| 43                 | P.2 (Zeta)      | 14 (30.43%) |
| 44                 | B.1             | 0 (0.00%)   |
| 44                 | B.1.1           | 1 (1.23%)   |
| 44                 | B.1.1.28        | 28 (34.57%) |
| 44                 | B.1.1.33        | 22 (27.16%) |
| 44                 | B.1.1.7 (Alpha) | 0 (0.00%)   |
| 44                 | Other           | 2 (2.47%)   |
| 44                 | P.1 (Gamma)     | 1 (1.23%)   |
| 44                 | P.1.2           | 0 (0.00%)   |
| 44                 | P.2 (Zeta)      | 27 (33.33%) |
| 45                 | B.1             | 3 (3.23%)   |
| 45                 | B.1.1           | 10 (10.75%) |
| 45                 | B.1.1.28        | 22 (23.66%) |
| 45                 | B.1.1.33        | 15 (16.13%) |
| 45                 | B.1.1.7 (Alpha) | 0 (0.00%)   |
| 45                 | Other           | 12 (12.90%) |
| 45                 | P.1 (Gamma)     | 1 (1.08%)   |
| 45                 | P.1.2           | 0 (0.00%)   |
| 45                 | P.2 (Zeta)      | 30 (32.26%) |
| 46                 | B.1             | 1 (1.25%)   |
| 46                 | B.1.1           | 5 (6.25%)   |
| 46                 | B.1.1.28        | 30 (37.50%) |
| 46                 | B.1.1.33        | 14 (17.50%) |
| 46                 | B.1.1.7 (Alpha) | 0 (0.00%)   |
| 46                 | Other           | 15 (18.75%) |
| 46                 | P.1 (Gamma)     | 0 (0.00%)   |
| 46                 | P.1.2           | 0 (0.00%)   |
| 46                 | P.2 (Zeta)      | 15 (18.75%) |
| 47                 | B.1             | 2 (2.06%)   |
| 47                 | B.1.1           | 4 (4.12%)   |
| 47                 | B.1.1.28        | 41 (42.27%) |
| 47                 | B.1.1.33        | 8 (8.25%)   |
| 47                 | B.1.1.7 (Alpha) | 0 (0.00%)   |
| 47                 | Other           | 9 (9.28%)   |
| 47                 | P.1 (Gamma)     | 3 (3.09%)   |
| 47                 | P.1.2           | 0 (0.00%)   |
| 47                 | P.2 (Zeta)      | 30 (30.93%) |
| 48                 | B.1             | 0 (0.00%)   |
| 48                 | B.1.1           | 4 (2.11%)   |
| 48                 | B.1.1.28        | 71 (37.37%) |
| 48                 | B.1.1.33        | 16 (8.42%)  |
| 48                 | B.1.1.7 (Alpha) | 0 (0.00%)   |
| 48                 | Other           | 12 (6.32%)  |
| 48                 | P.1 (Gamma)     | 0 (0.00%)   |
| 48                 | P.1.2           | 0 (0.00%)   |
| 48                 | P.2 (Zeta)      | 87 (45.79%) |
| 49                 | B.1             | 2 (1.64%)   |
| 49                 | B.1.1           | 5 (4.10%)   |
| 49                 | B.1.1.28        | 46 (37.70%) |
| 49                 | B.1.1.33        | 14 (11.48%) |
| 49                 | B.1.1.7 (Alpha) | 0 (0.00%)   |
| 49                 | Other           | 9 (7.38%)   |
| 49                 | P.1 (Gamma)     | 2 (1.64%)   |
| 49                 | P.1.2           | 0 (0.00%)   |
| 49                 | P.2 (Zeta)      | 44 (36.07%) |

Continued on next page

**Table 10 – continued from previous page**

| Epidemiologic week | Lineage         | Cases        |
|--------------------|-----------------|--------------|
| 50                 | B.1             | 3 (2.19%)    |
| 50                 | B.1.1           | 4 (2.92%)    |
| 50                 | B.1.1.28        | 39 (28.47%)  |
| 50                 | B.1.1.33        | 12 (8.76%)   |
| 50                 | B.1.1.7 (Alpha) | 0 (0.00%)    |
| 50                 | Other           | 18 (13.14%)  |
| 50                 | P.1 (Gamma)     | 2 (1.46%)    |
| 50                 | P.1.2           | 0 (0.00%)    |
| 50                 | P.2 (Zeta)      | 59 (43.07%)  |
| 51                 | B.1             | 1 (0.72%)    |
| 51                 | B.1.1           | 7 (5.04%)    |
| 51                 | B.1.1.28        | 20 (14.39%)  |
| 51                 | B.1.1.33        | 18 (12.95%)  |
| 51                 | B.1.1.7 (Alpha) | 0 (0.00%)    |
| 51                 | Other           | 15 (10.79%)  |
| 51                 | P.1 (Gamma)     | 24 (17.27%)  |
| 51                 | P.1.2           | 0 (0.00%)    |
| 51                 | P.2 (Zeta)      | 54 (38.85%)  |
| 52                 | B.1             | 0 (0.00%)    |
| 52                 | B.1.1           | 9 (5.29%)    |
| 52                 | B.1.1.28        | 23 (13.53%)  |
| 52                 | B.1.1.33        | 5 (2.94%)    |
| 52                 | B.1.1.7 (Alpha) | 4 (2.35%)    |
| 52                 | Other           | 26 (15.29%)  |
| 52                 | P.1 (Gamma)     | 49 (28.82%)  |
| 52                 | P.1.2           | 0 (0.00%)    |
| 52                 | P.2 (Zeta)      | 54 (31.76%)  |
| 53                 | B.1             | 0 (0.00%)    |
| 53                 | B.1.1           | 3 (2.40%)    |
| 53                 | B.1.1.28        | 16 (12.80%)  |
| 53                 | B.1.1.33        | 5 (4.00%)    |
| 53                 | B.1.1.7 (Alpha) | 3 (2.40%)    |
| 53                 | Other           | 14 (11.20%)  |
| 53                 | P.1 (Gamma)     | 29 (23.20%)  |
| 53                 | P.1.2           | 0 (0.00%)    |
| 53                 | P.2 (Zeta)      | 55 (44.00%)  |
| 54                 | B.1             | 0 (0.00%)    |
| 54                 | B.1.1           | 6 (2.27%)    |
| 54                 | B.1.1.28        | 23 (8.71%)   |
| 54                 | B.1.1.33        | 14 (5.30%)   |
| 54                 | B.1.1.7 (Alpha) | 17 (6.44%)   |
| 54                 | Other           | 27 (10.23%)  |
| 54                 | P.1 (Gamma)     | 76 (28.79%)  |
| 54                 | P.1.2           | 0 (0.00%)    |
| 54                 | P.2 (Zeta)      | 101 (38.26%) |
| 55                 | B.1             | 1 (0.43%)    |
| 55                 | B.1.1           | 2 (0.87%)    |
| 55                 | B.1.1.28        | 29 (12.61%)  |
| 55                 | B.1.1.33        | 9 (3.91%)    |
| 55                 | B.1.1.7 (Alpha) | 16 (6.96%)   |
| 55                 | Other           | 21 (9.13%)   |
| 55                 | P.1 (Gamma)     | 43 (18.70%)  |
| 55                 | P.1.2           | 0 (0.00%)    |
| 55                 | P.2 (Zeta)      | 109 (47.39%) |
| 56                 | B.1             | 0 (0.00%)    |
| 56                 | B.1.1           | 1 (0.39%)    |
| 56                 | B.1.1.28        | 24 (9.38%)   |
| 56                 | B.1.1.33        | 11 (4.30%)   |
| 56                 | B.1.1.7 (Alpha) | 12 (4.69%)   |
| 56                 | Other           | 17 (6.64%)   |
| 56                 | P.1 (Gamma)     | 92 (35.94%)  |
| 56                 | P.1.2           | 0 (0.00%)    |
| 56                 | P.2 (Zeta)      | 99 (38.67%)  |
| 57                 | B.1             | 0 (0.00%)    |
| 57                 | B.1.1           | 3 (1.28%)    |
| 57                 | B.1.1.28        | 16 (6.81%)   |
| 57                 | B.1.1.33        | 9 (3.83%)    |
| 57                 | B.1.1.7 (Alpha) | 6 (2.55%)    |
| 57                 | Other           | 11 (4.68%)   |
| 57                 | P.1 (Gamma)     | 76 (32.34%)  |
| 57                 | P.1.2           | 0 (0.00%)    |
| 57                 | P.2 (Zeta)      | 114 (48.51%) |
| 58                 | B.1             | 0 (0.00%)    |
| 58                 | B.1.1           | 6 (2.11%)    |

Continued on next page

**Table 10 – continued from previous page**

| Epidemiologic week | Lineage         | Cases        |
|--------------------|-----------------|--------------|
| 58                 | B.1.1.28        | 37 (12.98%)  |
| 58                 | B.1.1.33        | 4 (1.40%)    |
| 58                 | B.1.1.7 (Alpha) | 3 (1.05%)    |
| 58                 | Other           | 20 (7.02%)   |
| 58                 | P.1 (Gamma)     | 106 (37.19%) |
| 58                 | P.1.2           | 2 (0.70%)    |
| 58                 | P.2 (Zeta)      | 107 (37.54%) |
| 59                 | B.1             | 3 (0.97%)    |
| 59                 | B.1.1           | 16 (5.16%)   |
| 59                 | B.1.1.28        | 27 (8.71%)   |
| 59                 | B.1.1.33        | 1 (0.32%)    |
| 59                 | B.1.1.7 (Alpha) | 10 (3.23%)   |
| 59                 | Other           | 13 (4.19%)   |
| 59                 | P.1 (Gamma)     | 123 (39.68%) |
| 59                 | P.1.2           | 0 (0.00%)    |
| 59                 | P.2 (Zeta)      | 117 (37.74%) |
| 60                 | B.1             | 0 (0.00%)    |
| 60                 | B.1.1           | 14 (6.14%)   |
| 60                 | B.1.1.28        | 15 (6.58%)   |
| 60                 | B.1.1.33        | 1 (0.44%)    |
| 60                 | B.1.1.7 (Alpha) | 8 (3.51%)    |
| 60                 | Other           | 15 (6.58%)   |
| 60                 | P.1 (Gamma)     | 120 (52.63%) |
| 60                 | P.1.2           | 2 (0.88%)    |
| 60                 | P.2 (Zeta)      | 53 (23.25%)  |
| 61                 | B.1             | 2 (0.52%)    |
| 61                 | B.1.1           | 8 (2.09%)    |
| 61                 | B.1.1.28        | 15 (3.92%)   |
| 61                 | B.1.1.33        | 0 (0.00%)    |
| 61                 | B.1.1.7 (Alpha) | 8 (2.09%)    |
| 61                 | Other           | 16 (4.18%)   |
| 61                 | P.1 (Gamma)     | 237 (61.88%) |
| 61                 | P.1.2           | 13 (3.39%)   |
| 61                 | P.2 (Zeta)      | 84 (21.93%)  |
| 62                 | B.1             | 6 (1.55%)    |
| 62                 | B.1.1           | 22 (5.68%)   |
| 62                 | B.1.1.28        | 25 (6.46%)   |
| 62                 | B.1.1.33        | 0 (0.00%)    |
| 62                 | B.1.1.7 (Alpha) | 10 (2.58%)   |
| 62                 | Other           | 18 (4.65%)   |
| 62                 | P.1 (Gamma)     | 265 (68.48%) |
| 62                 | P.1.2           | 7 (1.81%)    |
| 62                 | P.2 (Zeta)      | 34 (8.79%)   |
| 63                 | B.1             | 0 (0.00%)    |
| 63                 | B.1.1           | 2 (0.45%)    |
| 63                 | B.1.1.28        | 9 (2.02%)    |
| 63                 | B.1.1.33        | 0 (0.00%)    |
| 63                 | B.1.1.7 (Alpha) | 20 (4.48%)   |
| 63                 | Other           | 5 (1.12%)    |
| 63                 | P.1 (Gamma)     | 350 (78.48%) |
| 63                 | P.1.2           | 22 (4.93%)   |
| 63                 | P.2 (Zeta)      | 38 (8.52%)   |
| 64                 | B.1             | 0 (0.00%)    |
| 64                 | B.1.1           | 1 (0.30%)    |
| 64                 | B.1.1.28        | 12 (3.59%)   |
| 64                 | B.1.1.33        | 0 (0.00%)    |
| 64                 | B.1.1.7 (Alpha) | 11 (3.29%)   |
| 64                 | Other           | 1 (0.30%)    |
| 64                 | P.1 (Gamma)     | 287 (85.93%) |
| 64                 | P.1.2           | 8 (2.40%)    |
| 64                 | P.2 (Zeta)      | 14 (4.19%)   |
| 65                 | B.1             | 0 (0.00%)    |
| 65                 | B.1.1           | 0 (0.00%)    |
| 65                 | B.1.1.28        | 43 (3.82%)   |
| 65                 | B.1.1.33        | 0 (0.00%)    |
| 65                 | B.1.1.7 (Alpha) | 42 (3.73%)   |
| 65                 | Other           | 7 (0.62%)    |
| 65                 | P.1 (Gamma)     | 941 (83.50%) |
| 65                 | P.1.2           | 18 (1.60%)   |
| 65                 | P.2 (Zeta)      | 76 (6.74%)   |
| 66                 | B.1             | 0 (0.00%)    |
| 66                 | B.1.1           | 0 (0.00%)    |
| 66                 | B.1.1.28        | 19 (3.51%)   |
| 66                 | B.1.1.33        | 0 (0.00%)    |

Continued on next page

**Table 10 – continued from previous page**

| Epidemiologic week | Lineage         | Cases        |
|--------------------|-----------------|--------------|
| 66                 | B.1.1.7 (Alpha) | 24 (4.44%)   |
| 66                 | Other           | 0 (0.00%)    |
| 66                 | P.1 (Gamma)     | 476 (87.99%) |
| 66                 | P.1.2           | 10 (1.85%)   |
| 66                 | P.2 (Zeta)      | 12 (2.22%)   |
| 67                 | B.1             | 0 (0.00%)    |
| 67                 | B.1.1           | 3 (0.29%)    |
| 67                 | B.1.1.28        | 22 (2.09%)   |
| 67                 | B.1.1.33        | 0 (0.00%)    |
| 67                 | B.1.1.7 (Alpha) | 44 (4.18%)   |
| 67                 | Other           | 3 (0.29%)    |
| 67                 | P.1 (Gamma)     | 934 (88.78%) |
| 67                 | P.1.2           | 29 (2.76%)   |
| 67                 | P.2 (Zeta)      | 17 (1.62%)   |
| 68                 | B.1             | 0 (0.00%)    |
| 68                 | B.1.1           | 4 (0.64%)    |
| 68                 | B.1.1.28        | 20 (3.18%)   |
| 68                 | B.1.1.33        | 0 (0.00%)    |
| 68                 | B.1.1.7 (Alpha) | 16 (2.55%)   |
| 68                 | Other           | 1 (0.16%)    |
| 68                 | P.1 (Gamma)     | 564 (89.81%) |
| 68                 | P.1.2           | 16 (2.55%)   |
| 68                 | P.2 (Zeta)      | 7 (1.11%)    |
| 69                 | B.1             | 1 (0.11%)    |
| 69                 | B.1.1           | 1 (0.11%)    |
| 69                 | B.1.1.28        | 20 (2.24%)   |
| 69                 | B.1.1.33        | 0 (0.00%)    |
| 69                 | B.1.1.7 (Alpha) | 33 (3.70%)   |
| 69                 | Other           | 2 (0.22%)    |
| 69                 | P.1 (Gamma)     | 801 (89.80%) |
| 69                 | P.1.2           | 29 (3.25%)   |
| 69                 | P.2 (Zeta)      | 5 (0.56%)    |
| 70                 | B.1             | 0 (0.00%)    |
| 70                 | B.1.1           | 2 (0.38%)    |
| 70                 | B.1.1.28        | 10 (1.90%)   |
| 70                 | B.1.1.33        | 0 (0.00%)    |
| 70                 | B.1.1.7 (Alpha) | 13 (2.47%)   |
| 70                 | Other           | 4 (0.76%)    |
| 70                 | P.1 (Gamma)     | 482 (91.46%) |
| 70                 | P.1.2           | 14 (2.66%)   |
| 70                 | P.2 (Zeta)      | 2 (0.38%)    |

Table 10: SARS-CoV-2 variants stratified by epidemiologic week.

| Age group                                        | Whole pandemic  |                  | First Wave       |                 | Second wave      |                 | Second wave vs first wave |                |
|--------------------------------------------------|-----------------|------------------|------------------|-----------------|------------------|-----------------|---------------------------|----------------|
|                                                  | Cases           | Deaths           | Cases            | Deaths          | Cases            | Deaths          | Difference                | 99.5% CI       |
| Cases with Chronic Cardiovascular Disease        |                 |                  |                  |                 |                  |                 |                           |                |
| 0 to 19                                          | 419 (0.17%)     | 114 (27.21%)     | 242 (0.21%)      | 58 (23.97%)     | 177 (0.14%)      | 56 (31.64%)     | 7.67%                     | -0.94 - 16.39  |
| 20 to 39                                         | 7 853 (3.25%)   | 1 799 (22.91%)   | 3 976 (3.41%)    | 776 (19.52%)    | 3 877 (3.10%)    | 1 023 (26.39%)  | 6.87%                     | 5.01 - 8.72    |
| 40 to 49                                         | 19 784 (8.19%)  | 5 177 (26.17%)   | 9 400 (8.06%)    | 2 097 (22.31%)  | 10 384 (8.30%)   | 3 080 (29.66%)  | 7.35%                     | 6.13 - 8.57    |
| 50 to 59                                         | 41 425 (17.14%) | 13 128 (31.69%)  | 19 564 (16.78%)  | 5 463 (27.92%)  | 21 861 (17.47%)  | 7 665 (35.06%)  | 7.14%                     | 6.25 - 8.03    |
| 60 to 69                                         | 64 313 (26.61%) | 27 994 (43.53%)  | 29 680 (25.46%)  | 11 949 (40.26%) | 34 633 (27.68%)  | 16 045 (46.33%) | 6.07%                     | 5.30 - 6.83    |
| 70 to 79                                         | 61 154 (25.30%) | 32 949 (53.88%)  | 29 063 (24.93%)  | 14 947 (51.43%) | 32 091 (25.65%)  | 18 002 (56.10%) | 4.67%                     | 3.88 - 5.46    |
| 80 +                                             | 46 747 (19.34%) | 29 703 (63.54%)  | 24 638 (21.14%)  | 15 476 (62.81%) | 22 109 (17.67%)  | 14 227 (64.35%) | 1.54%                     | 0.66 - 2.41    |
| Total                                            | 241 695         | 110 864 (45.87%) | 116 563 (48.23%) | 50 766 (43.55%) | 125 132 (51.77%) | 60 098 (48.03%) | 4.48%                     | 4.08 - 4.87    |
| Cases with Diabetes mellitus                     |                 |                  |                  |                 |                  |                 |                           |                |
| 0 to 19                                          | 229 (0.13%)     | 36 (15.72%)      | 143 (0.17%)      | 27 (18.88%)     | 86 (0.10%)       | 9 (10.47%)      | -8.41%                    | -17.10 - 1.53  |
| 20 to 39                                         | 6 007 (3.50%)   | 1 562 (26.00%)   | 3 237 (3.78%)    | 761 (23.51%)    | 2 770 (3.22%)    | 801 (28.92%)    | 5.41%                     | 3.18 - 7.64    |
| 40 to 49                                         | 14 485 (8.43%)  | 4 262 (29.42%)   | 7 508 (8.76%)    | 1 996 (26.58%)  | 6 977 (8.10%)    | 2 266 (32.48%)  | 5.90%                     | 4.41 - 7.38    |
| 50 to 59                                         | 31 992 (18.62%) | 11 202 (35.02%)  | 15 943 (18.60%)  | 5 026 (31.52%)  | 16 049 (18.63%)  | 6 176 (38.48%)  | 6.96%                     | 5.91 - 8.00    |
| 60 to 69                                         | 49 783 (28.97%) | 22 801 (45.80%)  | 23 893 (27.88%)  | 10 299 (43.10%) | 25 890 (30.06%)  | 12 502 (48.29%) | 5.19%                     | 4.31 - 6.06    |
| 70 to 79                                         | 43 532 (25.33%) | 24 123 (55.41%)  | 21 324 (24.88%)  | 11 395 (53.44%) | 22 208 (25.78%)  | 12 728 (57.31%) | 3.87%                     | 2.94 - 4.81    |
| 80 +                                             | 25 817 (15.02%) | 16 686 (64.63%)  | 13 665 (15.94%)  | 8 773 (64.20%)  | 12 152 (14.11%)  | 7 913 (65.12%)  | 0.92%                     | -0.25 - 2.08   |
| Total                                            | 171 845         | 80 672 (46.94%)  | 85 713 (49.88%)  | 38 277 (44.66%) | 86 132 (50.12%)  | 42 395 (49.22%) | 4.56%                     | 4.09 - 5.04    |
| Cases with Obesity                               |                 |                  |                  |                 |                  |                 |                           |                |
| 0 to 19                                          | 224 (0.41%)     | 41 (18.30%)      | 90 (0.45%)       | 15 (16.67%)     | 134 (0.39%)      | 26 (19.40%)     | 2.73%                     | -8.00 - 12.54  |
| 20 to 39                                         | 10 046 (18.58%) | 2 717 (27.05%)   | 3 670 (18.46%)   | 749 (20.41%)    | 6 376 (18.65%)   | 1 968 (30.87%)  | 10.46%                    | 8.71 - 12.17   |
| 40 to 49                                         | 10 818 (20.01%) | 3 582 (33.11%)   | 3 981 (20.03%)   | 1 050 (26.38%)  | 6 837 (20.00%)   | 2 532 (37.03%)  | 10.65%                    | 8.86 - 12.43   |
| 50 to 59                                         | 12 134 (22.44%) | 4 929 (40.62%)   | 4 366 (21.96%)   | 1 463 (33.51%)  | 7 768 (22.72%)   | 3 466 (44.62%)  | 11.11%                    | 9.32 - 12.88   |
| 60 to 69                                         | 11 584 (21.43%) | 6 053 (52.25%)   | 4 154 (20.90%)   | 1 935 (46.58%)  | 7 430 (21.73%)   | 4 118 (55.42%)  | 8.84%                     | 6.95 - 10.73   |
| 70 to 79                                         | 6 545 (12.11%)  | 4 025 (61.50%)   | 2 527 (12.71%)   | 1 481 (58.61%)  | 4 018 (11.75%)   | 2 544 (63.32%)  | 4.71%                     | 2.28 - 7.14    |
| 80 +                                             | 2 715 (5.02%)   | 1 855 (68.32%)   | 1 091 (5.49%)    | 744 (68.19%)    | 1 624 (4.75%)    | 1 111 (68.41%)  | 0.22%                     | -3.33 - 3.81   |
| Total                                            | 54 066          | 23 202 (42.91%)  | 19 879 (36.77%)  | 7 437 (37.41%)  | 34 187 (63.23%)  | 15 765 (46.11%) | 8.70%                     | 7.85 - 9.56    |
| Cases with Chronic Kidney Disease                |                 |                  |                  |                 |                  |                 |                           |                |
| 0 to 19                                          | 151 (0.57%)     | 40 (26.49%)      | 104 (0.70%)      | 27 (25.96%)     | 47 (0.40%)       | 13 (27.66%)     | 1.70%                     | -12.41 - 17.65 |
| 20 to 39                                         | 1 419 (5.35%)   | 495 (34.88%)     | 833 (5.61%)      | 258 (30.97%)    | 586 (5.03%)      | 237 (40.44%)    | 9.47%                     | 4.41 - 14.52   |
| 40 to 49                                         | 2 267 (8.55%)   | 983 (43.36%)     | 1 290 (8.68%)    | 523 (40.54%)    | 977 (8.38%)      | 460 (47.06%)    | 6.54%                     | 2.42 - 10.64   |
| 50 to 59                                         | 4 219 (15.91%)  | 2 173 (51.51%)   | 2 382 (16.03%)   | 1 156 (48.53%)  | 1 837 (15.76%)   | 1 017 (55.36%)  | 6.83%                     | 3.79 - 9.85    |
| 60 to 69                                         | 6 610 (24.93%)  | 4 020 (60.82%)   | 3 661 (24.64%)   | 2 195 (59.96%)  | 2 949 (25.30%)   | 1 825 (61.89%)  | 1.93%                     | -0.44 - 4.29   |
| 70 to 79                                         | 6 636 (25.03%)  | 4 476 (67.45%)   | 3 636 (24.47%)   | 2 388 (65.68%)  | 3 000 (25.73%)   | 2 088 (69.60%)  | 3.92%                     | 1.66 - 6.17    |
| 80 +                                             | 5 214 (19.66%)  | 3 834 (73.53%)   | 2 952 (19.87%)   | 2 148 (72.76%)  | 2 262 (19.40%)   | 1 686 (74.54%)  | 1.78%                     | -0.65 - 4.17   |
| Total                                            | 26 516          | 16 021 (60.42%)  | 14 858 (56.03%)  | 8 695 (58.52%)  | 11 658 (43.97%)  | 7 326 (62.84%)  | 4.32%                     | 3.14 - 5.50    |
| Cases with Chronic Neurological Disease          |                 |                  |                  |                 |                  |                 |                           |                |
| 0 to 19                                          | 577 (2.21%)     | 122 (21.14%)     | 317 (2.21%)      | 57 (17.98%)     | 260 (2.22%)      | 65 (25.00%)     | 7.02%                     | 0.32 - 13.81   |
| 20 to 39                                         | 1 135 (4.36%)   | 388 (34.19%)     | 587 (4.10%)      | 168 (28.62%)    | 548 (4.67%)      | 220 (40.15%)    | 11.53%                    | 6.00 - 16.97   |
| 40 to 49                                         | 1 135 (4.36%)   | 432 (38.06%)     | 571 (3.98%)      | 200 (35.03%)    | 564 (4.81%)      | 232 (41.13%)    | 6.10%                     | 0.46 - 11.71   |
| 50 to 59                                         | 2 178 (8.36%)   | 937 (43.02%)     | 1 111 (7.75%)    | 447 (40.23%)    | 1 067 (9.10%)    | 490 (45.92%)    | 5.69%                     | 1.53 - 9.82    |
| 60 to 69                                         | 3 855 (14.79%)  | 2 031 (52.68%)   | 2 034 (14.19%)   | 1 039 (51.08%)  | 1 821 (15.53%)   | 992 (54.48%)    | 3.40%                     | 0.24 - 6.54    |
| 70 to 79                                         | 6 524 (25.04%)  | 4 030 (61.77%)   | 3 594 (25.07%)   | 2 161 (60.13%)  | 2 930 (24.99%)   | 1 869 (63.79%)  | 3.66%                     | 1.29 - 6.02    |
| 80 +                                             | 10 655 (40.89%) | 7 413 (69.57%)   | 6 120 (42.70%)   | 4 264 (69.67%)  | 4 535 (38.68%)   | 3 149 (69.44%)  | -0.23%                    | -2.01 - 1.53   |
| Total                                            | 26 059          | 15 353 (58.92%)  | 14 334 (55.01%)  | 8 336 (58.16%)  | 11 725 (44.99%)  | 7 017 (59.85%)  | 1.69%                     | 0.49 - 2.89    |
| Cases with Other Chronic Pneumatopathy           |                 |                  |                  |                 |                  |                 |                           |                |
| 0 to 19                                          | 231 (0.92%)     | 35 (15.15%)      | 145 (1.07%)      | 23 (15.86%)     | 86 (0.74%)       | 12 (13.95%)     | -1.91%                    | -10.85 - 8.30  |
| 20 to 39                                         | 865 (3.44%)     | 212 (24.51%)     | 508 (3.77%)      | 113 (22.24%)    | 357 (3.07%)      | 99 (27.73%)     | 5.49%                     | -0.33 - 11.42  |
| 40 to 49                                         | 1 161 (4.62%)   | 383 (32.99%)     | 633 (4.69%)      | 183 (28.91%)    | 528 (4.54%)      | 200 (37.88%)    | 8.97%                     | 3.53 - 14.38   |
| 50 to 59                                         | 2 690 (10.71%)  | 1 127 (41.90%)   | 1 505 (11.16%)   | 604 (40.13%)    | 1 185 (10.19%)   | 523 (44.14%)    | 4.01%                     | 0.25 - 7.75    |
| 60 to 69                                         | 6 034 (24.02%)  | 3 205 (53.12%)   | 3 109 (23.04%)   | 1 634 (52.56%)  | 2 925 (25.15%)   | 1 571 (53.71%)  | 1.15%                     | -1.37 - 3.67   |
| 70 to 79                                         | 7 426 (29.56%)  | 4 544 (61.19%)   | 3 896 (28.88%)   | 2 337 (59.98%)  | 3 530 (30.35%)   | 2 207 (62.52%)  | 2.54%                     | 0.32 - 4.75    |
| 80 +                                             | 6 714 (26.73%)  | 4 676 (69.65%)   | 3 695 (27.39%)   | 2 526 (68.36%)  | 3 019 (25.96%)   | 2 150 (71.22%)  | 2.86%                     | 0.64 - 5.05    |
| Total                                            | 25 121          | 14 182 (56.45%)  | 13 491 (53.70%)  | 7 420 (55.00%)  | 11 630 (46.30%)  | 6 762 (58.14%)  | 3.14%                     | 1.91 - 4.37    |
| Cases with Asthma                                |                 |                  |                  |                 |                  |                 |                           |                |
| 0 to 19                                          | 723 (3.92%)     | 34 (4.70%)       | 470 (5.08%)      | 20 (4.26%)      | 253 (2.75%)      | 14 (5.53%)      | 1.27%                     | -1.86 - 5.12   |
| 20 to 39                                         | 3 207 (17.37%)  | 482 (15.03%)     | 1 663 (17.96%)   | 189 (11.37%)    | 1 544 (16.77%)   | 293 (18.98%)    | 7.61%                     | 5.13 - 10.10   |
| 40 to 49                                         | 3 059 (16.56%)  | 668 (21.84%)     | 1 507 (16.27%)   | 273 (18.12%)    | 1 552 (16.86%)   | 395 (25.45%)    | 7.33%                     | 4.42 - 10.24   |
| 50 to 59                                         | 3 338 (18.08%)  | 900 (26.96%)     | 1 633 (17.63%)   | 389 (23.82%)    | 1 705 (18.52%)   | 511 (29.97%)    | 6.15%                     | 3.14 - 9.14    |
| 60 to 69                                         | 3 488 (18.89%)  | 1 366 (39.16%)   | 1 673 (18.07%)   | 581 (34.73%)    | 1 815 (19.72%)   | 785 (43.25%)    | 8.52%                     | 5.29 - 11.73   |
| 70 to 79                                         | 2 706 (14.65%)  | 1 317 (48.67%)   | 1 293 (13.96%)   | 598 (46.25%)    | 1 413 (15.35%)   | 719 (50.88%)    | 4.63%                     | 0.87 - 8.39    |
| 80 +                                             | 1 946 (10.54%)  | 1 154 (59.30%)   | 1 022 (11.04%)   | 597 (58.41%)    | 924 (10.04%)     | 557 (60.28%)    | 1.87%                     | -2.50 - 6.22   |
| Total                                            | 18 467          | 5 921 (32.06%)   | 9 261 (50.15%)   | 2 647 (28.58%)  | 9 206 (49.85%)   | 3 274 (35.56%)  | 6.98%                     | 5.64 - 8.32    |
| Cases with Immunodeficiency or Immunosuppression |                 |                  |                  |                 |                  |                 |                           |                |
| 0 to 19                                          | 451 (2.57%)     | 115 (25.50%)     | 346 (3.52%)      | 82 (23.70%)     | 105 (1.36%)      | 33 (31.43%)     | 7.73%                     | -1.65 - 18.02  |
| 20 to 39                                         | 1 936 (11.05%)  | 723 (37.35%)     | 1 191 (12.13%)   | 424 (35.60%)    | 745 (9.67%)      | 299 (40.13%)    | 4.53%                     | 0.11 - 8.98    |
| 40 to 49                                         | 2 179 (12.43%)  | 854 (39.19%)     | 1 200 (12.22%)   | 457 (38.08%)    | 979 (12.71%)     | 397 (40.55%)    | 2.47%                     | -1.65 - 6.59   |

Continued on next page

Table 19 – continued from previous page

| Faixa Etária                             | Whole pandemic |                | First Wave     |                | Second wave    |                | Second wave vs first wave |               |
|------------------------------------------|----------------|----------------|----------------|----------------|----------------|----------------|---------------------------|---------------|
|                                          | Cases          | Deaths         | Cases          | Deaths         | Cases          | Deaths         | Difference                | 99.5% CI      |
| 50 to 59                                 | 3 429 (19.57%) | 1 487 (43.37%) | 1 911 (19.46%) | 807 (42.23%)   | 1 518 (19.70%) | 680 (44.80%)   | 2.57%                     | -0.77 - 5.90  |
| 60 to 69                                 | 4 242 (24.21%) | 2 341 (55.19%) | 2 264 (23.05%) | 1 229 (54.28%) | 1 978 (25.67%) | 1 112 (56.22%) | 1.94%                     | -1.07 - 4.93  |
| 70 to 79                                 | 3 216 (18.35%) | 2 030 (63.12%) | 1 781 (18.13%) | 1 105 (62.04%) | 1 435 (18.63%) | 925 (64.46%)   | 2.42%                     | -0.94 - 5.75  |
| 80 +                                     | 2 072 (11.82%) | 1 484 (71.62%) | 1 128 (11.49%) | 804 (71.28%)   | 944 (12.25%)   | 680 (72.03%)   | 0.75%                     | -3.15 - 4.63  |
| Total                                    | 17 525         | 9 034 (51.55%) | 9 821 (56.04%) | 4 908 (49.97%) | 7 704 (43.96%) | 4 126 (53.56%) | 3.59%                     | 2.09 - 5.07   |
| Cases with Chronic Liver Disease         |                |                |                |                |                |                |                           |               |
| 0 to 19                                  | 58 (0.99%)     | 17 (29.31%)    | 31 (0.98%)     | 7 (22.58%)     | 27 (0.99%)     | 10 (37.04%)    | 14.46%                    | -8.72 - 36.28 |
| 20 to 39                                 | 372 (6.32%)    | 145 (38.98%)   | 214 (6.78%)    | 76 (35.51%)    | 158 (5.80%)    | 69 (43.67%)    | 8.16%                     | -1.84 - 18.06 |
| 40 to 49                                 | 690 (11.73%)   | 297 (43.04%)   | 369 (11.68%)   | 159 (43.09%)   | 321 (11.78%)   | 138 (42.99%)   | -0.10%                    | -7.45 - 7.28  |
| 50 to 59                                 | 1 349 (22.93%) | 687 (50.93%)   | 706 (22.36%)   | 354 (50.14%)   | 643 (23.59%)   | 333 (51.79%)   | 1.65%                     | -3.69 - 6.96  |
| 60 to 69                                 | 1 636 (27.80%) | 956 (58.44%)   | 835 (26.44%)   | 474 (56.77%)   | 801 (29.38%)   | 482 (60.17%)   | 3.40%                     | -1.37 - 8.16  |
| 70 to 79                                 | 1 169 (19.87%) | 781 (66.81%)   | 641 (20.30%)   | 434 (67.71%)   | 528 (19.37%)   | 347 (65.72%)   | -1.99%                    | -7.42 - 3.42  |
| 80 +                                     | 610 (10.37%)   | 458 (75.08%)   | 362 (11.46%)   | 280 (77.35%)   | 248 (9.10%)    | 178 (71.77%)   | -5.58%                    | -12.71 - 1.39 |
| Total                                    | 5 884          | 3 341 (56.78%) | 3 158 (53.67%) | 1 784 (56.49%) | 2 726 (46.33%) | 1 557 (57.12%) | 0.63%                     | -1.91 - 3.16  |
| Cases with Chronic Hematological Disease |                |                |                |                |                |                |                           |               |
| 0 to 19                                  | 228 (4.44%)    | 45 (19.74%)    | 160 (5.45%)    | 28 (17.50%)    | 68 (3.09%)     | 17 (25.00%)    | 7.50%                     | -3.49 - 20.03 |
| 20 to 39                                 | 569 (11.09%)   | 180 (31.63%)   | 342 (11.66%)   | 106 (30.99%)   | 227 (10.33%)   | 74 (32.60%)    | 1.61%                     | -6.08 - 9.48  |
| 40 to 49                                 | 511 (9.96%)    | 182 (35.62%)   | 291 (9.92%)    | 98 (33.68%)    | 220 (10.01%)   | 84 (38.18%)    | 4.50%                     | -3.83 - 12.88 |
| 50 to 59                                 | 822 (16.02%)   | 330 (40.15%)   | 437 (14.89%)   | 168 (38.44%)   | 385 (17.52%)   | 162 (42.08%)   | 3.64%                     | -3.07 - 10.31 |
| 60 to 69                                 | 1 134 (22.10%) | 614 (54.14%)   | 621 (21.17%)   | 333 (53.62%)   | 513 (23.34%)   | 281 (54.78%)   | 1.16%                     | -4.66 - 6.95  |
| 70 to 79                                 | 1 060 (20.65%) | 629 (59.34%)   | 621 (21.17%)   | 359 (57.81%)   | 439 (19.97%)   | 270 (61.50%)   | 3.69%                     | -2.31 - 9.61  |
| 80 +                                     | 808 (15.74%)   | 552 (68.32%)   | 462 (15.75%)   | 308 (66.67%)   | 346 (15.74%)   | 244 (70.52%)   | 3.85%                     | -2.65 - 10.20 |
| Total                                    | 5 132          | 2 532 (49.34%) | 2 934 (57.17%) | 1 400 (47.72%) | 2 198 (42.83%) | 1 132 (51.50%) | 3.78%                     | 1.02 - 6.54   |
| Cases with Down syndrome                 |                |                |                |                |                |                |                           |               |
| 0 to 19                                  | 157 (8.61%)    | 38 (24.20%)    | 74 (8.57%)     | 14 (18.92%)    | 83 (8.65%)     | 24 (28.92%)    | 10.00%                    | -3.51 - 22.80 |
| 20 to 39                                 | 438 (24.03%)   | 181 (41.32%)   | 192 (22.25%)   | 69 (35.94%)    | 246 (25.62%)   | 112 (45.53%)   | 9.59%                     | 0.30 - 18.57  |
| 40 to 49                                 | 256 (14.04%)   | 111 (43.36%)   | 119 (13.79%)   | 47 (39.50%)    | 137 (14.27%)   | 64 (46.72%)    | 7.22%                     | -4.91 - 18.99 |
| 50 to 59                                 | 311 (17.06%)   | 123 (39.55%)   | 153 (17.73%)   | 58 (37.91%)    | 158 (16.46%)   | 65 (41.14%)    | 3.23%                     | -7.57 - 13.91 |
| 60 to 69                                 | 288 (15.80%)   | 138 (47.92%)   | 133 (15.41%)   | 61 (45.86%)    | 155 (16.15%)   | 77 (49.68%)    | 3.82%                     | -7.68 - 15.14 |
| 70 to 79                                 | 231 (12.67%)   | 120 (51.95%)   | 110 (12.75%)   | 59 (53.64%)    | 121 (12.60%)   | 61 (50.41%)    | -3.23%                    | -15.83 - 9.54 |
| 80 +                                     | 142 (7.79%)    | 86 (60.56%)    | 82 (9.50%)     | 45 (54.88%)    | 60 (6.25%)     | 41 (68.33%)    | 13.45%                    | -2.80 - 28.38 |
| Total                                    | 1 823          | 797 (43.72%)   | 863 (47.34%)   | 353 (40.90%)   | 960 (52.66%)   | 444 (46.25%)   | 5.35%                     | 0.79 - 9.87   |
| Cases with Puerperal                     |                |                |                |                |                |                |                           |               |
| 0 to 19                                  | 106 (7.10%)    | 12 (11.32%)    | 68 (8.37%)     | 6 (8.82%)      | 38 (5.59%)     | 6 (15.79%)     | 6.97%                     | -5.40 - 22.33 |
| 20 to 39                                 | 1 244 (83.38%) | 268 (21.54%)   | 661 (81.40%)   | 102 (15.43%)   | 583 (85.74%)   | 166 (28.47%)   | 13.04%                    | 8.45 - 17.62  |
| 40 to 49                                 | 142 (9.52%)    | 27 (19.01%)    | 83 (10.22%)    | 12 (14.46%)    | 59 (8.68%)     | 15 (25.42%)    | 10.96%                    | -2.12 - 24.71 |
| 50 to 59                                 | 0 (0.00%)      | 0 (0%)         | 0 (0.00%)      | 0 (0%)         | 0 (0.00%)      | 0 (0%)         | -                         | -             |
| 60 to 69                                 | 0 (0.00%)      | 0 (0%)         | 0 (0.00%)      | 0 (0%)         | 0 (0.00%)      | 0 (0%)         | -                         | -             |
| 70 to 79                                 | 0 (0.00%)      | 0 (0%)         | 0 (0.00%)      | 0 (0%)         | 0 (0.00%)      | 0 (0%)         | -                         | -             |
| 80 +                                     | 0 (0.00%)      | 0 (0%)         | 0 (0.00%)      | 0 (0%)         | 0 (0.00%)      | 0 (0%)         | -                         | -             |
| Total                                    | 1 492          | 307 (20.58%)   | 812 (54.42%)   | 120 (14.78%)   | 680 (45.58%)   | 187 (27.50%)   | 12.72%                    | 8.58 - 16.88  |

Table 19: Risk factors stratified by age group and wave.



| Federative unit     | First wave | Second wave |
|---------------------|------------|-------------|
| Acre                | 116.830    | 132.700     |
| Alagoas             | 68.390     | 55.110      |
| Amapá               | 34.930     | 14.040      |
| Amazonas            | 105.070    | 114.430     |
| Bahia               | 78.740     | 77.800      |
| Ceará               | 121.250    | 104.770     |
| Distrito Federal    | 383.750    | 294.260     |
| Espírito Santo      | 78.170     | 61.320      |
| Goiás               | 167.830    | 151.470     |
| Maranhão            | 27.250     | 9.230       |
| Mato Grosso         | 62.560     | 45.830      |
| Mato Grosso do Sul  | 157.690    | 221.190     |
| Minas Gerais        | 110.390    | 183.670     |
| Paraná              | 160.800    | 307.920     |
| Paraíba             | 77.290     | 123.780     |
| Pará                | 82.810     | 54.400      |
| Pernambuco          | 158.780    | 39.920      |
| Piauí               | 114.580    | 53.660      |
| Rio Grande do Norte | 86.190     | 106.700     |
| Rio Grande do Sul   | 163.060    | 284.870     |
| Rio de Janeiro      | 171.760    | 143.490     |
| Rondônia            | 69.470     | 80.490      |
| Roraima             | 79.690     | 76.210      |
| Santa Catarina      | 99.220     | 139.980     |
| Sergipe             | 95.740     | 107.170     |
| São Paulo           | 268.870    | 272.330     |
| Tocantins           | 65.210     | 39.110      |

Table 11: Hospitalizations per 100,000 inhabitants in each state of Brazil.

| Federative unit     | First wave | Second wave |
|---------------------|------------|-------------|
| Acre                | 908.700    | 1032.170    |
| Alagoas             | 591.790    | 476.890     |
| Amapá               | 299.500    | 120.400     |
| Amazonas            | 1259.540   | 1371.790    |
| Bahia               | 635.870    | 628.300     |
| Ceará               | 888.280    | 767.540     |
| Distrito Federal    | 2618.720   | 2008.040    |
| Espírito Santo      | 624.780    | 490.070     |
| Goiás               | 1052.450   | 949.840     |
| Maranhão            | 195.700    | 66.310      |
| Mato Grosso         | 499.430    | 365.860     |
| Mato Grosso do Sul  | 1251.770   | 1755.860    |
| Minas Gerais        | 833.300    | 1386.460    |
| Paraná              | 1001.510   | 1917.850    |
| Paraíba             | 541.540    | 867.300     |
| Pará                | 774.120    | 508.550     |
| Pernambuco          | 1022.980   | 257.200     |
| Piauí               | 757.450    | 354.750     |
| Rio Grande do Norte | 629.340    | 779.130     |
| Rio Grande do Sul   | 907.390    | 1585.280    |
| Rio de Janeiro      | 1308.810   | 1093.370    |
| Rondônia            | 407.710    | 472.390     |
| Roraima             | 476.330    | 455.490     |
| Santa Catarina      | 727.680    | 1026.600    |
| Sergipe             | 1182.110   | 1323.220    |
| São Paulo           | 1993.230   | 2018.910    |
| Tocantins           | 676.450    | 405.740     |

Table 12: Hospitalizations per 1000 hospital beds in each state of Brazil.

| Federative unit     | First wave | Second wave |
|---------------------|------------|-------------|
| Acre                | 158.060    | 287.100     |
| Alagoas             | 2660.630   | 1493.210    |
| Amapá               | 845.160    | 516.130     |
| Amazonas            | 2836.650   | 3139.440    |
| Bahia               | 2704.210   | 2638.870    |
| Ceará               | 2448.210   | 2391.940    |
| Distrito Federal    | 5460.980   | 4268.910    |
| Espírito Santo      | 1591.860   | 1883.260    |
| Goiás               | 3112.950   | 2938.610    |
| Maranhão            | 511.310    | 410.630     |
| Mato Grosso         | 979.900    | 726.130     |
| Mato Grosso do Sul  | 2873.210   | 5495.220    |
| Minas Gerais        | 1805.600   | 2970.130    |
| Paraná              | 3875.350   | 7353.070    |
| Paraíba             | 2380.530   | 4076.110    |
| Pará                | 1690.840   | 1645.510    |
| Pernambuco          | 1655.210   | 659.220     |
| Piauí               | 2693.650   | 1192.560    |
| Rio Grande do Norte | 1884.960   | 2637.170    |
| Rio Grande do Sul   | 3060.990   | 5119.470    |
| Rio de Janeiro      | 4692.540   | 3672.560    |
| Rondônia            | 1633.330   | 2074.360    |
| Roraima             | 1187.500   | 1552.080    |
| Santa Catarina      | 1801.730   | 2207.640    |
| Sergipe             | 1850.700   | 2752.110    |
| São Paulo           | 4641.320   | 4930.900    |
| Tocantins           | 913.670    | 942.450     |

Table 13: Hospitalizations per 1000 ICU beds in each state of Brazil.

| Federative unit     | First wave | Second wave |
|---------------------|------------|-------------|
| Acre                | 337.800    | 394.270     |
| Alagoas             | 537.090    | 356.790     |
| Amapá               | 571.430    | 454.550     |
| Amazonas            | 498.760    | 518.380     |
| Bahia               | 414.170    | 377.750     |
| Ceará               | 453.540    | 528.730     |
| Distrito Federal    | 282.330    | 356.840     |
| Espírito Santo      | 551.780    | 609.550     |
| Goiás               | 369.210    | 424.870     |
| Maranhão            | 509.540    | 540.330     |
| Mato Grosso         | 302.810    | 344.680     |
| Mato Grosso do Sul  | 290.070    | 489.380     |
| Minas Gerais        | 313.210    | 385.290     |
| Paraná              | 290.130    | 347.010     |
| Paraíba             | 516.340    | 478         |
| Pará                | 455.610    | 550.970     |
| Pernambuco          | 431.860    | 488.670     |
| Piauí               | 337.770    | 404.320     |
| Rio Grande do Norte | 420.220    | 464.070     |
| Rio Grande do Sul   | 311.020    | 421.040     |
| Rio de Janeiro      | 462.340    | 476.820     |
| Rondônia            | 436.700    | 495.160     |
| Roraima             | 481.110    | 511.430     |
| Santa Catarina      | 298.360    | 375.790     |
| Sergipe             | 616.220    | 685.310     |
| São Paulo           | 288.870    | 339.760     |
| Tocantins           | 522.660    | 728.300     |

Table 14: Deaths per 1000 hospitalizations in each state of Brazil.

| Federative unit     | First wave | Second wave |
|---------------------|------------|-------------|
| Acre                | 571.430    | 842.700     |
| Alagoas             | 809.520    | 677.270     |
| Amapá               | 709.920    | 575         |
| Amazonas            | 783.710    | 813.450     |
| Bahia               | 577.420    | 568.100     |
| Ceará               | 667.280    | 778.400     |
| Distrito Federal    | 459.440    | 586.610     |
| Espírito Santo      | 691.870    | 653.530     |
| Goiás               | 609.150    | 645.500     |
| Maranhão            | 719.030    | 763.090     |
| Mato Grosso         | 524.360    | 605.540     |
| Mato Grosso do Sul  | 664.450    | 850.240     |
| Minas Gerais        | 553.310    | 689.660     |
| Paraná              | 538.500    | 678.610     |
| Paraíba             | 808.920    | 765.960     |
| Pará                | 778.020    | 885.400     |
| Pernambuco          | 670.240    | 694.180     |
| Piauí               | 713.240    | 777.980     |
| Rio Grande do Norte | 640.850    | 714.770     |
| Rio Grande do Sul   | 556.910    | 708.960     |
| Rio de Janeiro      | 566.830    | 610.400     |
| Rondônia            | 712.720    | 761.430     |
| Roraima             | 789.470    | 852.350     |
| Santa Catarina      | 513.410    | 650.880     |
| Sergipe             | 713.850    | 885.360     |
| São Paulo           | 498.190    | 560.020     |
| Tocantins           | 862.200    | 900.760     |

Table 15: Deaths per 1000 hospitalizations in ICU in each state of Brazil.

| Federative unit     | First wave | Second wave |
|---------------------|------------|-------------|
| Acre                | 306.960    | 406.960     |
| Alagoas             | 317.840    | 170.150     |
| Amapá               | 171.140    | 54.730      |
| Amazonas            | 628.210    | 711.110     |
| Bahia               | 263.360    | 237.340     |
| Ceará               | 402.870    | 405.820     |
| Distrito Federal    | 739.330    | 716.550     |
| Espírito Santo      | 344.740    | 298.720     |
| Goiás               | 388.580    | 403.560     |
| Maranhão            | 99.720     | 35.830      |
| Mato Grosso         | 151.230    | 126.100     |
| Mato Grosso do Sul  | 363.100    | 859.280     |
| Minas Gerais        | 261        | 534.190     |
| Paraná              | 290.570    | 665.510     |
| Paraíba             | 279.620    | 414.570     |
| Pará                | 352.690    | 280.200     |
| Pernambuco          | 441.780    | 125.690     |
| Piauí               | 255.840    | 143.430     |
| Rio Grande do Norte | 264.460    | 361.570     |
| Rio Grande do Sul   | 282.210    | 667.460     |
| Rio de Janeiro      | 605.110    | 521.350     |
| Rondônia            | 178.050    | 233.910     |
| Roraima             | 229.170    | 232.950     |
| Santa Catarina      | 217.110    | 385.780     |
| Sergipe             | 728.430    | 906.820     |
| São Paulo           | 575.780    | 685.940     |
| Tocantins           | 353.560    | 295.500     |

Table 16: Deaths per 1000 hospital beds in each state of Brazil.

| Federative unit     | First wave | Second wave |
|---------------------|------------|-------------|
| Acre                | 90.320     | 241.940     |
| Alagoas             | 2153.850   | 1011.310    |
| Amapá               | 600        | 296.770     |
| Amazonas            | 2223.110   | 2553.780    |
| Bahia               | 1561.480   | 1499.140    |
| Ceará               | 1633.630   | 1861.890    |
| Distrito Federal    | 2509       | 2504.200    |
| Espírito Santo      | 1101.360   | 1230.770    |
| Goiás               | 1896.260   | 1896.870    |
| Maranhão            | 367.650    | 313.350     |
| Mato Grosso         | 513.820    | 439.700     |
| Mato Grosso do Sul  | 1909.090   | 4672.250    |
| Minas Gerais        | 999.050    | 2048.360    |
| Paraná              | 2086.860   | 4989.850    |
| Paraíba             | 1925.660   | 3122.120    |
| Pará                | 1315.500   | 1456.940    |
| Pernambuco          | 1109.390   | 457.620     |
| Piauí               | 1921.230   | 927.790     |
| Rio Grande do Norte | 1207.960   | 1884.960    |
| Rio Grande do Sul   | 1704.680   | 3629.490    |
| Rio de Janeiro      | 2659.880   | 2241.740    |
| Rondônia            | 1164.100   | 1579.490    |
| Roraima             | 937.500    | 1322.920    |
| Santa Catarina      | 925.020    | 1436.910    |
| Sergipe             | 1321.130   | 2436.620    |
| São Paulo           | 2312.280   | 2761.400    |
| Tocantins           | 787.770    | 848.920     |

Table 17: Deaths per 1000 ICU beds in each state of Brazil.

| Federative unit     | Hospital beds | ICU beds |
|---------------------|---------------|----------|
| Acre                | 128.570       | 34.660   |
| Alagoas             | 115.560       | 13.190   |
| Amapá               | 116.620       | 17.990   |
| Amazonas            | 83.420        | 11.930   |
| Bahia               | 123.830       | 15.580   |
| Ceará               | 136.500       | 17.020   |
| Distrito Federal    | 146.540       | 27.270   |
| Espírito Santo      | 125.120       | 27.190   |
| Goiás               | 159.470       | 22.900   |
| Maranhão            | 139.260       | 12.430   |
| Mato Grosso         | 125.260       | 22.570   |
| Mato Grosso do Sul  | 125.970       | 14.880   |
| Minas Gerais        | 132.470       | 19.810   |
| Paraná              | 160.560       | 15.390   |
| Paraíba             | 142.720       | 13.990   |
| Pará                | 106.980       | 12.690   |
| Pernambuco          | 155.210       | 18.160   |
| Piauí               | 151.270       | 13.930   |
| Rio Grande do Norte | 136.950       | 19.180   |
| Rio Grande do Sul   | 179.700       | 20.960   |
| Rio de Janeiro      | 131.240       | 14.980   |
| Rondônia            | 170.390       | 21.710   |
| Roraima             | 167.310       | 15.210   |
| Santa Catarina      | 136.350       | 19.120   |
| Sergipe             | 80.990        | 15.310   |
| São Paulo           | 134.890       | 19.320   |
| Tocantins           | 96.400        | 17.480   |

Table 18: Hospital and ICU beds per 100,000 inhabitants in each state of Brazil.



| Age group                                                                              | Whole pandemic |                | First Wave     |              | Second wave    |              | Second wave vs first wave |                |
|----------------------------------------------------------------------------------------|----------------|----------------|----------------|--------------|----------------|--------------|---------------------------|----------------|
|                                                                                        | Cases          | Deaths         | Cases          | Deaths       | Cases          | Deaths       | Difference                | 99.5% CI       |
| <b>Mortality with Other Chronic Pneumatopathy, and Asthma</b>                          |                |                |                |              |                |              |                           |                |
| 0 to 19                                                                                | 30 (1.65%)     | 2 (6.67%)      | 20 (2.06%)     | 2 (10.00%)   | 10 (1.17%)     | 0 (0.00%)    | -10.00%                   | -30.10 - 18.68 |
| 20 to 39                                                                               | 129 (7.08%)    | 27 (20.93%)    | 66 (6.80%)     | 12 (18.18%)  | 63 (7.39%)     | 15 (23.81%)  | 5.63%                     | -8.44 - 19.61  |
| 40 to 49                                                                               | 145 (7.96%)    | 52 (35.86%)    | 79 (8.14%)     | 22 (27.85%)  | 66 (7.75%)     | 30 (45.45%)  | 17.60%                    | 1.93 - 32.36   |
| 50 to 59                                                                               | 283 (15.53%)   | 98 (34.63%)    | 152 (15.67%)   | 45 (29.61%)  | 131 (15.38%)   | 53 (40.46%)  | 10.85%                    | -0.25 - 21.71  |
| 60 to 69                                                                               | 426 (23.38%)   | 210 (49.30%)   | 219 (22.58%)   | 107 (48.86%) | 207 (24.30%)   | 103 (49.76%) | 0.90%                     | -8.52 - 10.30  |
| 70 to 79                                                                               | 430 (23.60%)   | 237 (55.12%)   | 229 (23.61%)   | 121 (52.84%) | 201 (23.59%)   | 116 (57.71%) | 4.87%                     | -4.52 - 14.12  |
| 80 +                                                                                   | 379 (20.80%)   | 240 (63.32%)   | 205 (21.13%)   | 128 (62.44%) | 174 (20.42%)   | 112 (64.37%) | 1.93%                     | -7.78 - 11.50  |
| Total                                                                                  | 1 822          | 866 (47.53%)   | 970 (53.24%)   | 437 (45.05%) | 852 (46.76%)   | 429 (50.35%) | 5.30%                     | 0.71 - 9.87    |
| <b>Mortality with Chronic Neurological Disease, and Other Chronic Pneumatopathy</b>    |                |                |                |              |                |              |                           |                |
| 0 to 19                                                                                | 45 (2.12%)     | 10 (22.22%)    | 31 (2.53%)     | 5 (16.13%)   | 14 (1.56%)     | 5 (35.71%)   | 19.58%                    | -5.86 - 46.66  |
| 20 to 39                                                                               | 53 (2.50%)     | 29 (54.72%)    | 28 (2.29%)     | 8 (28.57%)   | 25 (2.79%)     | 21 (84.00%)  | 55.43%                    | 29.17 - 71.84  |
| 40 to 49                                                                               | 53 (2.50%)     | 19 (35.85%)    | 25 (2.04%)     | 10 (40.00%)  | 28 (3.12%)     | 9 (32.14%)   | -7.86%                    | -31.79 - 17.01 |
| 50 to 59                                                                               | 146 (6.88%)    | 70 (47.95%)    | 75 (6.12%)     | 37 (49.33%)  | 71 (7.92%)     | 33 (46.48%)  | -2.85%                    | -18.54 - 13.05 |
| 60 to 69                                                                               | 351 (16.55%)   | 193 (54.99%)   | 194 (15.84%)   | 107 (55.15%) | 157 (17.52%)   | 86 (54.78%)  | -0.37%                    | -10.75 - 9.96  |
| 70 to 79                                                                               | 616 (29.04%)   | 417 (67.69%)   | 361 (29.47%)   | 248 (68.70%) | 255 (28.46%)   | 169 (66.27%) | -2.43%                    | -9.97 - 5.00   |
| 80 +                                                                                   | 857 (40.41%)   | 644 (75.15%)   | 511 (41.71%)   | 394 (77.10%) | 346 (38.62%)   | 250 (72.25%) | -4.85%                    | -10.87 - 1.03  |
| Total                                                                                  | 2 121          | 1 382 (65.16%) | 1 225 (57.76%) | 809 (66.04%) | 896 (42.24%)   | 573 (63.95%) | -2.09%                    | -6.21 - 2.00   |
| <b>Mortality with Chronic Kidney Disease, and Immunodeficiency or Immunodepression</b> |                |                |                |              |                |              |                           |                |
| 0 to 19                                                                                | 27 (1.19%)     | 9 (33.33%)     | 23 (1.64%)     | 8 (34.78%)   | 4 (0.46%)      | 1 (25.00%)   | -9.78%                    | -38.61 - 37.91 |
| 20 to 39                                                                               | 239 (10.53%)   | 90 (37.66%)    | 158 (11.26%)   | 54 (34.18%)  | 81 (9.35%)     | 36 (44.44%)  | 10.26%                    | -2.61 - 23.13  |
| 40 to 49                                                                               | 296 (13.05%)   | 129 (43.58%)   | 182 (12.97%)   | 78 (42.86%)  | 114 (13.16%)   | 51 (44.74%)  | 1.88%                     | -9.54 - 13.38  |
| 50 to 59                                                                               | 520 (22.92%)   | 263 (50.58%)   | 323 (23.02%)   | 154 (47.68%) | 197 (22.75%)   | 109 (55.33%) | 7.65%                     | -1.20 - 16.31  |
| 60 to 69                                                                               | 576 (25.39%)   | 362 (62.85%)   | 341 (24.31%)   | 216 (63.34%) | 235 (27.14%)   | 146 (62.13%) | -1.21%                    | -9.26 - 6.72   |
| 70 to 79                                                                               | 380 (16.75%)   | 261 (68.68%)   | 234 (16.68%)   | 163 (69.66%) | 146 (16.86%)   | 98 (67.12%)  | -2.54%                    | -12.24 - 6.87  |
| 80 +                                                                                   | 231 (10.18%)   | 178 (77.06%)   | 142 (10.12%)   | 106 (74.65%) | 89 (10.28%)    | 72 (80.90%)  | 6.25%                     | -5.12 - 16.57  |
| Total                                                                                  | 2 269          | 1 292 (56.94%) | 1 403 (61.83%) | 779 (55.52%) | 866 (38.17%)   | 513 (59.24%) | 3.72%                     | -0.48 - 7.86   |
| <b>Mortality with Chronic Kidney Disease, and Other Chronic Pneumatopathy</b>          |                |                |                |              |                |              |                           |                |
| 0 to 19                                                                                | 6 (0.30%)      | 2 (33.33%)     | 4 (0.35%)      | 1 (25.00%)   | 2 (0.24%)      | 1 (50.00%)   | 25.00%                    | -35.53 - 70.41 |
| 20 to 39                                                                               | 41 (2.06%)     | 17 (41.46%)    | 21 (1.83%)     | 6 (28.57%)   | 20 (2.39%)     | 11 (55.00%)  | 26.43%                    | -3.40 - 50.63  |
| 40 to 49                                                                               | 63 (3.17%)     | 29 (46.03%)    | 35 (3.05%)     | 16 (45.71%)  | 28 (3.34%)     | 13 (46.43%)  | 0.72%                     | -22.62 - 24.12 |
| 50 to 59                                                                               | 169 (8.51%)    | 92 (54.44%)    | 107 (9.32%)    | 57 (53.27%)  | 62 (7.40%)     | 35 (56.45%)  | 3.18%                     | -12.21 - 18.12 |
| 60 to 69                                                                               | 451 (22.71%)   | 295 (65.41%)   | 257 (22.39%)   | 167 (64.98%) | 194 (23.15%)   | 128 (65.98%) | 1.00%                     | -7.89 - 9.71   |
| 70 to 79                                                                               | 638 (32.12%)   | 445 (69.75%)   | 368 (32.06%)   | 252 (68.48%) | 270 (32.22%)   | 193 (71.48%) | 3.00%                     | -4.25 - 10.05  |
| 80 +                                                                                   | 618 (31.12%)   | 464 (75.08%)   | 356 (31.01%)   | 264 (74.16%) | 262 (31.26%)   | 200 (76.34%) | 2.18%                     | -4.79 - 8.92   |
| Total                                                                                  | 1 986          | 1 344 (67.67%) | 1 148 (57.80%) | 763 (66.46%) | 838 (42.20%)   | 581 (69.33%) | 2.87%                     | -1.30 - 6.98   |
| <b>Mortality with Chronic Kidney Disease, and Chronic Neurological Disease</b>         |                |                |                |              |                |              |                           |                |
| 0 to 19                                                                                | 16 (0.89%)     | 5 (31.25%)     | 6 (0.57%)      | 3 (50.00%)   | 10 (1.33%)     | 2 (20.00%)   | -30.00%                   | -64.37 - 14.00 |
| 20 to 39                                                                               | 57 (3.16%)     | 24 (42.11%)    | 32 (3.04%)     | 4 (12.50%)   | 25 (3.32%)     | 20 (80.00%)  | 67.50%                    | 42.83 - 80.95  |
| 40 to 49                                                                               | 79 (4.37%)     | 36 (45.57%)    | 42 (3.98%)     | 18 (42.86%)  | 37 (4.92%)     | 18 (48.65%)  | 5.79%                     | -15.52 - 26.47 |
| 50 to 59                                                                               | 161 (8.91%)    | 78 (48.45%)    | 89 (8.44%)     | 42 (47.19%)  | 72 (9.57%)     | 36 (50.00%)  | 2.81%                     | -12.43 - 17.89 |
| 60 to 69                                                                               | 344 (19.05%)   | 209 (60.76%)   | 196 (18.60%)   | 122 (62.24%) | 148 (19.68%)   | 87 (58.78%)  | -3.46%                    | -13.80 - 6.85  |
| 70 to 79                                                                               | 486 (26.91%)   | 351 (72.22%)   | 288 (27.32%)   | 209 (72.57%) | 198 (26.33%)   | 142 (71.72%) | -0.85%                    | -9.06 - 7.10   |
| 80 +                                                                                   | 663 (36.71%)   | 514 (77.53%)   | 401 (38.05%)   | 313 (78.05%) | 262 (34.84%)   | 201 (76.72%) | -1.33%                    | -7.99 - 5.04   |
| Total                                                                                  | 1 806          | 1 217 (67.39%) | 1 054 (58.36%) | 711 (67.46%) | 752 (41.64%)   | 506 (67.29%) | -0.17%                    | -4.58 - 4.18   |
| <b>Mortality with Obesity, and Asthma</b>                                              |                |                |                |              |                |              |                           |                |
| 0 to 19                                                                                | 25 (0.84%)     | 3 (12.00%)     | 11 (0.91%)     | 2 (18.18%)   | 14 (0.79%)     | 1 (7.14%)    | -11.04%                   | -41.13 - 16.56 |
| 20 to 39                                                                               | 668 (22.50%)   | 195 (29.19%)   | 266 (22.07%)   | 63 (23.68%)  | 402 (22.79%)   | 132 (32.84%) | 9.16%                     | 2.13 - 15.83   |
| 40 to 49                                                                               | 644 (21.69%)   | 224 (34.78%)   | 266 (22.07%)   | 71 (26.69%)  | 378 (21.43%)   | 153 (40.48%) | 13.79%                    | 6.38 - 20.84   |
| 50 to 59                                                                               | 624 (21.02%)   | 222 (35.58%)   | 267 (22.16%)   | 75 (28.09%)  | 357 (20.24%)   | 147 (41.18%) | 13.09%                    | 5.54 - 20.32   |
| 60 to 69                                                                               | 534 (17.99%)   | 275 (51.50%)   | 217 (18.01%)   | 105 (48.39%) | 317 (17.97%)   | 170 (53.63%) | 5.24%                     | -3.37 - 13.75  |
| 70 to 79                                                                               | 311 (10.47%)   | 179 (57.56%)   | 118 (9.79%)    | 64 (54.24%)  | 193 (10.94%)   | 115 (59.59%) | 5.35%                     | -5.86 - 16.54  |
| 80 +                                                                                   | 163 (5.49%)    | 113 (69.33%)   | 60 (4.98%)     | 41 (68.33%)  | 103 (5.84%)    | 72 (69.90%)  | 1.57%                     | -12.45 - 16.47 |
| Total                                                                                  | 2 969          | 1 211 (40.79%) | 1 205 (40.59%) | 421 (34.94%) | 1 764 (59.41%) | 790 (44.78%) | 9.84%                     | 6.27 - 13.37   |
| <b>Mortality with Obesity, and Other Chronic Pneumatopathy</b>                         |                |                |                |              |                |              |                           |                |
| 0 to 19                                                                                | 4 (0.15%)      | 0 (0.00%)      | 2 (0.17%)      | 0 (0.00%)    | 2 (0.14%)      | 0 (0.00%)    | -                         | -              |
| 20 to 39                                                                               | 171 (6.52%)    | 62 (36.26%)    | 83 (7.18%)     | 29 (34.94%)  | 88 (6.00%)     | 33 (37.50%)  | 2.56%                     | -11.69 - 16.60 |
| 40 to 49                                                                               | 227 (8.65%)    | 93 (40.97%)    | 94 (8.13%)     | 40 (42.55%)  | 133 (9.07%)    | 53 (39.85%)  | -2.70%                    | -15.54 - 10.05 |
| 50 to 59                                                                               | 444 (16.93%)   | 202 (45.50%)   | 208 (17.99%)   | 83 (39.90%)  | 236 (16.09%)   | 119 (50.42%) | 10.52%                    | 1.24 - 19.52   |
| 60 to 69                                                                               | 734 (27.98%)   | 412 (56.13%)   | 307 (26.56%)   | 173 (56.35%) | 427 (29.11%)   | 239 (55.97%) | -0.38%                    | -7.59 - 6.88   |
| 70 to 79                                                                               | 649 (24.74%)   | 434 (66.87%)   | 287 (24.83%)   | 195 (67.94%) | 362 (24.68%)   | 239 (66.02%) | -1.92%                    | -9.10 - 5.39   |
| 80 +                                                                                   | 394 (15.02%)   | 282 (71.57%)   | 175 (15.14%)   | 123 (70.29%) | 219 (14.93%)   | 159 (72.60%) | 2.31%                     | -6.55 - 11.32  |
| Total                                                                                  | 2 623          | 1 485 (56.61%) | 1 156 (44.07%) | 643 (55.62%) | 1 467 (55.93%) | 842 (57.40%) | 1.78%                     | -2.04 - 5.59   |
| <b>Mortality with Obesity, and Chronic Kidney Disease</b>                              |                |                |                |              |                |              |                           |                |
| 0 to 19                                                                                | 5 (0.22%)      | 2 (40.00%)     | 4 (0.38%)      | 1 (25.00%)   | 1 (0.08%)      | 1 (100.00%)  | 75.00%                    | -16.19 - 95.44 |
| 20 to 39                                                                               | 138 (5.94%)    | 57 (41.30%)    | 63 (5.96%)     | 20 (31.75%)  | 75 (5.92%)     | 37 (49.33%)  | 17.58%                    | 1.12 - 32.61   |
| 40 to 49                                                                               | 244 (10.50%)   | 122 (50.00%)   | 109 (10.31%)   | 52 (47.71%)  | 135 (10.66%)   | 70 (51.85%)  | 4.14%                     | -8.36 - 16.46  |

Continued on next page

Table 20 – continued from previous page

| Age group                                                                  | Whole pandemic |                | First Wave     |                | Second wave    |                | Second wave vs first wave |                |
|----------------------------------------------------------------------------|----------------|----------------|----------------|----------------|----------------|----------------|---------------------------|----------------|
|                                                                            | Cases          | Deaths         | Cases          | Deaths         | Cases          | Deaths         | Difference                | 99.5% CI       |
| 50 to 59                                                                   | 447 (19.24%)   | 247 (55.26%)   | 196 (18.54%)   | 93 (47.45%)    | 251 (19.83%)   | 154 (61.35%)   | 13.90%                    | 4.61 - 22.91   |
| 60 to 69                                                                   | 658 (28.33%)   | 452 (68.69%)   | 304 (28.76%)   | 204 (67.11%)   | 354 (27.96%)   | 248 (70.06%)   | 2.95%                     | -4.12 - 10.05  |
| 70 to 79                                                                   | 534 (22.99%)   | 385 (72.10%)   | 263 (24.88%)   | 197 (74.90%)   | 271 (21.41%)   | 188 (69.37%)   | -5.53%                    | -13.04 - 2.08  |
| 80 +                                                                       | 297 (12.79%)   | 216 (72.73%)   | 118 (11.16%)   | 86 (72.88%)    | 179 (14.14%)   | 130 (72.63%)   | -0.25%                    | -10.27 - 10.27 |
| Total                                                                      | 2 323          | 1 481 (63.75%) | 1 057 (45.50%) | 653 (61.78%)   | 1 266 (54.50%) | 828 (65.40%)   | 3.62%                     | -0.30 - 7.55   |
| Mortality with Diabetes mellitus, and Chronic Liver Disease                |                |                |                |                |                |                |                           |                |
| 0 to 19                                                                    | 2 (0.10%)      | 0 (0.00%)      | 2 (0.18%)      | 0 (0.00%)      | 0 (0.00%)      | 0 (0%)         | -                         | -              |
| 20 to 39                                                                   | 56 (2.67%)     | 18 (32.14%)    | 28 (2.47%)     | 8 (28.57%)     | 28 (2.89%)     | 10 (35.71%)    | 7.14%                     | -16.67 - 29.90 |
| 40 to 49                                                                   | 162 (7.71%)    | 72 (44.44%)    | 86 (7.60%)     | 41 (47.67%)    | 76 (7.85%)     | 31 (40.79%)    | -6.88%                    | -21.57 - 8.31  |
| 50 to 59                                                                   | 473 (22.52%)   | 238 (50.32%)   | 254 (22.44%)   | 126 (49.61%)   | 219 (22.62%)   | 112 (51.14%)   | 1.53%                     | -7.45 - 10.48  |
| 60 to 69                                                                   | 675 (32.14%)   | 401 (59.41%)   | 351 (31.01%)   | 202 (57.55%)   | 324 (33.47%)   | 199 (61.42%)   | 3.87%                     | -3.53 - 11.20  |
| 70 to 79                                                                   | 488 (23.24%)   | 326 (66.80%)   | 263 (23.23%)   | 187 (71.10%)   | 225 (23.24%)   | 139 (61.78%)   | -9.32%                    | -17.61 - -0.94 |
| 80 +                                                                       | 244 (11.62%)   | 183 (75.00%)   | 148 (13.07%)   | 116 (78.38%)   | 96 (9.92%)     | 67 (69.79%)    | -8.59%                    | -20.01 - 2.45  |
| Total                                                                      | 2 100          | 1 238 (58.95%) | 1 132 (53.90%) | 680 (60.07%)   | 968 (46.10%)   | 558 (57.64%)   | -2.43%                    | -6.64 - 1.79   |
| Mortality with Diabetes mellitus, and Immunodeficiency or Immunodepression |                |                |                |                |                |                |                           |                |
| 0 to 19                                                                    | 5 (0.12%)      | 0 (0.00%)      | 5 (0.21%)      | 0 (0.00%)      | 0 (0.00%)      | 0 (0%)         | -                         | -              |
| 20 to 39                                                                   | 140 (3.33%)    | 55 (39.29%)    | 90 (3.79%)     | 32 (35.56%)    | 50 (2.74%)     | 23 (46.00%)    | 10.44%                    | -6.16 - 26.82  |
| 40 to 49                                                                   | 353 (8.41%)    | 149 (42.21%)   | 200 (8.42%)    | 78 (39.00%)    | 153 (8.39%)    | 71 (46.41%)    | 7.41%                     | -2.95 - 17.63  |
| 50 to 59                                                                   | 825 (19.65%)   | 363 (44.00%)   | 492 (20.71%)   | 212 (43.09%)   | 333 (18.27%)   | 151 (45.35%)   | 2.26%                     | -4.61 - 9.14   |
| 60 to 69                                                                   | 1 270 (30.25%) | 687 (54.09%)   | 685 (28.83%)   | 366 (53.43%)   | 585 (32.09%)   | 321 (54.87%)   | 1.44%                     | -4.05 - 6.91   |
| 70 to 79                                                                   | 1 050 (25.01%) | 662 (63.05%)   | 601 (25.29%)   | 386 (64.23%)   | 449 (24.63%)   | 276 (61.47%)   | -2.76%                    | -8.66 - 3.12   |
| 80 +                                                                       | 556 (13.24%)   | 399 (71.76%)   | 303 (12.75%)   | 216 (71.29%)   | 253 (13.88%)   | 183 (72.33%)   | 1.04%                     | -6.50 - 8.46   |
| Total                                                                      | 4 199          | 2 315 (55.13%) | 2 376 (56.58%) | 1 290 (54.29%) | 1 823 (43.42%) | 1 025 (56.23%) | 1.94%                     | -1.10 - 4.96   |
| Mortality with Diabetes mellitus, and Asthma                               |                |                |                |                |                |                |                           |                |
| 0 to 19                                                                    | 11 (0.24%)     | 1 (9.09%)      | 7 (0.31%)      | 1 (14.29%)     | 4 (0.18%)      | 0 (0.00%)      | -14.29%                   | -51.31 - 36.09 |
| 20 to 39                                                                   | 251 (5.58%)    | 72 (28.69%)    | 133 (5.84%)    | 33 (24.81%)    | 118 (5.31%)    | 39 (33.05%)    | 8.24%                     | -2.94 - 19.30  |
| 40 to 49                                                                   | 505 (11.22%)   | 155 (30.69%)   | 259 (11.38%)   | 71 (27.41%)    | 246 (11.06%)   | 84 (34.15%)    | 6.74%                     | -1.31 - 14.69  |
| 50 to 59                                                                   | 910 (20.22%)   | 314 (34.51%)   | 472 (20.74%)   | 143 (30.30%)   | 438 (19.69%)   | 171 (39.04%)   | 8.74%                     | 2.56 - 14.86   |
| 60 to 69                                                                   | 1 256 (27.91%) | 562 (44.75%)   | 609 (26.76%)   | 246 (40.39%)   | 647 (29.09%)   | 316 (48.84%)   | 8.45%                     | 2.95 - 13.87   |
| 70 to 79                                                                   | 993 (22.07%)   | 508 (51.16%)   | 483 (21.22%)   | 242 (50.10%)   | 510 (22.93%)   | 266 (52.16%)   | 2.06%                     | -4.15 - 8.24   |
| 80 +                                                                       | 574 (12.76%)   | 365 (63.59%)   | 313 (13.75%)   | 206 (65.81%)   | 261 (11.74%)   | 159 (60.92%)   | -4.89%                    | -12.76 - 2.98  |
| Total                                                                      | 4 500          | 1 977 (43.93%) | 2 276 (50.58%) | 942 (41.39%)   | 2 224 (49.42%) | 1 035 (46.54%) | 5.15%                     | 2.25 - 8.04    |
| Mortality with Diabetes mellitus, and Other Chronic Pneumatopathy          |                |                |                |                |                |                |                           |                |
| 0 to 19                                                                    | 3 (0.04%)      | 1 (33.33%)     | 3 (0.07%)      | 1 (33.33%)     | 0 (0.00%)      | 0 (0%)         | -                         | -              |
| 20 to 39                                                                   | 97 (1.28%)     | 41 (42.27%)    | 53 (1.28%)     | 20 (37.74%)    | 44 (1.27%)     | 21 (47.73%)    | 9.99%                     | -9.41 - 28.56  |
| 40 to 49                                                                   | 235 (3.09%)    | 91 (38.72%)    | 124 (2.99%)    | 47 (37.90%)    | 111 (3.22%)    | 44 (39.64%)    | 1.74%                     | -10.56 - 14.04 |
| 50 to 59                                                                   | 804 (10.58%)   | 368 (45.77%)   | 467 (11.27%)   | 203 (43.47%)   | 337 (9.76%)    | 165 (48.96%)   | 5.49%                     | -1.48 - 12.41  |
| 60 to 69                                                                   | 2 100 (27.64%) | 1 196 (56.95%) | 1 118 (26.97%) | 640 (57.25%)   | 982 (28.45%)   | 556 (56.62%)   | -0.63%                    | -4.87 - 3.61   |
| 70 to 79                                                                   | 2 527 (33.26%) | 1 608 (63.63%) | 1 364 (32.91%) | 863 (63.27%)   | 1 163 (33.69%) | 745 (64.06%)   | 0.79%                     | -2.98 - 4.54   |
| 80 +                                                                       | 1 831 (24.10%) | 1 285 (70.18%) | 1 016 (24.51%) | 703 (69.19%)   | 815 (23.61%)   | 582 (71.41%)   | 2.22%                     | -2.01 - 6.39   |
| Total                                                                      | 7 597          | 4 590 (60.42%) | 4 145 (54.56%) | 2 477 (59.76%) | 3 452 (45.44%) | 2 113 (61.21%) | 1.45%                     | -0.76 - 3.66   |
| Mortality with Diabetes mellitus, and Chronic Neurological Disease         |                |                |                |                |                |                |                           |                |
| 0 to 19                                                                    | 9 (0.12%)      | 2 (22.22%)     | 6 (0.14%)      | 0 (0.00%)      | 3 (0.09%)      | 2 (66.67%)     | 66.67%                    | 6.41 - 93.85   |
| 20 to 39                                                                   | 118 (1.55%)    | 43 (36.44%)    | 56 (1.33%)     | 16 (28.57%)    | 62 (1.83%)     | 27 (43.55%)    | 14.98%                    | -2.38 - 30.97  |
| 40 to 49                                                                   | 218 (2.87%)    | 92 (42.20%)    | 122 (2.89%)    | 45 (36.89%)    | 96 (2.83%)     | 47 (48.96%)    | 12.07%                    | -1.10 - 24.78  |
| 50 to 59                                                                   | 618 (8.13%)    | 286 (46.28%)   | 340 (8.07%)    | 144 (42.35%)   | 278 (8.20%)    | 142 (51.08%)   | 8.73%                     | 0.83 - 16.49   |
| 60 to 69                                                                   | 1 327 (17.45%) | 737 (55.54%)   | 698 (16.56%)   | 380 (54.44%)   | 629 (18.55%)   | 357 (56.76%)   | 2.32%                     | -3.03 - 7.64   |
| 70 to 79                                                                   | 2 354 (30.95%) | 1 498 (63.64%) | 1 305 (30.96%) | 791 (60.61%)   | 1 049 (30.93%) | 707 (67.40%)   | 6.79%                     | 2.88 - 10.64   |
| 80 +                                                                       | 2 962 (38.94%) | 2 091 (70.59%) | 1 688 (40.05%) | 1 191 (70.56%) | 1 274 (37.57%) | 900 (70.64%)   | 0.08%                     | -3.24 - 3.38   |
| Total                                                                      | 7 606          | 4 749 (62.44%) | 4 215 (55.42%) | 2 567 (60.90%) | 3 391 (44.58%) | 2 182 (64.35%) | 3.45%                     | 1.26 - 5.62    |
| Mortality with Diabetes mellitus, and Chronic Kidney Disease               |                |                |                |                |                |                |                           |                |
| 0 to 19                                                                    | 5 (0.04%)      | 3 (60.00%)     | 3 (0.04%)      | 2 (66.67%)     | 2 (0.04%)      | 1 (50.00%)     | -16.67%                   | -65.48 - 44.58 |
| 20 to 39                                                                   | 327 (2.71%)    | 143 (43.73%)   | 194 (2.83%)    | 70 (36.08%)    | 133 (2.55%)    | 73 (54.89%)    | 18.81%                    | 7.83 - 29.22   |
| 40 to 49                                                                   | 753 (6.24%)    | 376 (49.93%)   | 446 (6.51%)    | 205 (45.96%)   | 307 (5.88%)    | 171 (55.70%)   | 9.74%                     | 2.47 - 16.85   |
| 50 to 59                                                                   | 1 972 (16.33%) | 1 088 (55.17%) | 1 147 (16.74%) | 597 (52.05%)   | 825 (15.80%)   | 491 (59.52%)   | 7.47%                     | 3.02 - 11.85   |
| 60 to 69                                                                   | 3 563 (29.51%) | 2 210 (62.03%) | 2 000 (29.19%) | 1 227 (61.35%) | 1 563 (29.93%) | 983 (62.89%)   | 1.54%                     | -1.67 - 4.74   |
| 70 to 79                                                                   | 3 436 (28.46%) | 2 340 (68.10%) | 1 900 (27.73%) | 1 283 (67.53%) | 1 536 (29.41%) | 1 057 (68.82%) | 1.29%                     | -1.85 - 4.41   |
| 80 +                                                                       | 2 018 (16.71%) | 1 492 (73.93%) | 1 162 (16.96%) | 846 (72.81%)   | 856 (16.39%)   | 646 (75.47%)   | 2.66%                     | -1.22 - 6.48   |
| Total                                                                      | 12 074         | 7 652 (63.38%) | 6 852 (56.75%) | 4 230 (61.73%) | 5 222 (43.25%) | 3 422 (65.53%) | 3.80%                     | 2.06 - 5.52    |
| Mortality with Diabetes mellitus, and Obesity                              |                |                |                |                |                |                |                           |                |
| 0 to 19                                                                    | 15 (0.08%)     | 8 (53.33%)     | 8 (0.11%)      | 4 (50.00%)     | 7 (0.06%)      | 4 (57.14%)     | 7.14%                     | -35.77 - 46.41 |
| 20 to 39                                                                   | 1 322 (7.19%)  | 469 (35.48%)   | 559 (7.71%)    | 183 (32.74%)   | 763 (6.86%)    | 286 (37.48%)   | 4.74%                     | -0.48 - 9.88   |
| 40 to 49                                                                   | 2 622 (14.26%) | 1 041 (39.70%) | 1 073 (14.79%) | 358 (33.36%)   | 1 549 (13.92%) | 683 (44.09%)   | 10.73%                    | 6.95 - 14.44   |
| 50 to 59                                                                   | 4 329 (23.55%) | 1 911 (44.14%) | 1 708 (23.54%) | 658 (38.52%)   | 2 621 (23.56%) | 1 253 (47.81%) | 9.29%                     | 6.27 - 12.26   |
| 60 to 69                                                                   | 5 481 (29.82%) | 3 030 (55.28%) | 2 060 (28.39%) | 1 042 (50.58%) | 3 421 (30.75%) | 1 988 (58.11%) | 7.53%                     | 4.81 - 10.24   |
| 70 to 79                                                                   | 3 394 (18.46%) | 2 137 (62.96%) | 1 354 (18.66%) | 818 (60.41%)   | 2 040 (18.33%) | 1 319 (64.66%) | 4.25%                     | 0.92 - 7.58    |

Continued on next page

Table 20 – continued from previous page

| Age group                                                                               | Whole pandemic |                | First Wave     |                | Second wave     |                | Second wave vs first wave |                |
|-----------------------------------------------------------------------------------------|----------------|----------------|----------------|----------------|-----------------|----------------|---------------------------|----------------|
|                                                                                         | Cases          | Deaths         | Cases          | Deaths         | Cases           | Deaths         | Difference                | 99.5% CI       |
| 80 +                                                                                    | 1 219 (6.63%)  | 840 (68.91%)   | 493 (6.80%)    | 334 (67.75%)   | 726 (6.52%)     | 506 (69.70%)   | 1.95%                     | -3.31 - 7.29   |
| Total                                                                                   | 18 382         | 9 436 (51.33%) | 7 255 (39.47%) | 3 397 (46.82%) | 11 127 (60.53%) | 6 039 (54.27%) | 7.45%                     | 5.97 - 8.92    |
| Mortality with Chronic Cardiovascular Disease, and Chronic Hematological Disease        |                |                |                |                |                 |                |                           |                |
| 0 to 19                                                                                 | 4 (0.19%)      | 2 (50.00%)     | 4 (0.35%)      | 2 (50.00%)     | 0 (0.00%)       | 0 (0%)         | -                         | -              |
| 20 to 39                                                                                | 76 (3.65%)     | 20 (26.32%)    | 49 (4.25%)     | 14 (28.57%)    | 27 (2.91%)      | 6 (22.22%)     | -6.35%                    | -24.42 - 15.06 |
| 40 to 49                                                                                | 124 (5.96%)    | 49 (39.52%)    | 68 (5.90%)     | 23 (33.82%)    | 56 (6.04%)      | 26 (46.43%)    | 12.61%                    | -4.55 - 28.97  |
| 50 to 59                                                                                | 299 (14.37%)   | 113 (37.79%)   | 146 (12.66%)   | 49 (33.56%)    | 153 (16.50%)    | 64 (41.83%)    | 8.27%                     | -2.71 - 18.94  |
| 60 to 69                                                                                | 545 (26.20%)   | 297 (54.50%)   | 279 (24.20%)   | 153 (54.84%)   | 266 (28.69%)    | 144 (54.14%)   | -0.70%                    | -9.01 - 7.61   |
| 70 to 79                                                                                | 561 (26.47%)   | 326 (58.11%)   | 335 (29.05%)   | 175 (52.24%)   | 226 (24.38%)    | 151 (66.81%)   | 14.57%                    | 6.29 - 22.47   |
| 80 +                                                                                    | 471 (22.64%)   | 327 (69.43%)   | 272 (23.59%)   | 186 (68.38%)   | 199 (21.47%)    | 141 (70.85%)   | 2.47%                     | -6.00 - 10.69  |
| Total                                                                                   | 2 080          | 1 134 (54.52%) | 1 153 (55.43%) | 602 (52.21%)   | 927 (44.57%)    | 532 (57.39%)   | 5.18%                     | 0.87 - 9.45    |
| Mortality with Chronic Cardiovascular Disease, and Chronic Liver Disease                |                |                |                |                |                 |                |                           |                |
| 0 to 19                                                                                 | 6 (0.23%)      | 4 (66.67%)     | 3 (0.22%)      | 1 (33.33%)     | 3 (0.25%)       | 3 (100.00%)    | 66.67%                    | -5.86 - 93.85  |
| 20 to 39                                                                                | 66 (2.57%)     | 17 (25.76%)    | 39 (2.89%)     | 8 (20.51%)     | 27 (2.22%)      | 9 (33.33%)     | 12.82%                    | -8.19 - 34.03  |
| 40 to 49                                                                                | 198 (7.71%)    | 87 (43.94%)    | 102 (7.55%)    | 47 (46.08%)    | 96 (7.89%)      | 40 (41.67%)    | -4.41%                    | -17.84 - 9.28  |
| 50 to 59                                                                                | 499 (19.43%)   | 248 (49.70%)   | 263 (19.47%)   | 122 (46.39%)   | 236 (19.39%)    | 126 (53.39%)   | 7.00%                     | -1.77 - 15.63  |
| 60 to 69                                                                                | 763 (29.71%)   | 428 (56.09%)   | 362 (26.79%)   | 196 (54.14%)   | 401 (32.95%)    | 232 (57.86%)   | 3.72%                     | -3.32 - 10.71  |
| 70 to 79                                                                                | 653 (25.43%)   | 422 (64.62%)   | 355 (26.28%)   | 238 (67.04%)   | 298 (24.49%)    | 184 (61.74%)   | -5.30%                    | -12.62 - 2.05  |
| 80 +                                                                                    | 383 (14.91%)   | 283 (73.89%)   | 227 (16.80%)   | 175 (77.09%)   | 156 (12.82%)    | 108 (69.23%)   | -7.86%                    | -16.98 - 1.07  |
| Total                                                                                   | 2 568          | 1 489 (57.98%) | 1 351 (52.61%) | 787 (58.25%)   | 1 217 (47.39%)  | 702 (57.68%)   | -0.57%                    | -4.39 - 3.25   |
| Mortality with Chronic Cardiovascular Disease, and Immunodeficiency or Immunodepression |                |                |                |                |                 |                |                           |                |
| 0 to 19                                                                                 | 20 (0.33%)     | 7 (35.00%)     | 15 (0.47%)     | 6 (40.00%)     | 5 (0.18%)       | 1 (20.00%)     | -20.00%                   | -49.27 - 27.00 |
| 20 to 39                                                                                | 213 (3.55%)    | 79 (37.09%)    | 122 (3.78%)    | 48 (39.34%)    | 91 (3.28%)      | 31 (34.07%)    | -5.27%                    | -17.85 - 7.82  |
| 40 to 49                                                                                | 461 (7.69%)    | 178 (38.61%)   | 241 (7.48%)    | 93 (38.59%)    | 220 (7.94%)     | 85 (38.64%)    | 0.05%                     | -8.77 - 8.90   |
| 50 to 59                                                                                | 1 057 (17.63%) | 446 (42.19%)   | 583 (18.08%)   | 240 (41.17%)   | 474 (17.10%)    | 206 (43.46%)   | 2.29%                     | -3.67 - 8.26   |
| 60 to 69                                                                                | 1 658 (27.65%) | 893 (53.86%)   | 876 (27.17%)   | 467 (53.31%)   | 782 (28.21%)    | 426 (54.48%)   | 1.17%                     | -3.64 - 5.95   |
| 70 to 79                                                                                | 1 479 (24.67%) | 933 (63.08%)   | 788 (24.44%)   | 499 (63.32%)   | 691 (24.93%)    | 434 (62.81%)   | -0.51%                    | -5.44 - 4.39   |
| 80 +                                                                                    | 1 108 (18.48%) | 811 (73.19%)   | 599 (18.58%)   | 426 (71.12%)   | 509 (18.36%)    | 385 (75.64%)   | 4.52%                     | -0.72 - 9.67   |
| Total                                                                                   | 5 996          | 3 347 (55.82%) | 3 224 (53.77%) | 1 779 (55.18%) | 2 772 (46.23%)  | 1 568 (56.57%) | 1.39%                     | -1.14 - 3.90   |
| Mortality with Chronic Cardiovascular Disease, and Asthma                               |                |                |                |                |                 |                |                           |                |
| 0 to 19                                                                                 | 21 (0.30%)     | 4 (19.05%)     | 11 (0.32%)     | 1 (9.09%)      | 10 (0.29%)      | 3 (30.00%)     | 20.91%                    | -13.59 - 52.14 |
| 20 to 39                                                                                | 328 (4.72%)    | 89 (27.13%)    | 171 (4.94%)    | 44 (25.73%)    | 157 (4.49%)     | 45 (28.66%)    | 2.93%                     | -6.64 - 12.53  |
| 40 to 49                                                                                | 790 (11.36%)   | 211 (26.71%)   | 394 (11.39%)   | 86 (21.83%)    | 396 (11.33%)    | 125 (31.57%)   | 9.74%                     | 3.57 - 15.81   |
| 50 to 59                                                                                | 1 293 (18.59%) | 384 (29.70%)   | 632 (18.27%)   | 158 (25.00%)   | 661 (18.91%)    | 226 (34.19%)   | 9.19%                     | 4.22 - 14.09   |
| 60 to 69                                                                                | 1 736 (24.96%) | 711 (40.96%)   | 839 (24.26%)   | 315 (37.54%)   | 897 (25.66%)    | 396 (44.15%)   | 6.61%                     | 1.97 - 11.19   |
| 70 to 79                                                                                | 1 582 (22.75%) | 798 (50.44%)   | 758 (21.91%)   | 374 (49.34%)   | 824 (23.57%)    | 424 (51.46%)   | 2.12%                     | -2.81 - 7.03   |
| 80 +                                                                                    | 1 205 (17.33%) | 732 (60.75%)   | 654 (18.91%)   | 383 (58.56%)   | 551 (15.76%)    | 349 (63.34%)   | 4.78%                     | -0.76 - 10.25  |
| Total                                                                                   | 6 955          | 2 929 (42.11%) | 3 459 (49.73%) | 1 361 (39.35%) | 3 496 (50.27%)  | 1 568 (44.85%) | 5.50%                     | 3.18 - 7.82    |
| Mortality with Chronic Cardiovascular Disease, and Other Chronic Pneumatopathy          |                |                |                |                |                 |                |                           |                |
| 0 to 19                                                                                 | 23 (0.17%)     | 7 (30.43%)     | 14 (0.19%)     | 5 (35.71%)     | 9 (0.14%)       | 2 (22.22%)     | -13.49%                   | -43.56 - 24.36 |
| 20 to 39                                                                                | 138 (1.01%)    | 52 (37.68%)    | 67 (0.92%)     | 24 (35.82%)    | 71 (1.11%)      | 28 (39.44%)    | 3.62%                     | -12.33 - 19.23 |
| 40 to 49                                                                                | 354 (2.60%)    | 132 (37.29%)   | 184 (2.54%)    | 52 (28.26%)    | 170 (2.67%)     | 80 (47.06%)    | 18.80%                    | 8.71 - 28.40   |
| 50 to 59                                                                                | 1 194 (8.76%)  | 509 (42.63%)   | 684 (9.44%)    | 280 (40.94%)   | 510 (8.00%)     | 229 (44.90%)   | 3.96%                     | -1.70 - 9.62   |
| 60 to 69                                                                                | 3 243 (23.80%) | 1 730 (53.35%) | 1 663 (22.95%) | 887 (53.34%)   | 1 580 (24.77%)  | 843 (53.35%)   | 0.01%                     | -3.41 - 3.45   |
| 70 to 79                                                                                | 4 477 (32.86%) | 2 750 (61.43%) | 2 337 (32.25%) | 1 424 (60.93%) | 2 140 (33.55%)  | 1 326 (61.96%) | 1.03%                     | -1.82 - 3.88   |
| 80 +                                                                                    | 4 196 (30.80%) | 2 910 (69.35%) | 2 298 (31.71%) | 1 563 (68.02%) | 1 898 (29.76%)  | 1 347 (70.97%) | 2.95%                     | 0.15 - 5.74    |
| Total                                                                                   | 13 625         | 8 090 (59.38%) | 7 247 (53.19%) | 4 235 (58.44%) | 6 378 (46.81%)  | 3 855 (60.44%) | 2.00%                     | 0.35 - 3.65    |
| Mortality with Chronic Cardiovascular Disease, and Chronic Neurological Disease         |                |                |                |                |                 |                |                           |                |
| 0 to 19                                                                                 | 34 (0.25%)     | 9 (26.47%)     | 21 (0.28%)     | 5 (23.81%)     | 13 (0.22%)      | 4 (30.77%)     | 6.96%                     | -20.97 - 36.88 |
| 20 to 39                                                                                | 159 (1.19%)    | 60 (37.74%)    | 84 (1.13%)     | 28 (33.33%)    | 75 (1.27%)      | 32 (42.67%)    | 9.34%                     | -5.64 - 23.86  |
| 40 to 49                                                                                | 329 (2.46%)    | 119 (36.17%)   | 169 (2.26%)    | 53 (31.36%)    | 160 (2.72%)     | 66 (41.25%)    | 9.89%                     | -0.49 - 20.01  |
| 50 to 59                                                                                | 885 (6.63%)    | 391 (44.18%)   | 469 (6.28%)    | 200 (42.64%)   | 416 (7.07%)     | 191 (45.91%)   | 3.27%                     | -3.27 - 9.78   |
| 60 to 69                                                                                | 2 077 (15.56%) | 1 139 (54.84%) | 1 115 (14.94%) | 599 (53.72%)   | 962 (16.35%)    | 540 (56.13%)   | 2.41%                     | -1.88 - 6.68   |
| 70 to 79                                                                                | 3 749 (28.09%) | 2 329 (62.12%) | 2 077 (27.83%) | 1 266 (60.95%) | 1 672 (28.42%)  | 1 063 (63.58%) | 2.63%                     | -0.50 - 5.73   |
| 80 +                                                                                    | 6 115 (45.81%) | 4 224 (69.08%) | 3 529 (47.28%) | 2 429 (68.83%) | 2 586 (43.95%)  | 1 795 (69.41%) | 0.58%                     | -1.77 - 2.92   |
| Total                                                                                   | 13 348         | 8 271 (61.96%) | 7 464 (55.92%) | 4 580 (61.36%) | 5 884 (44.08%)  | 3 691 (62.73%) | 1.37%                     | -0.29 - 3.02   |
| Mortality with Chronic Cardiovascular Disease, and Chronic Kidney Disease               |                |                |                |                |                 |                |                           |                |
| 0 to 19                                                                                 | 23 (0.14%)     | 12 (52.17%)    | 15 (0.17%)     | 7 (46.67%)     | 8 (0.11%)       | 5 (62.50%)     | 15.83%                    | -23.64 - 48.16 |
| 20 to 39                                                                                | 476 (2.99%)    | 159 (33.40%)   | 274 (3.07%)    | 84 (30.66%)    | 202 (2.88%)     | 75 (37.13%)    | 6.47%                     | -2.47 - 15.04  |
| 40 to 49                                                                                | 991 (6.22%)    | 456 (46.01%)   | 564 (6.33%)    | 244 (43.26%)   | 427 (6.09%)     | 212 (49.65%)   | 6.39%                     | 0.12 - 12.60   |
| 50 to 59                                                                                | 2 271 (14.26%) | 1 189 (52.36%) | 1 279 (14.35%) | 630 (49.26%)   | 992 (14.16%)    | 559 (56.35%)   | 7.09%                     | 2.95 - 11.19   |
| 60 to 69                                                                                | 4 063 (25.52%) | 2 429 (59.78%) | 2 254 (25.29%) | 1 339 (59.41%) | 1 809 (25.81%)  | 1 090 (60.25%) | 0.84%                     | -2.19 - 3.87   |
| 70 to 79                                                                                | 4 468 (28.06%) | 2 992 (66.97%) | 2 458 (27.58%) | 1 621 (65.95%) | 2 010 (28.68%)  | 1 371 (68.21%) | 2.26%                     | -0.51 - 5.02   |
| 80 +                                                                                    | 3 629 (22.79%) | 2 654 (73.13%) | 2 069 (23.21%) | 1 494 (72.21%) | 1 560 (22.26%)  | 1 160 (74.36%) | 2.15%                     | -0.77 - 5.03   |
| Total                                                                                   | 15 921         | 9 891 (62.13%) | 8 913 (55.98%) | 5 419 (60.80%) | 7 008 (44.02%)  | 4 472 (63.81%) | 3.01%                     | 1.50 - 4.53    |

Continued on next page

Table 20 – continued from previous page

| Age group                                                                                                  | Whole pandemic  |                 | First Wave      |                 | Second wave     |                 | Second wave vs first wave |                 |
|------------------------------------------------------------------------------------------------------------|-----------------|-----------------|-----------------|-----------------|-----------------|-----------------|---------------------------|-----------------|
|                                                                                                            | Cases           | Deaths          | Cases           | Deaths          | Cases           | Deaths          | Difference                | 99.5% CI        |
| Mortality with Chronic Cardiovascular Disease, and Obesity                                                 |                 |                 |                 |                 |                 |                 |                           |                 |
| 0 to 19                                                                                                    | 18 (0.07%)      | 7 (38.89%)      | 6 (0.06%)       | 2 (33.33%)      | 12 (0.08%)      | 5 (41.67%)      | 8.34%                     | -34.60 - 43.77  |
| 20 to 39                                                                                                   | 1 947 (7.74%)   | 607 (31.18%)    | 781 (8.07%)     | 202 (25.86%)    | 1 166 (7.53%)   | 405 (34.73%)    | 8.87%                     | 4.71 - 12.92    |
| 40 to 49                                                                                                   | 3 840 (15.26%)  | 1 400 (36.46%)  | 1 479 (15.28%)  | 447 (30.22%)    | 2 361 (15.24%)  | 953 (40.36%)    | 10.14%                    | 7.05 - 13.17    |
| 50 to 59                                                                                                   | 6 026 (23.94%)  | 2 509 (41.64%)  | 2 261 (23.36%)  | 793 (35.07%)    | 3 765 (24.31%)  | 1 716 (45.58%)  | 10.51%                    | 7.96 - 13.02    |
| 60 to 69                                                                                                   | 6 996 (27.79%)  | 3 677 (52.56%)  | 2 609 (26.95%)  | 1 229 (47.11%)  | 4 387 (28.32%)  | 2 448 (55.80%)  | 8.69%                     | 6.28 - 11.10    |
| 70 to 79                                                                                                   | 4 430 (17.60%)  | 2 722 (61.44%)  | 1 747 (18.05%)  | 1 026 (58.73%)  | 2 683 (17.32%)  | 1 696 (63.21%)  | 4.48%                     | 1.55 - 7.43     |
| 80 +                                                                                                       | 1 914 (7.60%)   | 1 305 (68.18%)  | 798 (8.24%)     | 543 (68.05%)    | 1 116 (7.20%)   | 762 (68.28%)    | 0.23%                     | -3.97 - 4.49    |
| Total                                                                                                      | 25 171          | 12 227 (48.58%) | 9 681 (38.46%)  | 4 242 (43.82%)  | 15 490 (61.54%) | 7 985 (51.55%)  | 7.73%                     | 6.47 - 8.99     |
| Mortality with Chronic Cardiovascular Disease, and Diabetes mellitus                                       |                 |                 |                 |                 |                 |                 |                           |                 |
| 0 to 19                                                                                                    | 35 (0.03%)      | 6 (17.14%)      | 24 (0.05%)      | 5 (20.83%)      | 11 (0.02%)      | 1 (9.09%)       | -11.74%                   | -32.75 - 19.16  |
| 20 to 39                                                                                                   | 1 855 (1.85%)   | 547 (29.49%)    | 986 (1.98%)     | 265 (26.88%)    | 869 (1.72%)     | 282 (32.45%)    | 5.57%                     | 1.41 - 9.73     |
| 40 to 49                                                                                                   | 6 317 (6.29%)   | 2 079 (32.91%)  | 3 228 (6.48%)   | 965 (29.89%)    | 3 089 (6.10%)   | 1 114 (36.06%)  | 6.17%                     | 3.85 - 8.48     |
| 50 to 59                                                                                                   | 16 703 (16.63%) | 6 159 (36.87%)  | 8 305 (16.66%)  | 2 748 (33.09%)  | 8 398 (16.59%)  | 3 411 (40.62%)  | 7.53%                     | 6.07 - 8.98     |
| 60 to 69                                                                                                   | 30 063 (29.92%) | 14 181 (47.17%) | 14 364 (28.82%) | 6 338 (44.12%)  | 15 699 (31.01%) | 7 843 (49.96%)  | 5.84%                     | 4.71 - 6.96     |
| 70 to 79                                                                                                   | 28 221 (28.09%) | 15 702 (55.64%) | 13 794 (27.68%) | 7 384 (53.53%)  | 14 427 (28.50%) | 8 318 (57.66%)  | 4.13%                     | 2.97 - 5.28     |
| 80 +                                                                                                       | 17 268 (17.19%) | 11 109 (64.33%) | 9 135 (18.33%)  | 5 807 (63.57%)  | 8 133 (16.06%)  | 5 302 (65.19%)  | 1.62%                     | 0.19 - 3.05     |
| Total                                                                                                      | 100 462         | 49 783 (49.55%) | 49 836 (49.61%) | 23 512 (47.18%) | 50 626 (50.39%) | 26 271 (51.89%) | 4.71%                     | 4.10 - 5.33     |
| Mortality with Chronic Cardiovascular Disease, Diabetes mellitus, and Immunodeficiency or Immunodepression |                 |                 |                 |                 |                 |                 |                           |                 |
| 0 to 19                                                                                                    | 0 (0.00%)       | 0 (0%)          | 0 (0.00%)       | 0 (0%)          | 0 (0.00%)       | 0 (0%)          | -                         | -               |
| 20 to 39                                                                                                   | 50 (2.05%)      | 24 (48.00%)     | 33 (2.47%)      | 16 (48.48%)     | 17 (1.54%)      | 8 (47.06%)      | -1.42%                    | -27.92 - 25.75  |
| 40 to 49                                                                                                   | 166 (6.80%)     | 70 (42.17%)     | 92 (6.89%)      | 38 (41.30%)     | 74 (6.68%)      | 32 (43.24%)     | 1.94%                     | -12.84 - 16.75  |
| 50 to 59                                                                                                   | 449 (18.39%)    | 196 (43.65%)    | 256 (19.18%)    | 105 (41.02%)    | 193 (17.43%)    | 91 (47.15%)     | 6.13%                     | -3.10 - 15.28   |
| 60 to 69                                                                                                   | 738 (30.22%)    | 397 (53.79%)    | 390 (29.21%)    | 211 (54.10%)    | 348 (31.44%)    | 186 (53.45%)    | -0.65%                    | -7.82 - 6.51    |
| 70 to 79                                                                                                   | 659 (26.99%)    | 430 (65.25%)    | 357 (26.74%)    | 236 (66.11%)    | 302 (27.28%)    | 194 (64.24%)    | -1.87%                    | -9.15 - 5.38    |
| 80 +                                                                                                       | 380 (15.56%)    | 284 (74.74%)    | 207 (15.51%)    | 150 (72.46%)    | 173 (15.63%)    | 134 (77.46%)    | 5.00%                     | -3.83 - 13.53   |
| Total                                                                                                      | 2 442           | 1 401 (57.37%)  | 1 335 (54.67%)  | 756 (56.63%)    | 1 107 (45.33%)  | 645 (58.27%)    | 1.64%                     | -2.30 - 5.56    |
| Mortality with Chronic Cardiovascular Disease, Diabetes mellitus, and Asthma                               |                 |                 |                 |                 |                 |                 |                           |                 |
| 0 to 19                                                                                                    | 1 (0.04%)       | 0 (0.00%)       | 0 (0.00%)       | 0 (0%)          | 1 (0.07%)       | 0 (0.00%)       | -                         | -               |
| 20 to 39                                                                                                   | 84 (3.01%)      | 30 (35.71%)     | 45 (3.17%)      | 18 (40.00%)     | 39 (2.85%)      | 12 (30.77%)     | -9.23%                    | -28.22 - 11.10  |
| 40 to 49                                                                                                   | 255 (9.14%)     | 81 (31.76%)     | 129 (9.08%)     | 40 (31.01%)     | 126 (9.20%)     | 41 (32.54%)     | 1.53%                     | -9.79 - 12.83   |
| 50 to 59                                                                                                   | 540 (19.36%)    | 197 (36.48%)    | 273 (19.23%)    | 82 (30.04%)     | 267 (19.50%)    | 115 (43.07%)    | 13.03%                    | 4.91 - 20.93    |
| 60 to 69                                                                                                   | 815 (29.22%)    | 368 (45.15%)    | 407 (28.66%)    | 170 (41.77%)    | 408 (29.80%)    | 198 (48.53%)    | 6.76%                     | -0.07 - 13.50   |
| 70 to 79                                                                                                   | 682 (24.45%)    | 356 (52.20%)    | 335 (23.59%)    | 174 (51.94%)    | 347 (25.35%)    | 182 (52.45%)    | 0.51%                     | -6.95 - 7.96    |
| 80 +                                                                                                       | 412 (14.77%)    | 268 (65.05%)    | 231 (16.27%)    | 149 (64.50%)    | 181 (13.22%)    | 119 (65.75%)    | 1.25%                     | -8.04 - 10.35   |
| Total                                                                                                      | 2 789           | 1 300 (46.61%)  | 1 420 (50.91%)  | 633 (44.58%)    | 1 369 (49.09%)  | 667 (48.72%)    | 4.14%                     | 0.44 - 7.83     |
| Mortality with Chronic Cardiovascular Disease, Diabetes mellitus, and Other Chronic Pneumatopathy          |                 |                 |                 |                 |                 |                 |                           |                 |
| 0 to 19                                                                                                    | 1 (0.02%)       | 1 (100.00%)     | 1 (0.03%)       | 1 (100.00%)     | 0 (0.00%)       | 0 (0%)          | -                         | -               |
| 20 to 39                                                                                                   | 42 (0.77%)      | 17 (40.48%)     | 19 (0.64%)      | 7 (36.84%)      | 23 (0.92%)      | 10 (43.48%)     | 6.64%                     | -21.78 - 33.12  |
| 40 to 49                                                                                                   | 131 (2.39%)     | 56 (42.75%)     | 66 (2.22%)      | 25 (37.88%)     | 65 (2.59%)      | 31 (47.69%)     | 9.81%                     | -6.97 - 25.86   |
| 50 to 59                                                                                                   | 528 (9.65%)     | 248 (46.97%)    | 310 (10.45%)    | 137 (44.19%)    | 218 (8.70%)     | 111 (50.92%)    | 6.73%                     | -1.91 - 15.24   |
| 60 to 69                                                                                                   | 1 520 (27.77%)  | 855 (56.25%)    | 803 (27.06%)    | 453 (56.41%)    | 717 (28.60%)    | 402 (56.07%)    | -0.34%                    | -5.33 - 4.63    |
| 70 to 79                                                                                                   | 1 877 (34.29%)  | 1 180 (62.87%)  | 1 003 (33.81%)  | 636 (63.41%)    | 874 (34.86%)    | 544 (62.24%)    | -1.17%                    | -5.55 - 3.20    |
| 80 +                                                                                                       | 1 375 (25.12%)  | 952 (69.24%)    | 765 (25.78%)    | 524 (68.50%)    | 610 (24.33%)    | 428 (70.16%)    | 1.66%                     | -3.26 - 6.53    |
| Total                                                                                                      | 5 474           | 3 309 (60.45%)  | 2 967 (54.20%)  | 1 783 (60.09%)  | 2 507 (45.80%)  | 1 526 (60.87%)  | 0.78%                     | -1.83 - 3.37    |
| Mortality with Chronic Cardiovascular Disease, Diabetes mellitus, and Chronic Neurological Disease         |                 |                 |                 |                 |                 |                 |                           |                 |
| 0 to 19                                                                                                    | 4 (0.08%)       | 0 (0.00%)       | 3 (0.10%)       | 0 (0.00%)       | 1 (0.04%)       | 0 (0.00%)       | -                         | -               |
| 20 to 39                                                                                                   | 49 (0.92%)      | 18 (36.73%)     | 26 (0.88%)      | 8 (30.77%)      | 23 (0.98%)      | 10 (43.48%)     | 12.71%                    | -13.52 - 37.04  |
| 40 to 49                                                                                                   | 118 (2.22%)     | 49 (41.53%)     | 60 (2.02%)      | 20 (33.33%)     | 58 (2.47%)      | 29 (50.00%)     | 16.67%                    | -1.06 - 33.03   |
| 50 to 59                                                                                                   | 377 (7.10%)     | 175 (46.42%)    | 211 (7.11%)     | 94 (44.55%)     | 166 (7.08%)     | 81 (48.80%)     | 4.25%                     | -5.83 - 14.24   |
| 60 to 69                                                                                                   | 918 (17.28%)    | 517 (56.32%)    | 494 (16.64%)    | 278 (56.28%)    | 424 (18.09%)    | 239 (56.37%)    | 0.09%                     | -6.33 - 6.49    |
| 70 to 79                                                                                                   | 1 679 (31.61%)  | 1 066 (63.49%)  | 935 (31.50%)    | 571 (61.07%)    | 744 (31.74%)    | 495 (66.53%)    | 5.46%                     | 0.83 - 10.03    |
| 80 +                                                                                                       | 2 167 (40.79%)  | 1 526 (70.42%)  | 1 239 (41.75%)  | 874 (70.54%)    | 928 (39.59%)    | 652 (70.26%)    | -0.28%                    | -4.18 - 3.58    |
| Total                                                                                                      | 5 312           | 3 351 (63.08%)  | 2 968 (55.87%)  | 1 845 (62.16%)  | 2 344 (44.13%)  | 1 506 (64.25%)  | 2.09%                     | -0.53 - 4.69    |
| Mortality with Chronic Cardiovascular Disease, Diabetes mellitus, and Chronic Kidney Disease               |                 |                 |                 |                 |                 |                 |                           |                 |
| 0 to 19                                                                                                    | 2 (0.02%)       | 1 (50.00%)      | 1 (0.02%)       | 1 (100.00%)     | 1 (0.03%)       | 0 (0.00%)       | -100.00%                  | -100.00 - 12.21 |
| 20 to 39                                                                                                   | 177 (2.06%)     | 71 (40.11%)     | 111 (2.28%)     | 39 (35.14%)     | 66 (1.78%)      | 32 (48.48%)     | 13.34%                    | -1.51 - 27.75   |
| 40 to 49                                                                                                   | 455 (5.31%)     | 241 (52.97%)    | 272 (5.58%)     | 130 (47.79%)    | 183 (4.95%)     | 111 (60.66%)    | 12.87%                    | 3.52 - 21.83    |
| 50 to 59                                                                                                   | 1 295 (15.10%)  | 725 (55.98%)    | 754 (15.46%)    | 400 (53.05%)    | 541 (14.63%)    | 325 (60.07%)    | 7.02%                     | 1.54 - 12.42    |
| 60 to 69                                                                                                   | 2 504 (29.20%)  | 1 537 (61.38%)  | 1 393 (28.56%)  | 847 (60.80%)    | 1 111 (30.04%)  | 690 (62.11%)    | 1.31%                     | -2.54 - 5.12    |
| 70 to 79                                                                                                   | 2 561 (29.86%)  | 1 753 (68.45%)  | 1 425 (29.21%)  | 975 (68.42%)    | 1 136 (30.72%)  | 778 (68.49%)    | 0.07%                     | -3.57 - 3.67    |
| 80 +                                                                                                       | 1 582 (18.45%)  | 1 176 (74.34%)  | 922 (18.90%)    | 671 (72.78%)    | 660 (17.85%)    | 505 (76.52%)    | 3.74%                     | -0.64 - 8.01    |
| Total                                                                                                      | 8 576           | 5 504 (64.18%)  | 4 878 (56.88%)  | 3 063 (62.79%)  | 3 698 (43.12%)  | 2 441 (66.01%)  | 3.22%                     | 1.17 - 5.25     |
| Mortality with Chronic Cardiovascular Disease, Diabetes mellitus, and Obesity                              |                 |                 |                 |                 |                 |                 |                           |                 |
| 0 to 19                                                                                                    | 2 (0.02%)       | 1 (50.00%)      | 1 (0.02%)       | 0 (0.00%)       | 1 (0.01%)       | 1 (100.00%)     | 100.00%                   | -12.21 - 100.00 |
| 20 to 39                                                                                                   | 539 (4.50%)     | 184 (34.14%)    | 233 (4.84%)     | 76 (32.62%)     | 306 (4.27%)     | 108 (35.29%)    | 2.67%                     | -5.42 - 10.60   |

Continued on next page

**Table 20 – continued from previous page**

| Age group | Whole pandemic |                | First Wave     |                | Second wave    |                | Second wave vs first wave |              |
|-----------|----------------|----------------|----------------|----------------|----------------|----------------|---------------------------|--------------|
|           | Cases          | Deaths         | Cases          | Deaths         | Cases          | Deaths         | Difference                | 99.5% CI     |
| 40 to 49  | 1 433 (11.96%) | 588 (41.03%)   | 597 (12.39%)   | 208 (34.84%)   | 836 (11.68%)   | 380 (45.45%)   | 10.61%                    | 5.47 - 15.64 |
| 50 to 59  | 2 753 (22.98%) | 1 213 (44.06%) | 1 108 (22.99%) | 421 (38.00%)   | 1 645 (22.98%) | 792 (48.15%)   | 10.15%                    | 6.38 - 13.86 |
| 60 to 69  | 3 772 (31.49%) | 2 102 (55.73%) | 1 453 (30.15%) | 732 (50.38%)   | 2 319 (32.39%) | 1 370 (59.08%) | 8.70%                     | 5.44 - 11.94 |
| 70 to 79  | 2 546 (21.26%) | 1 613 (63.35%) | 1 032 (21.42%) | 624 (60.47%)   | 1 514 (21.15%) | 989 (65.32%)   | 4.85%                     | 1.04 - 8.69  |
| 80 +      | 933 (7.79%)    | 629 (67.42%)   | 395 (8.20%)    | 261 (66.08%)   | 538 (7.52%)    | 368 (68.40%)   | 2.32%                     | -3.72 - 8.44 |
| Total     | 11 978         | 6 330 (52.85%) | 4 819 (40.23%) | 2 322 (48.18%) | 7 159 (59.77%) | 4 008 (55.99%) | 7.81%                     | 5.98 - 9.62  |

Table 20: Mortality with associated risk factors stratified by age group and wave.

| Age group                                         | Whole pandemic   |                  | First wave       |                  | Second wave      |                  | Second wave vs first wave |              |
|---------------------------------------------------|------------------|------------------|------------------|------------------|------------------|------------------|---------------------------|--------------|
|                                                   | Cases            | Deaths           | Cases            | Deaths           | Cases            | Deaths           | Difference                | 99.5% CI     |
| Cases with Gastrointestinal symptoms <sup>a</sup> |                  |                  |                  |                  |                  |                  |                           |              |
| 0 to 19                                           | 2 736 (2.02%)    | 227 (8.30%)      | 1 562 (2.47%)    | 114 (7.30%)      | 1 174 (1.62%)    | 113 (9.63%)      | 2.33%                     | 0.23 - 4.50  |
| 20 to 39                                          | 19 038 (14.05%)  | 2 404 (12.63%)   | 9 404 (14.87%)   | 910 (9.68%)      | 9 634 (13.33%)   | 1 494 (15.51%)   | 5.83%                     | 4.89 - 6.77  |
| 40 to 49                                          | 20 656 (15.25%)  | 3 595 (17.40%)   | 9 727 (15.38%)   | 1 385 (14.24%)   | 10 929 (15.13%)  | 2 210 (20.22%)   | 5.98%                     | 4.96 - 7.01  |
| 50 to 59                                          | 26 574 (19.61%)  | 6 563 (24.70%)   | 11 999 (18.98%)  | 2 550 (21.25%)   | 14 575 (20.17%)  | 4 013 (27.53%)   | 6.28%                     | 5.25 - 7.31  |
| 60 to 69                                          | 28 732 (21.21%)  | 10 622 (36.97%)  | 12 777 (20.21%)  | 4 318 (33.80%)   | 15 955 (22.08%)  | 6 304 (39.51%)   | 5.71%                     | 4.60 - 6.83  |
| 70 to 79                                          | 22 547 (16.64%)  | 10 823 (48.00%)  | 10 196 (16.12%)  | 4 628 (45.39%)   | 12 351 (17.09%)  | 6 195 (50.16%)   | 4.77%                     | 3.46 - 6.07  |
| 80 +                                              | 15 200 (11.22%)  | 8 955 (58.91%)   | 7 567 (11.97%)   | 4 430 (58.54%)   | 7 633 (10.56%)   | 4 525 (59.28%)   | 0.74%                     | -0.83 - 2.30 |
| Total                                             | 135 483          | 43 189 (31.88%)  | 63 232 (46.67%)  | 18 335 (29.00%)  | 72 251 (53.33%)  | 24 854 (34.40%)  | 5.40%                     | 4.91 - 5.90  |
| Cases with Neurological symptoms                  |                  |                  |                  |                  |                  |                  |                           |              |
| 0 to 19                                           | 314 (0.50%)      | 24 (7.64%)       | 132 (0.70%)      | 9 (6.82%)        | 182 (0.42%)      | 15 (8.24%)       | 1.42%                     | -5.05 - 7.28 |
| 20 to 39                                          | 10 471 (16.81%)  | 1 151 (10.99%)   | 3 268 (17.40%)   | 204 (6.24%)      | 7 203 (16.55%)   | 947 (13.15%)     | 6.91%                     | 5.74 - 8.02  |
| 40 to 49                                          | 11 247 (18.05%)  | 1 758 (15.63%)   | 3 287 (17.50%)   | 370 (11.26%)     | 7 960 (18.29%)   | 1 388 (17.44%)   | 6.18%                     | 4.79 - 7.52  |
| 50 to 59                                          | 13 944 (22.38%)  | 3 219 (23.09%)   | 4 070 (21.67%)   | 700 (17.20%)     | 9 874 (22.69%)   | 2 519 (25.51%)   | 8.31%                     | 6.85 - 9.74  |
| 60 to 69                                          | 13 465 (21.61%)  | 4 510 (33.49%)   | 3 870 (20.60%)   | 1 012 (26.15%)   | 9 595 (22.05%)   | 3 498 (36.46%)   | 10.31%                    | 8.60 - 11.98 |
| 70 to 79                                          | 8 500 (13.79%)   | 3 833 (44.62%)   | 2 666 (14.19%)   | 1 047 (39.27%)   | 5 924 (13.61%)   | 2 786 (47.03%)   | 7.76%                     | 5.50 - 9.99  |
| 80 +                                              | 4 276 (6.86%)    | 2 375 (55.54%)   | 1 491 (7.94%)    | 799 (53.59%)     | 2 785 (6.40%)    | 1 576 (56.59%)   | 3.00%                     | -0.12 - 6.13 |
| Total                                             | 62 307           | 16 870 (27.08%)  | 18 784 (30.15%)  | 4 141 (22.05%)   | 43 523 (69.85%)  | 12 729 (29.25%)  | 7.20%                     | 6.47 - 7.93  |
| Cases with Respiratory symptoms                   |                  |                  |                  |                  |                  |                  |                           |              |
| 0 to 19                                           | 8 039 (1.28%)    | 843 (10.49%)     | 4 695 (1.56%)    | 474 (10.10%)     | 3 344 (1.03%)    | 369 (11.03%)     | 0.93%                     | -0.42 - 2.32 |
| 20 to 39                                          | 76 019 (12.14%)  | 10 985 (14.45%)  | 37 500 (12.46%)  | 4 196 (11.19%)   | 38 519 (11.83%)  | 6 789 (17.63%)   | 6.44%                     | 5.94 - 6.93  |
| 40 to 49                                          | 90 893 (14.51%)  | 18 359 (20.20%)  | 43 093 (14.32%)  | 7 153 (16.60%)   | 47 800 (14.68%)  | 11 206 (23.44%)  | 6.84%                     | 6.33 - 7.36  |
| 50 to 59                                          | 120 497 (19.24%) | 34 299 (28.46%)  | 56 043 (18.63%)  | 13 901 (24.80%)  | 64 454 (19.80%)  | 20 398 (31.65%)  | 6.85%                     | 6.34 - 7.35  |
| 60 to 69                                          | 137 600 (21.97%) | 57 649 (41.90%)  | 62 748 (20.85%)  | 24 505 (39.05%)  | 74 852 (22.99%)  | 33 144 (44.28%)  | 5.23%                     | 4.70 - 5.75  |
| 70 to 79                                          | 111 887 (17.86%) | 60 141 (53.75%)  | 53 521 (17.79%)  | 27 684 (51.73%)  | 58 366 (17.93%)  | 32 457 (55.61%)  | 3.88%                     | 3.30 - 4.47  |
| 80 +                                              | 81 486 (13.01%)  | 52 555 (64.50%)  | 43 298 (14.39%)  | 27 823 (64.26%)  | 38 188 (11.73%)  | 24 732 (64.76%)  | 0.50%                     | -0.15 - 1.16 |
| Total                                             | 626 421          | 234 831 (37.49%) | 300 898 (48.03%) | 105 736 (35.14%) | 325 523 (51.97%) | 129 095 (39.66%) | 4.52%                     | 4.28 - 4.76  |
| Cases with Fever                                  |                  |                  |                  |                  |                  |                  |                           |              |
| 0 to 19                                           | 6 789 (1.68%)    | 618 (9.10%)      | 4 010 (1.91%)    | 351 (8.75%)      | 2 779 (1.43%)    | 267 (9.61%)      | 0.86%                     | -0.53 - 2.28 |
| 20 to 39                                          | 56 561 (13.99%)  | 7 578 (13.40%)   | 29 713 (14.17%)  | 3 100 (10.43%)   | 26 848 (13.79%)  | 4 478 (16.68%)   | 6.25%                     | 5.68 - 6.81  |
| 40 to 49                                          | 64 905 (16.05%)  | 12 086 (18.62%)  | 33 345 (15.91%)  | 5 170 (15.50%)   | 31 560 (16.21%)  | 6 916 (21.91%)   | 6.41%                     | 5.81 - 7.01  |
| 50 to 59                                          | 80 512 (19.91%)  | 21 334 (26.50%)  | 40 699 (19.41%)  | 9 448 (23.21%)   | 39 813 (20.45%)  | 11 886 (29.85%)  | 6.64%                     | 6.03 - 7.25  |
| 60 to 69                                          | 84 409 (20.87%)  | 34 017 (40.30%)  | 41 985 (20.03%)  | 15 779 (37.58%)  | 42 424 (21.79%)  | 18 238 (42.99%)  | 5.41%                     | 4.75 - 6.07  |
| 70 to 79                                          | 65 008 (16.08%)  | 34 328 (52.81%)  | 33 647 (16.05%)  | 17 087 (50.78%)  | 31 361 (16.11%)  | 17 241 (54.98%)  | 4.20%                     | 3.43 - 4.96  |
| 80 +                                              | 46 174 (11.42%)  | 29 710 (64.34%)  | 26 252 (12.52%)  | 16 714 (63.67%)  | 19 922 (10.23%)  | 12 996 (65.23%)  | 1.56%                     | 0.69 - 2.45  |
| Total                                             | 404 358          | 139 671 (34.54%) | 209 651 (51.85%) | 67 649 (32.27%)  | 194 707 (48.15%) | 72 022 (36.99%)  | 4.72%                     | 4.43 - 5.02  |
| Cases with Fatigue                                |                  |                  |                  |                  |                  |                  |                           |              |
| 0 to 19                                           | 753 (0.62%)      | 81 (10.76%)      | 230 (0.80%)      | 15 (6.52%)       | 523 (0.56%)      | 66 (12.62%)      | 6.10%                     | 1.37 - 10.12 |
| 20 to 39                                          | 14 592 (11.92%)  | 2 152 (14.75%)   | 3 279 (11.40%)   | 288 (8.78%)      | 11 313 (12.08%)  | 1 864 (16.48%)   | 7.70%                     | 6.47 - 8.85  |
| 40 to 49                                          | 18 335 (14.98%)  | 3 821 (20.84%)   | 4 040 (14.05%)   | 588 (14.55%)     | 14 295 (15.27%)  | 3 233 (22.62%)   | 8.07%                     | 6.75 - 9.32  |
| 50 to 59                                          | 24 897 (20.34%)  | 6 822 (27.40%)   | 5 524 (19.21%)   | 1 118 (20.24%)   | 19 373 (20.69%)  | 5 704 (29.44%)   | 9.20%                     | 7.95 - 10.43 |
| 60 to 69                                          | 27 995 (22.88%)  | 11 258 (40.21%)  | 6 351 (22.08%)   | 2 119 (33.36%)   | 21 644 (23.12%)  | 9 139 (42.22%)   | 8.86%                     | 7.52 - 10.18 |
| 70 to 79                                          | 21 797 (17.81%)  | 11 189 (51.33%)  | 5 396 (18.76%)   | 2 462 (45.63%)   | 16 401 (17.52%)  | 8 727 (53.21%)   | 7.58%                     | 6.05 - 9.11  |
| 80 +                                              | 14 010 (11.45%)  | 8 597 (61.36%)   | 3 939 (13.70%)   | 2 338 (59.36%)   | 10 071 (10.76%)  | 6 259 (62.15%)   | 2.79%                     | 1.00 - 4.60  |
| Total                                             | 122 379          | 43 920 (35.89%)  | 28 759 (23.50%)  | 8 928 (31.04%)   | 93 620 (76.50%)  | 34 992 (37.38%)  | 6.34%                     | 5.71 - 6.95  |
| Cases with oxygen saturation <95%                 |                  |                  |                  |                  |                  |                  |                           |              |
| 0 to 19                                           | 3 721 (0.87%)    | 600 (16.12%)     | 2 021 (1.05%)    | 329 (16.28%)     | 1 700 (0.71%)    | 271 (15.94%)     | -0.34%                    | -2.70 - 2.05 |
| 20 to 39                                          | 43 389 (10.10%)  | 8 319 (19.17%)   | 18 300 (9.54%)   | 3 033 (16.57%)   | 25 089 (10.55%)  | 5 286 (21.07%)   | 4.50%                     | 3.75 - 5.23  |
| 40 to 49                                          | 57 676 (13.42%)  | 14 008 (24.29%)  | 24 493 (12.77%)  | 5 228 (21.34%)   | 33 183 (13.95%)  | 8 780 (26.46%)   | 5.12%                     | 4.41 - 5.81  |
| 50 to 59                                          | 81 895 (19.06%)  | 26 452 (32.30%)  | 35 067 (18.28%)  | 10 316 (29.42%)  | 46 828 (19.68%)  | 16 136 (34.46%)  | 5.04%                     | 4.40 - 5.68  |
| 60 to 69                                          | 98 593 (22.94%)  | 44 836 (45.48%)  | 42 523 (22.17%)  | 18 422 (43.32%)  | 56 070 (23.57%)  | 26 414 (47.11%)  | 3.79%                     | 3.16 - 4.41  |
| 70 to 79                                          | 82 783 (19.26%)  | 47 049 (56.83%)  | 37 734 (19.67%)  | 20 915 (55.43%)  | 45 049 (18.93%)  | 26 134 (58.01%)  | 2.58%                     | 1.91 - 3.26  |
| 80 +                                              | 61 694 (14.36%)  | 41 223 (66.82%)  | 31 696 (16.52%)  | 21 188 (66.85%)  | 29 998 (12.61%)  | 20 035 (66.79%)  | -0.06%                    | -0.80 - 0.68 |
| Total                                             | 429 751          | 182 487 (42.46%) | 191 834 (44.64%) | 79 431 (41.41%)  | 237 917 (55.36%) | 103 056 (43.32%) | 1.91%                     | 1.61 - 2.21  |

Note: We only consider data that have an informed outcome. Symptoms are collected only at the time of patient admission, as follows: Fever, Cough, Sore Throat, Dyspnea, Respiratory Discomfort, Oxygen Saturation <95%, Diarrhea, Vomiting, Abdominal pain, Fatigue, Loss of smell, and loss of taste.

<sup>a</sup> Gastrointestinal symptoms include: diarrhea, vomiting, and abdominal pain.

<sup>b</sup> Neurological symptoms include: loss of smell and taste.

<sup>c</sup> Respiratory symptoms include: dyspnea, respiratory discomfort, and sore throat

Table 21: Symptoms stratified by age group and wave.

| <b>Self-reported race/ethnicity</b> | <b>%</b> |
|-------------------------------------|----------|
| White                               | 47.7     |
| Black/Brown                         | 50.7     |
| Asian                               | 1.1      |
| Indigenous                          | 0.4      |

Table 22: Percentage of population by race/ethnicity. Data from the Brazilian Institute of Geography and Statistics (IBGE) for the 2010 population census.

| <b>Age group</b> | <b>Sex</b> | <b>Population</b> |
|------------------|------------|-------------------|
| 0-19             | Female     | 29 342 837        |
|                  | Male       | 30 634 126        |
|                  | Total      | 59 976 963        |
| 20-39            | Female     | 34 373 389        |
|                  | Male       | 34 077 704        |
|                  | Total      | 68 451 093        |
| 40-49            | Female     | 15 104 223        |
|                  | Male       | 14 151 255        |
|                  | Total      | 29 255 478        |
| 50-59            | Female     | 12 527 972        |
|                  | Male       | 11 347 109        |
|                  | Total      | 23 875 081        |
| 60-69            | Female     | 9 045 409         |
|                  | Male       | 7 687 563         |
|                  | Total      | 16 732 972        |
| 70-79            | Female     | 5 082 169         |
|                  | Male       | 3 940 883         |
|                  | Total      | 9 023 052         |
| 80+              | Female     | 2 752 004         |
|                  | Male       | 1 689 049         |
|                  | Total      | 4 441 053         |

Table 23: Percentage of population by race/ethnicity. Data from the Brazilian Institute of Geography and Statistics (IBGE) for the 2010 population census.
